# Supplementary material for: Rhodium-catalyzed asymmetric hydrogenation of tetrasubstituted β-acetoxy-α-enamido esters and efficient synthesis of droxidopa
Source: Royal Society of Chemistry journal article supplement (doi:10.1039/c7cc03902f), 2017-01-01
Supplement: c7cc03902f1.pdf [file c7cc03902f1.pdf]

*Supporting Information for*

**Rhodium-catalyzed Asymmetric Hydrogenation of  
Tetrasubstituted  $\beta$ -acetoxy- $\alpha$ -enamido Esters and Efficient  
Synthesis of Droxidopa**

Yu-Qing Guan, Min Gao, Xu Deng, Hui Lv,\* and Xumu Zhang\*

**Contents**

|                                                                                                                            |     |
|----------------------------------------------------------------------------------------------------------------------------|-----|
| 1. General Information.....                                                                                                | S2  |
| 2. General Procedure for the Synthesis of Compound <b>1</b> .....                                                          | S2  |
| 3. General Procedure for Asymmetric Hydrogenation of Compound <b>1</b> .....                                               | S9  |
| 4. Procedure for the Synthesis of Compound <b>4</b> .....                                                                  | S16 |
| 5. References.....                                                                                                         | S17 |
| 6. NMR spectra of ( <i>E</i> )- <b>1</b> , <b>2</b> , <b>3</b> and <b>4</b> , HPLC spectra or GC spectra of <b>2</b> ..... | S19 |

## 1. General Information

Unless otherwise noted, all reagents and solvents were purchased from commercial suppliers and used without further purification. NMR spectra were recorded on Bruker ADVANCE III (400 MHz) spectrometers for  $^1\text{H}$  NMR and  $^{13}\text{C}$  NMR.  $\text{CDCl}_3$  was the solvent used for the NMR analysis, with tetramethylsilane as the internal standard. Chemical shifts were reported upfield to TMS (0.00 ppm) for  $^1\text{H}$  NMR and relative to  $\text{CDCl}_3$  (77.0 ppm) for  $^{13}\text{C}$  NMR. Optical rotation was determined using a Perkin Elmer 343 polarimeter. HPLC analysis was conducted on an Agilent 1260 Series instrument. Column Chromatography was performed with silica gel Merck 60 (300-400 mesh). All new products were further characterized by HRMS. A positive ion mass spectrum of sample was acquired on a Thermo LTQ-FT mass spectrometer with an electrospray ionization source.

## 2. General Procedure for the Synthesis of Compound 1

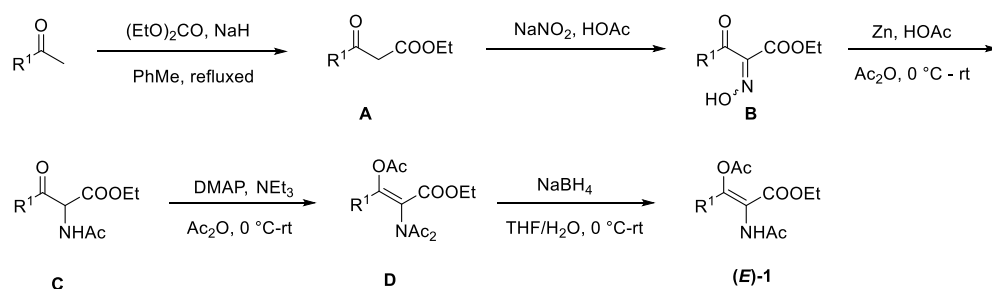

To a stirred solution of ketones (25 mmol) in toluene (120 mL) was added ethyl dicarbonate (75 mmol) and  $\text{NaH}$  (50 mmol, 60%). The reaction mixture was refluxed until TLC indicated the total consumption of the ketones. After cooling, the reaction mixture was quenched by ice water, acidified with 3 M  $\text{HCl}$  to pH 2~3 and extracted with  $\text{EtOAc}$  ( $100\text{ mL} \times 3$ ). The combined organic layer was dried over sodium sulfate and evaporated under reduced pressure. The obtained-keto ester **A** was used directly for the next step without further purifications.<sup>[1]</sup>

To a solution of  $\beta$ -keto ester **A** (20 mmol) in  $\text{HOAc}$  (5.7 mL, 100 mmol) was added  $\text{NaNO}_2$  (2.07 g, 30 mmol) in  $\text{H}_2\text{O}$  (6 mL) at  $0\text{ }^\circ\text{C}$ . The reaction was monitored by TLC. When the reaction was completed, the reaction mixture was treated with  $\text{H}_2\text{O}$  (50 mL) and  $\text{CH}_2\text{Cl}_2$  (50 mL), the mixture was stirred for 10 minutes and the phases were separated. The aqueous layer was extracted with  $\text{CH}_2\text{Cl}_2$  ( $3 \times 30\text{ mL}$ ). The combined organic solution was washed with saturated  $\text{NaHCO}_3$  (150 mL) and brine

(150 mL), then dried over Na<sub>2</sub>SO<sub>4</sub>. After evaporation of the solvent, the residue was subjected to chromatography or crystallization to afford the desired  $\alpha$ -hydroxyimino- $\beta$ -ketoester **B**, yielding 95-99%.<sup>[2]</sup>

To a stirred ice-cold solution of **B** (10 mmol) in Ac<sub>2</sub>O (15-30 mL) was added Zn powder (3.25 g, 10 mmol) in small portion. Then HOAc (5.7 mL, 100 mmol) was added drop-wise from the dropping funnel to the heterogeneous solution at 0 °C. The reaction. After completion of the reaction, the mixture was filtered and the residue was washed with CH<sub>2</sub>Cl<sub>2</sub> (100 mL). The filtrate was treated with saturated NaHCO<sub>3</sub> and separated. The organic phase was washed with brine (100 mL), then dried over Na<sub>2</sub>SO<sub>4</sub>. After evaporation of the solvent, the residue was subject to chromatography (PE/EA 2/1) to get the desired product  $\alpha$ -acetamido- $\beta$ -ketoester **C** in 70-92% yield.<sup>[3]</sup>

To a stirred solution of **C** (4.26 mmol) in acetic anhydride (16 mL) was added Et<sub>3</sub>N (1.85 mL, 13.4 mmol), and DMAP (0.0052 g, 0.043 mmol) at 0 °C. After 0.5 h at 0 °C, the reaction was kept at room temperature and monitored by TLC. The reaction mixture was treated with saturated NaHCO<sub>3</sub> and separated. The organic phase was washed with brine (50 mL), then dried over Na<sub>2</sub>SO<sub>4</sub>. After evaporation of the solvent, the residue was subject to chromatography (PE/EA 8/1) to get the desired product  $\alpha$ -acetamido- $\beta$ -ketoester **D**, yielding 78-90%.<sup>[4]</sup>

Sodium borohydride (76.5 mg, 2.0 mmol) in water (0.6 mL) was added dropwise to a stirred solution of **D** (1 mmol) in tetrahydrofuran (40 mL) at 0 °C. After 20 min, the mixture was allowed to warm up to room temperature and then stirring was continued for 1 h. The reaction was quenched with brine (2 mL), and the resulting mixture was diluted with ethyl acetate (200 mL). The organic layer was washed with brine and dried over Na<sub>2</sub>SO<sub>4</sub>. Concentration of the solvent in vacuo gave a residue, which was purified by column chromatography (PE/EA 1/1) to give (*E*)-**1** as a white solid, yielding 40-70%.<sup>[5]</sup>

**(*E*)-ethyl-2-acetamido-3-acetoxy-3-phenylacrylate ((*E*)-1a)**

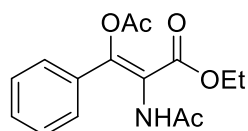

White solid; m. p. 142-145 °C; 150 mg; <sup>1</sup>H NMR (400 MHz, CDCl<sub>3</sub>)  $\delta$  = 7.48-7.50 (m, 2H), 7.40-7.42 (m, 3H), 6.99 (s, 1H), 4.28 (q, *J* = 7.1 Hz, 1H), 2.23 (s, 3H), 2.00 (s, 3H), 1.33 (t, *J* = 7.1 Hz, 3H); <sup>13</sup>C NMR (101 MHz, CDCl<sub>3</sub>)  $\delta$  = 169.22,

168.36, 163.41, 148.52, 133.16, 130.09, 128.68, 127.88, 119.03, 61.59, 22.81, 20.81, 14.14. ESI-HRMS calculated for  $C_{15}H_{18}NO_5^+$  ( $[M+H]^+$ ): 292.1179, found 292.1175. The structure of (*E*)-**1a** was determined by X-Ray (figure 1).

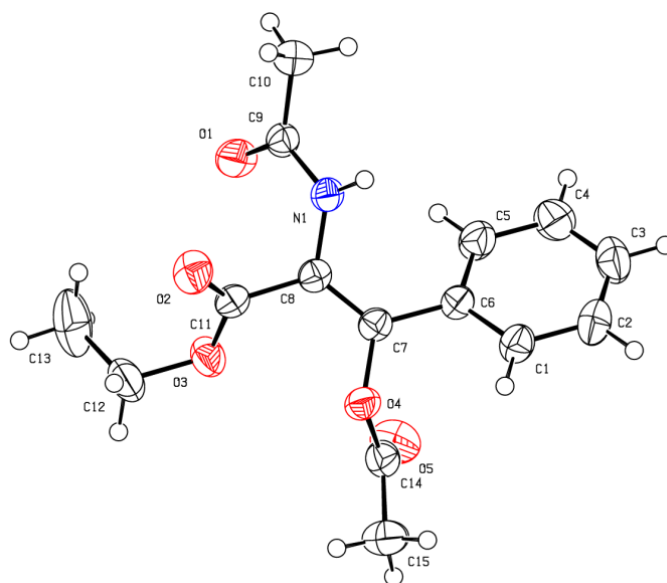

Figure 1. the X-ray structure of (*E*)-**1a**.

**(*E*)-methyl-2-acetamido-3-acetoxy-3-phenylacrylate ((*E*)-1b)**

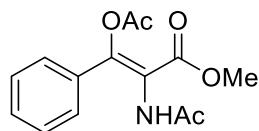

White solid; m. p. 183-186 °C; 130 mg;  $^1H$  NMR (400 MHz,  $CDCl_3$ )  $\delta$  = 7.46-7.49 (m, 2H), 7.39-7.43 (m, 3H), 6.73 (s, 1H), 3.81 (s, 3H), 2.23 (s, 3H), 2.01 (s, 3H);  $^{13}C$  NMR (101 MHz,  $CDCl_3$ )  $\delta$  = 169.14, 168.48, 163.78, 149.02, 133.12, 130.24, 128.78, 127.94, 118.65, 52.60, 22.94, 20.83. ESI-HRMS calculated for  $C_{14}H_{16}NO_5^+$  ( $[M+H]^+$ ): 278.1023, found 278.1016.

**(*E*)-ethyl-2-acetamido-3-acetoxy-3-(*p*-tolyl)acrylate ((*E*)-1c)**

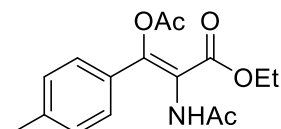

White solid; m. p. 174-176 °C; 145 mg;  $^1H$  NMR (400 MHz,  $CDCl_3$ )  $\delta$  = 7.36-7.38 (m, 2H), 7.19-7.21 (m, 2H), 6.72 (s, 1H), 4.27 (q,  $J$  = 7.1 Hz, 2H), 2.37 (s, 3H), 2.21 (s, 3H), 2.01 (s, 3H), 1.31 (t,  $J$  = 7.1 Hz, 3H);  $^{13}C$  NMR (101 MHz,  $CDCl_3$ )  $\delta$  =

169.30, 168.39, 163.54, 148.87, 140.41, 130.24, 129.38, 127.78, 118.48, 61.50, 22.77, 21.47, 20.82, 14.14. ESI-HRMS calculated for  $C_{16}H_{20}NO_5^+$  ( $[M+H]^+$ ): 306.1336, found 306.1333.

**(E)-ethyl-2-acetamido-3-acetoxy-3-(4-methoxyphenyl)acrylate ((E)-1d)**

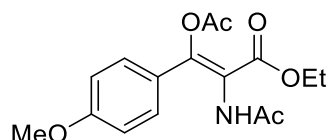

White solid; m. p. 161-164 °C; 155 mg;  $^1H$  NMR (400 MHz,  $CDCl_3$ )  $\delta$  = 7.42-7.44 (m, 2H), 6.72-6.91 (m, 2H), 6.72 (s, 1H), 4.26 (q,  $J$  = 7.1 Hz, 2H), 3.83 (s, 3H), 2.22 (s, 3H), 2.02 (s, 3H), 1.31 (t,  $J$  = 7.1 Hz, 3H);  $^{13}C$  NMR (101 MHz,  $CDCl_3$ )  $\delta$  = 169.10, 168.44, 163.55, 160.91, 149.32, 129.55, 125.40, 117.72, 114.16, 61.53, 55.41, 22.99, 20.92, 14.20. ESI-HRMS calculated for  $C_{16}H_{20}NO_6^+$  ( $[M+H]^+$ ): 322.1285, found 322.1282.

**(E)-ethyl-2-acetamido-3-acetoxy-3-(4-chlorophenyl)acrylate ((E)-1e)**

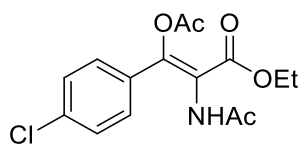

White solid; m. p. 188-190 °C; 150 mg;  $^1H$  NMR (400 MHz,  $CDCl_3$ )  $\delta$  = 7.41-7.43 (m, 2H), 7.35-7.38 (m, 2H), 4.27 (q,  $J$  = 7.1 Hz, 2H), 2.22 (s, 3H), 2.01 (s, 3H), 1.32 (t,  $J$  = 7.1 Hz, 3H);  $^{13}C$  NMR (101 MHz,  $CDCl_3$ )  $\delta$  = 168.97, 168.34, 163.24, 148.28, 136.14, 131.89, 129.25, 129.06, 119.04, 61.80, 23.01, 20.84, 14.18. ESI-HRMS calculated for  $C_{15}H_{15}NO_5Cl^-$  ( $[M-H]^-$ ): 324.0644, found 324.06447.

**(E)-ethyl-2-acetamido-3-acetoxy-3-(4-fluorophenyl)acrylate ((E)-1f)**

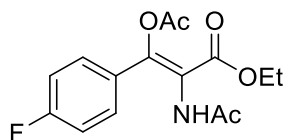

White solid; m. p. 135-137 °C; 132 mg;  $^1H$  NMR (400 MHz,  $CDCl_3$ )  $\delta$  = 7.46-7.50 (m, 2H), 7.06-7.10 (m, 2H), 6.73 (s, 1H), 4.27 (q,  $J$  = 7.1 Hz, 2H), 2.22 (s, 3H), 2.00 (s, 3H), 1.32 (t,  $J$  = 7.1 Hz, 3H);  $^{13}C$  NMR (101 MHz,  $CDCl_3$ )  $\delta$  = 169.02, 168.35, 164.66, 163.31, 148.62, 130.13, 130.04, 129.50, 118.74, 116.06, 115.84, 61.73, 22.99,

20.86, 14.18. ESI-HRMS calculated for  $C_{15}H_{17}NO_5F^+$  ( $[M+H]^+$ ): 310.1085, found 310.1077.

**(E)-ethyl-2-acetamido-3-acetoxy-3-(4-isobutylphenyl)acrylate ((E)-1g)**

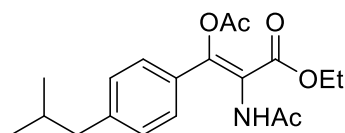

White solid; m. p. 127-130 °C; 152 mg;  $^1H$  NMR (400 MHz,  $CDCl_3$ )  $\delta$  = 7.38 (d,  $J$  = 8.2 Hz, 2H), 7.17 (d,  $J$  = 8.2 Hz, 2H), 6.73 (s, 1H), 4.27 (q,  $J$  = 7.1 Hz, 2H), 2.48 (d,  $J$  = 7.2 Hz, 2H), 2.22 (s, 3H), 2.02 (s, 3H), 1.85-1.90 (m, 1H), 1.31 (t,  $J$  = 7.1 Hz, 3H), 0.91 (d,  $J$  = 6.6 Hz, 6H);  $^{13}C$  NMR (101 MHz,  $CDCl_3$ )  $\delta$  = 169.12, 168.42, 163.47, 148.78, 144.29, 130.41, 129.47, 127.70, 118.55, 61.55, 45.30, 30.13, 22.93, 22.44, 20.90, 14.18. ESI-HRMS calculated for  $C_{19}H_{26}NO_5^+$  ( $[M+H]^+$ ): 348.1805, found 348.1797.

**(E)-ethyl-2-acetamido-3-acetoxy-3-(3-methoxyphenyl)acrylate ((E)-1h)**

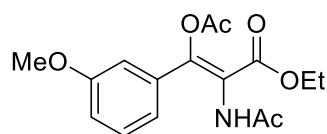

White solid; m. p. 123-125 °C; 128 mg;  $^1H$  NMR (400 MHz,  $CDCl_3$ )  $\delta$  = 7.30-7.34 (m, 1H), 7.05-7.07 (m, 1H), 7.00-7.01 (m, 1H), 6.91-6.94 (m, 1H), 4.28 (q,  $J$  = 7.1 Hz, 2H), 3.80 (s, 3H), 2.21 (s, 3H), 2.02 (s, 3H), 1.32 (t,  $J$  = 7.1 Hz, 3H);  $^{13}C$  NMR (101 MHz,  $CDCl_3$ )  $\delta$  = 168.91, 168.35, 163.33, 159.68, 147.73, 134.40, 129.91, 120.23, 119.25, 115.78, 113.36, 61.67, 55.40, 22.94, 20.83, 14.18. ESI-HRMS calculated for  $C_{16}H_{20}NO_6^+$  ( $[M+H]^+$ ): 322.1285, found 322.1283.

**(E)-ethyl-2-acetamido-3-acetoxy-3-(3-fluorophenyl)acrylate ((E)-1i)**

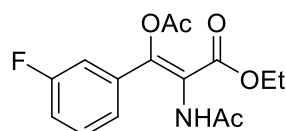

White solid; m. p. 112-115 °C; 123 mg;  $^1H$  NMR (400 MHz,  $CDCl_3$ )  $\delta$  = 7.35-7.40 (m, 1H), 7.28-7.30 (m, 1H), 7.17-7.20 (m, 1H), 7.05-7.09 (m, 1H), 6.73 (s, 1H), 4.29 (q,  $J$  = 7.1 Hz, 2H), 2.23 (s, 3H), 2.03 (s, 3H), 1.32 (t,  $J$  = 7.1 Hz, 3H);  $^{13}C$  NMR (101

MHz, CDCl<sub>3</sub>)  $\delta$  = 168.82, 168.29, 163.17, 161.43, 130.49, 130.41, 123.62, 117.28, 117.07, 114.99, 114.76, 61.84, 23.05, 20.82, 14.18. ESI-HRMS calculated for C<sub>15</sub>H<sub>15</sub>NO<sub>5</sub>F<sup>-</sup> ([M-H]<sup>-</sup>): 308.0940, found 308.0942.

**(E)-ethyl-2-acetamido-3-acetoxy-3-(2-fluorophenyl)acrylate ((E)-1j)**

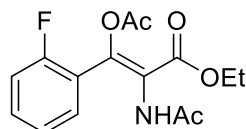

White solid; m. p. 137-139 °C; 117 mg; <sup>1</sup>H NMR (400 MHz, CDCl<sub>3</sub>)  $\delta$  = 7.39-7.44 (m, 2H), 7.10-7.21 (m, 2H), 6.73 (s, 1H), 4.28 (q, *J* = 7.1 Hz, 2H), 2.20 (s, 3H), 1.97 (s, 3H), 1.32 (t, *J* = 7.1 Hz, 3H); <sup>13</sup>C NMR (101 MHz, CDCl<sub>3</sub>)  $\delta$  = 168.78, 168.08, 162.82, 160.63, 158.13, 144.12, 132.10, 132.01, 130.19, 130.17, 124.52, 124.49, 121.28, 121.02, 116.38, 116.16, 61.72, 22.85, 20.76, 14.14. ESI-HRMS calculated for C<sub>15</sub>H<sub>17</sub>NO<sub>5</sub>F<sup>+</sup> ([M+H]<sup>+</sup>): 310.1085, found 310.1077.

**(E)-ethyl-2-acetamido-3-acetoxy-3-(naphthalen-2-yl)acrylate ((E)-1k)**

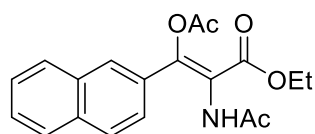

White solid; m. p. 162-164 °C; 238 mg; <sup>1</sup>H NMR (400 MHz, CDCl<sub>3</sub>)  $\delta$  = 7.95 (s, 1H), 7.83-7.86 (m, 3H), 7.52-7.56 (m, 3H), 6.79 (s, 1H), 4.30 (q, *J* = 7.1 Hz, 2H), 2.24 (s, 3H), 2.00 (s, 3H), 1.33 (t, *J* = 7.1 Hz, 3H); <sup>13</sup>C NMR (101 MHz, CDCl<sub>3</sub>)  $\delta$  = 169.03, 168.45, 163.42, 148.63, 133.78, 132.86, 130.62, 128.62, 128.53, 128.10, 127.81, 127.59, 126.85, 124.64, 119.19, 61.70, 22.96, 20.90, 14.21. ESI-HRMS calculated for C<sub>19</sub>H<sub>20</sub>NO<sub>5</sub><sup>+</sup> ([M+H]<sup>+</sup>): 342.1336, found 342.1332.

**(E)-methyl-2-acetamido-3-acetoxy-3-(3,4-dimethoxyphenyl)acrylate ((E)-1l)**

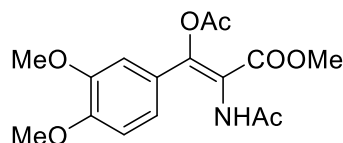

White solid; m. p. 174-176 °C; 150 mg; <sup>1</sup>H NMR (400 MHz, CDCl<sub>3</sub>)  $\delta$  = 7.06-7.09 (m, 1H), 7.00 (d, *J* = 2.0 Hz, 1H), 6.87 (d, *J* = 8.4 Hz, 1H), 6.79 (s, 1H), 3.90 (s, 3H), 3.85 (s, 3H), 3.81 (s, 3H), 2.23 (s, 3H), 2.03 (s, 3H); <sup>13</sup>C NMR (101

MHz, CDCl<sub>3</sub>)  $\delta$  = 169.16, 168.57, 163.88, 150.60, 149.50, 148.82, 125.44, 121.29, 117.56, 110.94, 110.66, 55.97, 52.54, 22.94, 20.87. ESI-HRMS calculated for C<sub>16</sub>H<sub>20</sub>NO<sub>7</sub><sup>+</sup> ([M+H]<sup>+</sup>): 338.1232, found 338.1229.

**(E)-methyl-2-acetamido-3-acetoxy-3-(3,4-bis(benzyloxy)phenyl)acrylate ((E)-1m)**

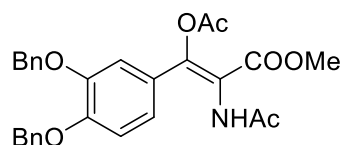

White solid; m. p. 122-125 °C; 250 mg; <sup>1</sup>H NMR (400 MHz, CDCl<sub>3</sub>)  $\delta$  7.49-7.28 (m, 10 H), 7.02 (s, 1H), 6.91 (d, *J* = 8.9 Hz, 1H), 6.66 (s, 1H), 5.18 (s, 2H), 5.14 (s, 2H), 3.78 (s, 3H), 2.13 (s, 3H), 1.90 (s, 3H); <sup>13</sup>C NMR (101 MHz, CDCl<sub>3</sub>)  $\delta$  169.08, 168.46, 163.85, 150.53, 148.86, 148.50, 136.83, 136.64, 128.67, 128.08, 128.01, 127.21, 127.17, 125.80, 121.86, 117.66, 114.21, 113.88, 71.20, 70.91, 52.51, 22.89, 20.76. ESI-HRMS calculated for C<sub>28</sub>H<sub>28</sub>NO<sub>7</sub><sup>+</sup> ([M+H]<sup>+</sup>): 490.1858, found 490.1855.

**(E)-ethyl-2-acetamido-3-acetoxy-3-cyclopropylacrylate ((E)-1n)**

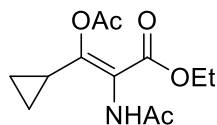

White solid; 120 mg; <sup>1</sup>H NMR (400 MHz, CDCl<sub>3</sub>)  $\delta$  = 6.83 (s, 1H), 4.16 (q, *J* = 7.1 Hz, 2H), 2.19 (s, 3H), 2.14 (s, 3H), 1.89-1.93 (m, 1H), 1.25 (t, *J* = 7.1 Hz, 3H), 0.80-0.98 (m, 4H); <sup>13</sup>C NMR (101 MHz, CDCl<sub>3</sub>)  $\delta$  = 169.61, 168.29, 162.74, 159.08, 116.06, 61.17, 23.21, 20.85, 14.19, 12.87, 6.76. ESI-HRMS calculated for C<sub>12</sub>H<sub>18</sub>NO<sub>5</sub><sup>+</sup> ([M+H]<sup>+</sup>): 256.1179, found 256.1177.

**(E)-ethyl-2-acetamido-3-acetoxybut-2-enoate ((E)-1o)**

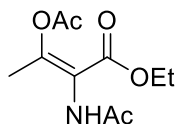

White solid; 133 mg; <sup>1</sup>H NMR (400 MHz, CDCl<sub>3</sub>)  $\delta$  = 6.76 (s, 1H), 4.20 (q, *J* = 7.1 Hz, 2H), 2.22 (s, 3H), 2.12 (s, 3H), 2.01 (s, 3H), 1.28 (t, *J* = 7.1 Hz, 3H); <sup>13</sup>C NMR (101 MHz, CDCl<sub>3</sub>)  $\delta$  = 168.78, 168.37, 162.93, 155.78, 117.24, 61.46, 23.30, 20.99, 19.28, 14.19. ESI-HRMS calculated for C<sub>10</sub>H<sub>16</sub>NO<sub>5</sub><sup>+</sup> ([M+H]<sup>+</sup>): 230.1023, found 230.1018.



---

### 3. General Procedure for Asymmetric Hydrogenation of Compound 1

A stock solution was made by mixing  $[\text{Rh}(\text{COD})_2]\text{BF}_4$  with (*R<sub>C</sub>,S<sub>P</sub>*)-DuanPhos in a 1:1.1 molar ratio in  $\text{CH}_2\text{Cl}_2$  at room temperature for 30 min in a nitrogen-filled glovebox. An aliquot of the catalyst solution (0.5 mL, 0.001 mmol) was transferred by syringe into the vials charged with different substrates (0.05 mmol for each). The vials were subsequently transferred into an autoclave into which hydrogen gas was charged. The reaction was then stirred under  $\text{H}_2$  (30 atm) at room temperature for 24 h. The hydrogen gas was released slowly and carefully. The solution was concentrated and passed through a short column of silica gel (eluent: EtOAc) to remove the metal complex. The ee values of all compounds **2** were determined by HPLC analysis on a chiral stationary phase.

#### Procedure for Gram-scale Asymmetric Hydrogenation of (*E*)-**1a**

A stock solution was made by mixing  $[\text{Rh}(\text{COD})_2]\text{BF}_4$  with (*R<sub>C</sub>,S<sub>P</sub>*)-DuanPhos in a 1:1.1 molar ratio in  $\text{CH}_2\text{Cl}_2$  at room temperature for 45 min in a nitrogen-filled glovebox. An aliquot of the catalyst solution (2 mL, 0.068 mmol) was transferred by syringe into the vial charged with (*E*)-**1a** (3.4 mmol) in anhydrous  $\text{CH}_2\text{Cl}_2$  (5 mL). The vials were subsequently transferred into an autoclave into which hydrogen gas was charged. The reaction was then stirred under  $\text{H}_2$  (30 atm) at room temperature for 30 h. The hydrogen gas was released slowly and carefully. The solution was concentrated and passed through a short column of silica gel (eluent: EtOAc) to remove the metal complex. The ee values of **2a** were determined by HPLC analysis on a chiral stationary phase.

#### Procedure for TON study of Asymmetric Hydrogenation of (*E*)-**1a**

A stock solution was made by mixing  $[\text{Rh}(\text{COD})_2]\text{BF}_4$  with (*R<sub>C</sub>,S<sub>P</sub>*)-DuanPhos in a 1:1.1 molar ratio in  $\text{CH}_2\text{Cl}_2$  at room temperature for 45 min in a nitrogen-filled glovebox. An aliquot of the catalyst solution (0.2 mL, 0.0004 mmol) was transferred by syringe into the vial charged with (*E*)-**1a** (0.2 mmol) in anhydrous  $\text{CH}_2\text{Cl}_2$  (2 mL). The vials were subsequently transferred into an autoclave into which hydrogen gas was charged. The reaction was then stirred under  $\text{H}_2$  (70 atm) at 60 °C for 24 h. The hydrogen gas was released slowly and carefully. The solution was concentrated and passed through a short column of silica gel (eluent: EtOAc) to remove the metal

complex. The ee values of **2a** were determined by HPLC analysis on a chiral stationary phase.

**(2*S*,3*R*)-ethyl-2-acetamido-3-acetoxy-3-phenylpropanoate (2a)**

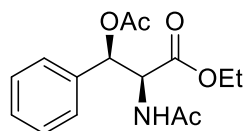

White solid; m. p. 68-70 °C; 14.6 mg, 99% yield; >99% ee;  $[\alpha]_D^{20} = -36.70$  ( $c = 1.00$ ,  $\text{CHCl}_3$ ); The enantiomeric excess was determined by HPLC on Chiralpak OJ-H column, hexane: isopropanol = 95:5; flow rate = 1.0 mL/min; UV detection at 210 nm;  $t_R = 21.2$  min (major), 29.7 min (minor).  $^1\text{H}$  NMR (400 MHz,  $\text{CDCl}_3$ )  $\delta = 7.32$ -7.39 (m, 5H), 6.30 (d,  $J = 4.2$  Hz, 1H), 6.18 (d,  $J = 9.2$  Hz, 1H), 5.09 (dd,  $J = 9.2$  Hz, 4.2 Hz, 1H), 4.17 (q,  $J = 7.1$  Hz, 2H), 2.16 (s, 3H), 1.97 (s, 3H), 1.22 (t,  $J = 7.1$  Hz, 3H);  $^{13}\text{C}$  NMR (101 MHz,  $\text{CDCl}_3$ )  $\delta = 169.85, 169.56, 169.53, 135.94, 128.66, 128.55, 126.29, 74.69, 61.97, 56.38, 23.00, 20.89, 14.02$ . ESI-HRMS calculated for  $\text{C}_{15}\text{H}_{20}\text{NO}_5^+$  ( $[\text{M}+\text{H}]^+$ ): 294.1336, found 294.1334.

**(2*S*,3*R*)-methyl-2-acetamido-3-acetoxy-3-phenylpropanoate (2b)**

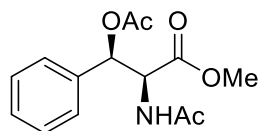

White solid; m. p. 135-136 °C; 13.9 mg; 99% yield; >99% ee;  $[\alpha]_D^{20} = -29.33$  ( $c = 0.60$ ,  $\text{CHCl}_3$ ); The enantiomeric excess was determined by HPLC on Chiralpak OJ-H column, hexane: isopropanol = 95:5; flow rate = 1.0 mL/min; UV detection at 210 nm;  $t_R = 39.4$  min (major), 54.8 min (minor).  $^1\text{H}$  NMR (400 MHz,  $\text{CDCl}_3$ )  $\delta = 7.28$ -7.37 (m, 5H), 6.28 (d,  $J = 3.9$  Hz, 1H), 6.13 (d,  $J = 9.2$  Hz, 1H), 5.07 (dd,  $J = 9.3$  Hz, 3.9 Hz, 1H), 3.71 (s, 3H), 2.14 (s, 3H), 1.95 (s, 3H);  $^{13}\text{C}$  NMR (101 MHz,  $\text{CDCl}_3$ )  $\delta = 170.10, 169.83, 169.53, 135.91, 128.68, 128.60, 126.16, 74.53, 56.29, 52.80, 23.01, 20.92$ . ESI-HRMS calculated for  $\text{C}_{14}\text{H}_{18}\text{NO}_5^+$  ( $[\text{M}+\text{H}]^+$ ): 280.1179, found 280.1173.

**(2*S*,3*R*)-ethyl-2-acetamido-3-acetoxy-3-(*p*-tolyl)propanoate (2c)**

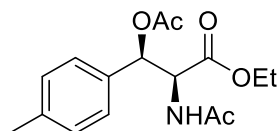

White solid; m. p. 123-158 °C; 15.1 mg; 98% yield; >99% ee;  $[\alpha]_D^{20} = -14.08$  ( $c = 0.71$ ,  $\text{CHCl}_3$ ); The enantiomeric excess was determined by HPLC on Chiralpak OJ-H column, hexane: isopropanol = 95:5; flow rate = 1.0 mL/min; UV detection at 210 nm;  $t_R = 17.6$  min (major), 23.9 min (minor).  $^1\text{H}$  NMR (400 MHz,  $\text{CDCl}_3$ )  $\delta = 7.13$ -7.20 (m, 4H), 6.24 (d,  $J = 4.2$  Hz, 1H), 6.13 (d,  $J = 9.3$  Hz, 1H), 5.04 (dd,  $J = 9.3$  Hz, 4.2 Hz, 1H), 4.15 (q,  $J = 7.1$  Hz, 2H), 2.33 (s, 3H), 2.12 (s, 3H), 1.96 (s, 3H), 1.20 (t,  $J = 7.1$  Hz, 3H);  $^{13}\text{C}$  NMR (101 MHz,  $\text{CDCl}_3$ )  $\delta = 169.88$ , 169.63, 169.58, 138.47, 132.93, 129.25, 126.22, 74.62, 61.93, 56.37, 23.05, 21.23, 20.92, 14.02. ESI-HRMS calculated for  $\text{C}_{16}\text{H}_{22}\text{NO}_5^+$  ( $[\text{M}+\text{H}]^+$ ): 308.1492, found 308.1491.

**(2S,3R)-ethyl-2-acetamido-3-acetoxy-3-(4-methoxyphenyl)propanoate (2d)**

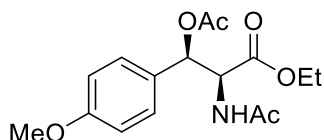

White solid; m. p. 129-131 °C; 15.7 mg; 97% yield; >99% ee;  $[\alpha]_D^{20} = -2.96$  ( $c = 0.30$ ,  $\text{CHCl}_3$ ); The enantiomeric excess was determined by HPLC on Chiralpak OJ-H column, hexane: isopropanol = 94:6; flow rate = 1.0 mL/min; UV detection at 210 nm;  $t_R = 34.9$  min (major), 49.1 min (minor).  $^1\text{H}$  NMR (400 MHz,  $\text{CDCl}_3$ )  $\delta = 7.22$ -7.26 (m, 2H), 6.85 – 6.88 (m, 2H), 6.21 (d,  $J = 4.5$  Hz, 1H), 6.17 (d,  $J = 9.3$  Hz, 1H), 5.03 (dd,  $J = 9.3$  Hz, 4.5 Hz, 1H), 4.13 (q,  $J = 7.1$  Hz, 2H), 3.79 (s, 3H), 2.11 (s, 3H), 1.97 (s, 3H), 1.19 (t,  $J = 7.1$  Hz, 3H);  $^{13}\text{C}$  NMR (101 MHz,  $\text{CDCl}_3$ )  $\delta = 169.85$ , 169.62, 159.73, 127.95, 127.75, 113.89, 74.42, 61.87, 56.42, 55.26, 23.04, 20.92, 14.01. ESI-HRMS calculated for  $\text{C}_{16}\text{H}_{22}\text{NO}_6^+$  ( $[\text{M}+\text{H}]^+$ ): 324.1442, found 324.1437.

**(2S,3R)-ethyl-2-acetamido-3-acetoxy-3-(4-chlorophenyl)propanoate (2e)**

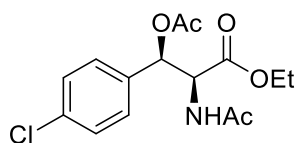

White solid; 16.1 mg; 98% yield; >99% ee;  $[\alpha]_D^{20} = -14.61$  ( $c = 0.70$ ,  $\text{CHCl}_3$ ); The enantiomeric excess was determined by HPLC on Chiralpak OD-H column,

hexane: isopropanol = 95:5; flow rate = 1.0 mL/min; UV detection at 210 nm;  $t_R$  = 21.8 min (major), 29.3 min (minor).  $^1\text{H}$  NMR (400 MHz,  $\text{CDCl}_3$ )  $\delta$  = 7.30-7.33 (m, 2H), 7.22-7.25 (m, 2H), 6.24 (d,  $J$  = 4.0 Hz, 1H), 6.11 (d,  $J$  = 9.3 Hz, 1H), 5.05 (dd,  $J$  = 9.4 Hz, 4.0 Hz, 1H), 4.16 (q,  $J$  = 7.1 Hz, 2H), 2.12 (s, 3H), 1.95 (s, 3H), 1.22 (t,  $J$  = 7.1 Hz, 3H);  $^{13}\text{C}$  NMR (101 MHz,  $\text{CDCl}_3$ )  $\delta$  = 169.83, 169.38, 169.35, 134.57, 134.55, 128.79, 127.69, 74.14, 62.14, 56.05, 23.02, 20.85, 14.06. ESI-HRMS calculated for  $\text{C}_{15}\text{H}_{19}\text{NO}_5\text{Cl}^+$  ( $[\text{M}+\text{H}]^+$ ): 328.0946, found 328.0943.

**(2*S*,3*R*)-ethyl-2-acetamido-3-acetoxy-3-(4-fluorophenyl)propanoate (2f)**

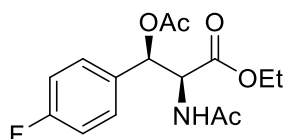

White solid; m. p. 167-169 °C; 15.4 mg; 99% yield; >99% ee;  $[\alpha]_D^{20}$  = -17.43 ( $c$  = 0.70,  $\text{CHCl}_3$ ); The enantiomeric excess was determined by HPLC on Chiralpak OJ-H column, hexane: isopropanol = 95:5; flow rate = 1.0 mL/min; UV detection at 210 nm;  $t_R$  = 23.6 min (major), 32.7 min (minor).  $^1\text{H}$  NMR (400 MHz,  $\text{CDCl}_3$ )  $\delta$  = 7.34 – 7.27 (m, 1H), 7.15 – 6.98 (m, 1H), 6.25 (d,  $J$ =4.2, 1H), 6.13 (d,  $J$ =9.3, 1H), 5.05 (dd,  $J$ =9.4, 4.2, 1H), 4.16 (q,  $J$ =7.1, 1H), 2.13 (s, 1H), 1.96 (s, 1H), 1.21 (t,  $J$ =7.1, 1H);  $^{13}\text{C}$  NMR (101 MHz,  $\text{CDCl}_3$ )  $\delta$  = 169.80, 169.45, 169.42, 163.96, 161.50, 131.87, 131.84, 128.22, 128.13, 115.68, 115.46, 74.15, 62.07, 56.23, 23.01, 20.87, 14.04. ESI-HRMS calculated for  $\text{C}_{15}\text{H}_{19}\text{NO}_5\text{F}^+$  ( $[\text{M}+\text{H}]^+$ ): 312.1242, found 312.1233.

**(2*S*,3*R*)-ethyl-2-acetamido-3-acetoxy-3-(4-isobutylphenyl)propanoate (2g)**

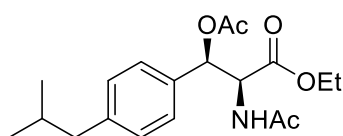

White solid; 16.8 mg; 96% yield; >99% ee;  $[\alpha]_D^{20}$  = -10.32 ( $c$  = 0.53,  $\text{CHCl}_3$ ); The enantiomeric excess was determined by HPLC on Chiralpak OJ-H column, hexane: isopropanol = 97:3; flow rate = 1.0 mL/min; UV detection at 210 nm;  $t_R$  = 19.1 min (major), 23.5 min (minor).  $^1\text{H}$  NMR (400 MHz,  $\text{CDCl}_3$ )  $\delta$  = 7.21 (d,  $J$  = 8.1 Hz, 2H), 7.11 (d,  $J$  = 8.1 Hz, 2H), 6.25 (d,  $J$  = 4.5 Hz, 1H), 6.12 (d,  $J$  = 9.2 Hz, 1H), 5.04 (dd,  $J$  = 9.3 Hz, 4.5 Hz, 1H), 4.12 (q,  $J$  = 7.1 Hz, 2H), 2.45 (d,  $J$  = 7.2 Hz, 2H), 2.13 (s, 3H), 1.95 (s, 3H), 1.81-1.85 (m, 1H), 1.18 (t,  $J$  = 7.1 Hz, 1H), 0.87-0.89 (m, 6H);  $^{13}\text{C}$  NMR (101 MHz,  $\text{CDCl}_3$ )  $\delta$  = 169.84, 169.67, 142.28, 133.12, 129.27,

126.16, 74.63, 61.89, 56.46, 45.11, 30.20, 23.05, 22.39, 22.35, 20.95, 14.01.  
ESI-HRMS calculated for  $C_{19}H_{28}NO_5^+$  ( $[M+H]^+$ ): 350.1962, found 350.1954.

**(2*S*,3*R*)-ethyl-2-acetamido-3-acetoxy-3-(3-methoxyphenyl)propanoate (2h)**

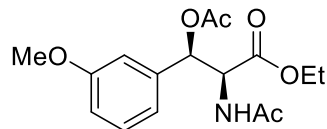

White solid; m. p. 134-135 °C; 15.7 mg; 97% yield; >99% ee;  $[\alpha]_D^{20} = -16.13$  ( $c = 0.50$ ,  $CHCl_3$ ); The enantiomeric excess was determined by HPLC on Chiralpak OJ-H column, hexane: isopropanol = 95:5; flow rate = 1.0 mL/min; UV detection at 210 nm;  $t_R = 31.1$  min (major), 37.4 min (minor).  $^1H$  NMR (400 MHz,  $CDCl_3$ )  $\delta = 7.24$ -7.28 (m, 1H), 6.83-6.90 (m, 3H), 6.25 (d,  $J = 4.0$  Hz, 1H), 6.10 (d,  $J = 9.3$  Hz, 1H), 5.06 (dd,  $J = 9.3$  Hz, 4.0 Hz, 1H), 4.16 (q,  $J = 7.1$  Hz, 2H), 3.80 (s, 3H), 2.13 (s, 3H), 1.96 (s, 3H), 1.22 (t,  $J = 7.1$  Hz, 3H);  $^{13}C$  NMR (101 MHz,  $CDCl_3$ )  $\delta = 168.78$ , 168.46, 168.41, 158.59, 136.45, 128.60, 117.47, 112.66, 111.12, 73.41, 60.92, 55.24, 54.25, 21.99, 19.82, 12.98. ESI-HRMS calculated for  $C_{16}H_{22}NO_6^+$  ( $[M+H]^+$ ): 324.1442, found 324.1439.

**(2*S*,3*R*)-ethyl-2-acetamido-3-acetoxy-3-(3-fluorophenyl)propanoate (2i)**

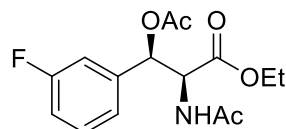

Pale oil; 14.9 mg; 96% yield; >99% ee;  $[\alpha]_D^{20} = -27.87$  ( $c = 0.93$ ,  $CHCl_3$ ); The enantiomeric excess was determined by HPLC on Chiralpak OD-H column, hexane: isopropanol = 95:5; flow rate = 1.0 mL/min; UV detection at 210 nm;  $t_R = 23.4$  min (major), 32.2 min (minor).  $^1H$  NMR (400 MHz,  $CDCl_3$ )  $\delta = 7.29$ -7.33 (m, 1H), 7.10 (d,  $J = 7.8$  Hz, 1H), 6.99-7.09 (m, 2H), 6.27 (d,  $J = 3.8$  Hz, 1H), 6.14 (d,  $J = 9.3$  Hz, 1H), 5.07 (dd,  $J = 9.4$  Hz, 3.8 Hz, 1H), 4.18 (q,  $J = 7.1$  Hz, 2H), 2.14 (s, 3H), 1.96 (s, 3H), 1.24 (t,  $J = 7.1$  Hz, 3H);  $^{13}C$  NMR (101 MHz,  $CDCl_3$ )  $\delta = 169.85$ , 169.31, 163.97, 161.52, 138.63, 138.56, 130.26, 130.18, 122.01, 121.98, 115.68, 115.47, 113.43, 113.20, 74.04, 62.14, 56.09, 22.97, 20.81, 14.05. ESI-HRMS calculated for  $C_{15}H_{19}NO_5F^+$  ( $[M+H]^+$ ): 312.1242, found 312.1238.

**(2*S*,3*R*)-ethyl-2-acetamido-3-acetoxy-3-(2-fluorophenyl)propanoate (2j)**

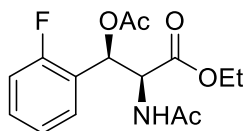

Pale oil; 15.1 mg; 97% yield; >99% ee;  $[\alpha]_D^{20} = -26.43$  ( $c = 0.70$ ,  $\text{CHCl}_3$ ); The enantiomeric excess was determined by HPLC on Chiralpak OJ-H column, hexane: isopropanol = 95:5; flow rate = 1.0 mL/min; UV detection at 210 nm;  $t_R = 25.5$  min (major), 30.6 min (minor).  $^1\text{H}$  NMR (400 MHz,  $\text{CDCl}_3$ )  $\delta = 7.25\text{--}7.29$  (m, 2H), 7.06–7.13 (m, 2H), 6.55 (d,  $J = 3.6$  Hz, 1H), 6.16 (d,  $J = 9.3$  Hz, 1H), 5.15 (dd,  $J = 9.4$  Hz, 3.6 Hz, 1H), 4.20 (q,  $J = 7.1$  Hz, 2H), 2.13 (s, 3H), 1.92 (s, 3H), 1.25 (t,  $J = 7.1$  Hz, 3H);  $^{13}\text{C}$  NMR (101 MHz,  $\text{CDCl}_3$ )  $\delta = 169.74, 169.29, 169.13, 161.00, 158.54, 130.34, 130.26, 127.28, 127.25, 124.04, 124.01, 123.69, 123.56, 115.79, 115.58, 69.85, 69.83, 62.12, 55.06, 22.94, 20.76, 14.07$ . ESI-HRMS calculated for  $\text{C}_{15}\text{H}_{19}\text{NO}_5\text{F}^+$  ( $[\text{M}+\text{H}]^+$ ): 312.1242, found 312.1233.

**(2S,3R)-ethyl-2-acetamido-3-acetoxy-3-(naphthalen-2-yl)propanoate (2k)**

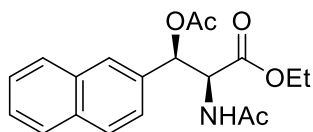

White solid; 17.1 mg; 99% yield; >99% ee;  $[\alpha]_D^{20} = -4.88$  ( $c = 0.47$ ,  $\text{CHCl}_3$ ); The enantiomeric excess was determined by HPLC on Chiralpak OD-H column, hexane: isopropanol = 95:5; flow rate = 1.0 mL/min; UV detection at 210 nm;  $t_R = 32.6$  min (major), 46.9 min (minor).  $^1\text{H}$  NMR (400 MHz,  $\text{CDCl}_3$ )  $\delta = 7.81\text{--}7.85$  (m, 3H), 7.75 (s, 1H), 7.42–7.50 (m, 3H), 6.45 (d,  $J = 4.2$  Hz, 1H), 6.18 (d,  $J = 9.3$  Hz, 1H), 5.18 (dd,  $J = 9.3$  Hz, 4.2 Hz, 1H), 4.14 (q,  $J = 7.1$  Hz, 2H), 2.18 (s, 3H), 1.93 (s, 3H), 1.16 (t,  $J = 7.1$  Hz, 3H);  $^{13}\text{C}$  NMR (101 MHz,  $\text{CDCl}_3$ )  $\delta = 169.88, 169.59, 169.58, 133.34, 133.26, 132.96, 128.52, 128.05, 127.81, 126.50, 125.61, 123.78, 74.81, 62.01, 56.33, 23.03, 20.95, 14.00$ . ESI-HRMS calculated for  $\text{C}_{19}\text{H}_{22}\text{NO}_5^+$  ( $[\text{M}+\text{H}]^+$ ): 344.1492, found 344.1490.

**(2S,3R)-methyl-2-acetamido-3-acetoxy-3-(3,4-dimethoxyphenyl)propanoate (2l)**

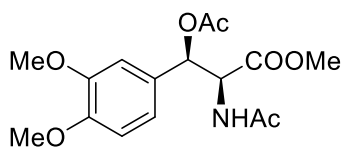

White solid; m. p. 139-140 °C; 16.6 mg; 98% yield; >99% ee;  $[\alpha]_D^{20} = -7.75$  ( $c = 0.80$ ,  $\text{CHCl}_3$ ); The enantiomeric excess was determined by HPLC on Chiralpak OJ-H column, hexane: isopropanol = 80:20; flow rate = 1.0 mL/min; UV detection at 210 nm;  $t_R = 23.0$  min (minor), 35.8 min (major).  $^1\text{H}$  NMR (400 MHz,  $\text{CDCl}_3$ )  $\delta$  6.81-6.87 (m, 3H), 6.20 (d,  $J = 4.6$  Hz, 1H), 6.17 (d,  $J = 9.4$  Hz, 1H), 5.06 (dd,  $J = 9.3$ , 4.6 Hz, 1H), 3.88 (s, 3H), 3.87 (s, 3H), 3.68 (s, 3H), 2.13 (s, 3H), 1.99 (s, 3H);  $^{13}\text{C}$  NMR (101 MHz,  $\text{CDCl}_3$ )  $\delta$  170.16, 169.86, 169.71, 149.24, 148.97, 128.24, 118.93, 110.85, 109.48, 74.38, 56.32, 55.99, 55.86, 52.74, 23.06, 20.95. ESI-HRMS calculated for  $\text{C}_{16}\text{H}_{22}\text{NO}_7^+$  ( $[\text{M}+\text{H}]^+$ ): 340.1388, found 340.1386.

**(2*S*,3*R*)-methyl -2-acetamido-3-acetoxy-3-(3,4-bis(benzyloxy)phenyl)propanoate (2m)**

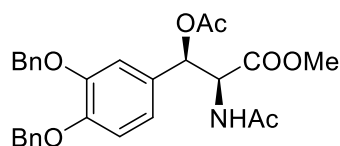

White solid; m. p. 89-94 °C; 24.3 mg; 99% yield; >99% ee;  $[\alpha]_D^{20} = -4.60$  ( $c = 1.00$ ,  $\text{CHCl}_3$ ); The enantiomeric excess was determined by HPLC on Chiralpak OD-H column, hexane: isopropanol = 80:20; flow rate = 1.0 mL/min; UV detection at 210 nm;  $t_R = 19.8$  min (major), 36.3 min (minor).  $^1\text{H}$  NMR (400 MHz,  $\text{CDCl}_3$ )  $\delta$  7.42-7.45 (m, 4H), 7.34-7.39 (m, 4H), 7.30-7.32 (m, 2H), 6.87-6.89 (m, 2H), 6.81 (dd,  $J = 8.4$ , 1.9 Hz, 1H), 6.14 (d,  $J = 4.5$  Hz, 1H), 6.08 (d,  $J = 9.2$  Hz, 1H), 5.14 (s, 1H), 5.00 (dd,  $J = 9.2$ , 4.5 Hz, 1H), 3.63 (s, 3H), 2.06 (s, 3H), 1.93 (s, 3H);  $^{13}\text{C}$  NMR (101 MHz,  $\text{CDCl}_3$ )  $\delta$  170.11, 169.85, 169.59, 149.21, 148.80, 137.08, 137.01, 128.87, 128.56, 128.54, 127.91, 127.89, 127.35, 127.28, 119.72, 114.44, 113.30, 74.17, 71.46, 71.07, 56.31, 52.70, 23.04, 20.89. ESI-HRMS calculated for  $\text{C}_{28}\text{H}_{30}\text{NO}_7^+$  ( $[\text{M}+\text{H}]^+$ ): 492.2014, found 492.2012.

**(2*S*,3*R*)-ethyl-2-acetamido-3-acetoxy-3-cyclopropylpropanoate (2n)**

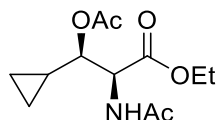

White solid; 12.5 mg; 97% yield; >99% ee;  $[\alpha]_D^{20} = -61.80$  ( $c = 0.23$ ,  $\text{CHCl}_3$ ); The enantiomeric excess was determined by GC on Gamma-Dex 225 column; flow rate = 2.0 mL/min; 160 °C isothermal;  $t_R = 33.4$  min (major), 33.7 min (minor).  $^1\text{H}$  NMR (400 MHz,  $\text{CDCl}_3$ )  $\delta$  6.22 (d,  $J = 9.1$  Hz, 1H), 4.97 (dd,  $J = 9.4$  Hz, 3.0 Hz, 1H),

4.65 (dd,  $J = 9.5, 3.0$  Hz, 1H), 4.16 (q,  $J = 7.2$  Hz, 2H), 2.11 (s, 3H), 2.06 (s, 3H), 1.25 (t,  $J = 7.1$  Hz, 3H), 1.05-1.11 (m, 1H), 0.39-0.66 (m, 4H);  $^{13}\text{C}$  NMR (101 MHz,  $\text{CDCl}_3$ )  $\delta$  170.28, 169.97, 169.95, 78.02, 61.91, 55.28, 23.26, 20.91, 14.08, 12.79, 4.26, 3.47. ESI-HRMS calculated for  $\text{C}_{12}\text{H}_{20}\text{NO}_5^+$  ( $[\text{M}+\text{H}]^+$ ): 258.1336, found 258.1335.

#### ethyl *N,O*-diacetyl-L-threoninate (**2o**)

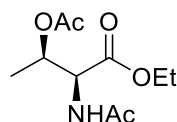

Yellow oil; 11.3 mg; 98% yield; >99% ee;  $[\alpha]_{\text{D}}^{20} = -62.33$  ( $c = 0.65$ ,  $\text{CHCl}_3$ ); The enantiomeric excess was determined by HPLC on Chiralpak OJ-H column, hexane: isopropanol = 95:5; flow rate = 1.0 mL/min; UV detection at 210 nm;  $t_{\text{R}} = 14.1$  min (major), 16.5 min (minor).  $^1\text{H}$  NMR (400 MHz,  $\text{CDCl}_3$ )  $\delta$  6.17 (d,  $J = 8.9$  Hz, 1H), 5.45 (m, 1H), 4.79 (dd,  $J = 9.4$  Hz, 2.6 Hz, 1H), 4.19 (q,  $J = 7.1$  Hz, 2H), 2.11 (s, 3H), 2.01 (s, 3H), 1.25-1.28 (m, 6H);  $^{13}\text{C}$  NMR (101 MHz,  $\text{CDCl}_3$ )  $\delta$  = 170.42, 169.95, 169.71, 70.56, 61.91, 55.40, 23.18, 20.92, 17.07, 14.07. MS calculated for  $\text{C}_{10}\text{H}_{18}\text{NO}_5^+$  ( $[\text{M}+\text{H}]^+$ ): 232.1, found 232.1.

#### 4. Procedure for the Synthesis of Compound 4

##### (2*S*,3*R*)-methyl -3-acetoxy-2-amino-3-(3,4-bis(benzyloxy)phenyl)propanoate (**3**)

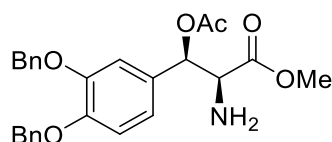



3H);  $^{13}\text{C}$  NMR (101 MHz,  $\text{CDCl}_3$ )  $\delta$  171.45, 166.93, 149.27, 149.21, 137.02, 136.97, 132.44, 128.56, 127.95, 127.91, 127.42, 127.24, 119.08, 114.84, 112.50, 83.03, 76.19, 71.42, 71.19, 52.80, 14.16. ESI-HRMS calculated for  $\text{C}_{26}\text{H}_{27}\text{NO}_6\text{Na}^+$  ( $[\text{M}+\text{Na}]^+$ ): 472.1731, found 472.1715.

**(2*S*,3*R*)-2-ammonio-3-(3,4-bis(benzyloxy)phenyl)-3-hydroxypropanoate (4)**

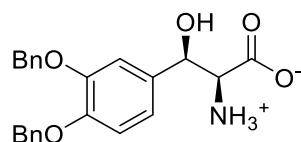

To a solution of **3** (37 mg, 0.08 mmol) in MeOH (2.0 mL) was added dropwise 2 N NaOH (2.0 mL) at 0 °C. The heterogeneous milky reaction mixture was stirred overnight at 40 °C. Then the mixture was cooled to 0 °C, and neutralized to pH 6-7 by slowly addition of 1 N HCl. The resulting white precipitate was filtered and washed with cold water and ether to give 30 mg (92%) of **4**.  $[\alpha]_{\text{D}}^{25} = +2.00$  ( $c = 0.20$ , DMSO).  $^1\text{H}$  NMR (400 MHz, DMSO- $d_6$ )  $\delta$  10.08 (d,  $J = 10.2$  Hz, 1H), 7.46 (m, 4H), 7.38 (m, 6H), 7.08 (d,  $J = 1.8$  Hz, 1H), 6.95 (d,  $J = 8.3$  Hz, 1H), 6.81 (dd,  $J = 8.3, 1.8$  Hz, 1H), 6.02 (d,  $J = 14.7$  Hz, 1H), 5.15 (s, 2H), 5.10 (s, 2H), 5.09 (s, 1H);  $^{13}\text{C}$  NMR (101 MHz, DMSO)  $\delta$  167.59, 149.00, 147.28, 137.87, 137.84, 130.54, 128.94, 128.83, 128.19, 128.03, 127.93, 122.91, 118.91, 115.24, 111.43, 111.19, 70.56, 70.42, 23.18, 22.89. ESI-HRMS calculated for  $\text{C}_{23}\text{H}_{24}\text{NO}_5^+$  ( $[\text{M}+\text{H}]^+$ ): 394.1649, found 394.1637.

Compared the optical rotation of **2m** with the literature<sup>[7]</sup>, the absolute configuration of **2** is determined as (2*S*,3*R*).

## 5. References

- [1] P. Borowiecki, M. Bretner, *Tetrahedron: Asymmetry* **2013**, 24, 925-936.
- [2] J. P. Genet, C. Pinel, S. Mallart, S. Juge, S. Thorimbert, J. A. Laffitte, *Tetrahedron-Asymmetry* **1991**, 2, 555-567.
- [3] H. Ryu, H. Kuriyama, H. Miyazato, S. Minakata, M. Komatsu, J. Y. Yoon, S. Kim, *Bull. Chem. Soc. Jpn.* **2004**, 77, 1407.
- [4] J. P. Burkhardt, J. R. Koehl, S. Mehdi, S. L. Durham, M. J. Janusz, E. W. Huber, et al. *J. Med. Chem.* **1995**, 38, 223-233.
- [5] T. Katoh, E. Itoh, T. Yoshino, S. Terashima, *Tetrahedron*, **1997**, 53, 10229-10238.
- [6] S. Hanessian, *Tetrahedron Lett.* **1967**, 1549-1552.

---

[7] B. Herbert, I. H. Kim and K. L. Kirk, *J. Org. Chem.* **2001**, 66, 4892-4897.

## 6. NMR spectra of (*E*)-1, 2 and 3, HPLC spectra or GC spectra of 2

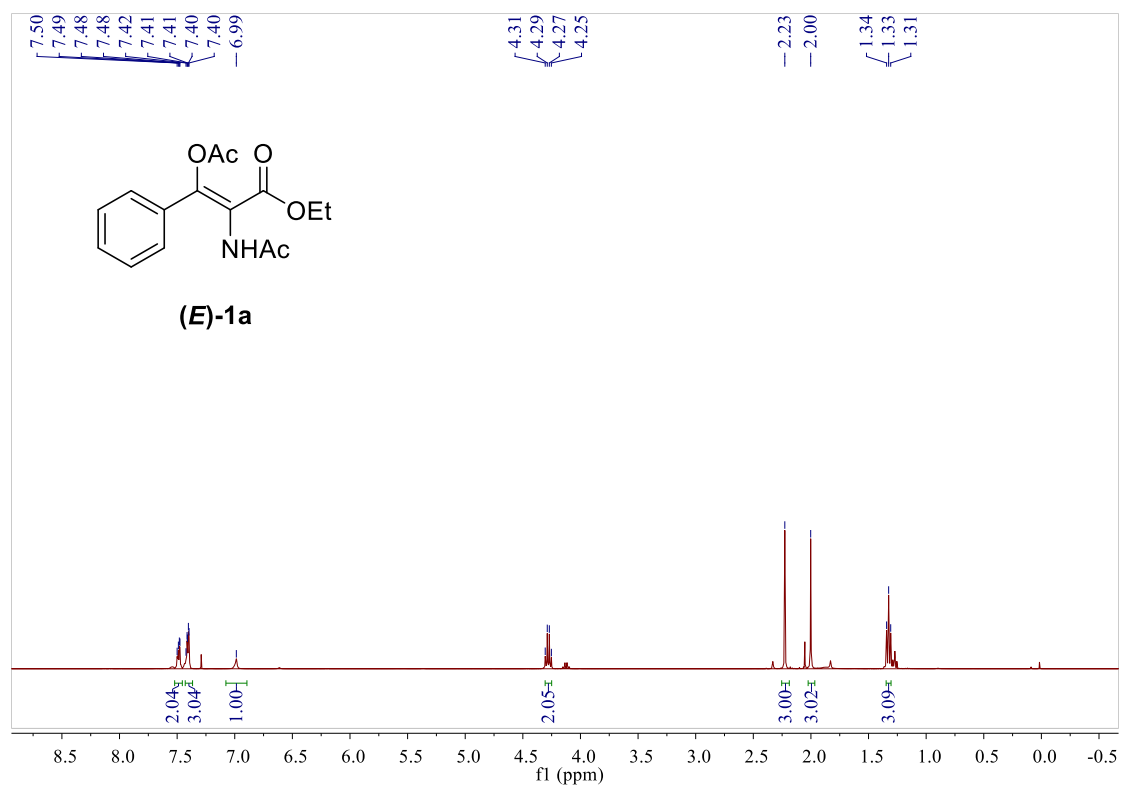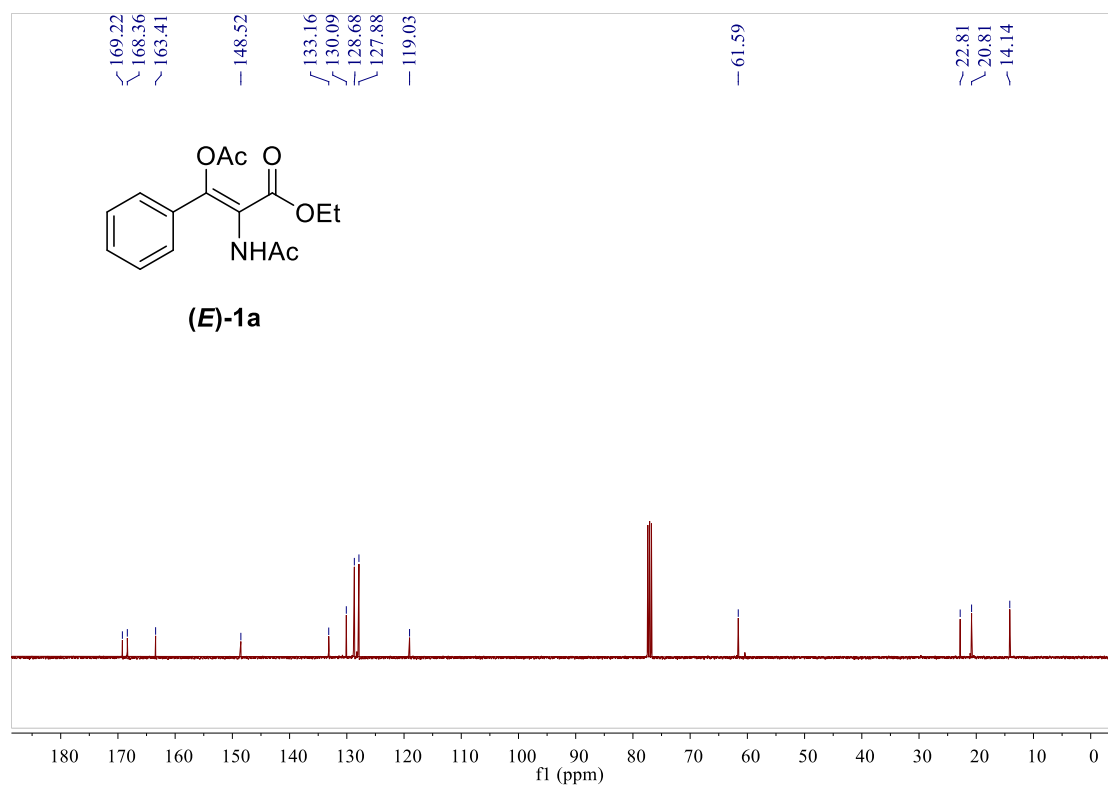

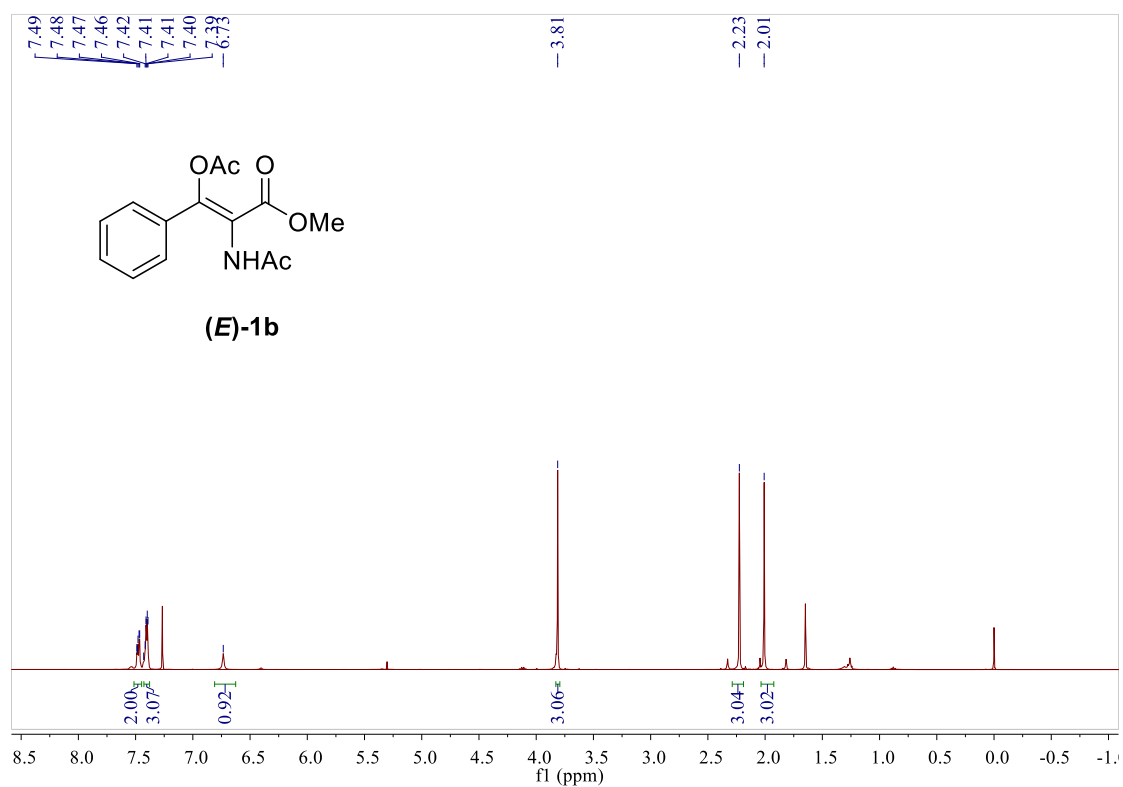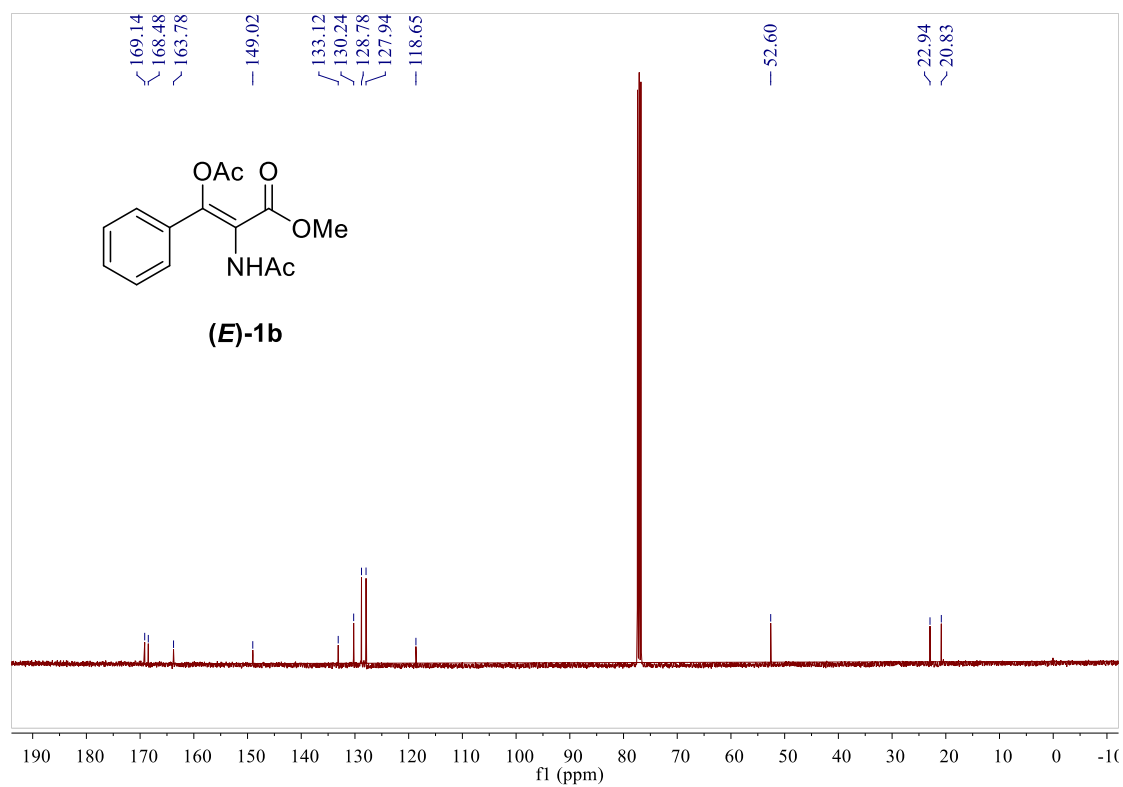

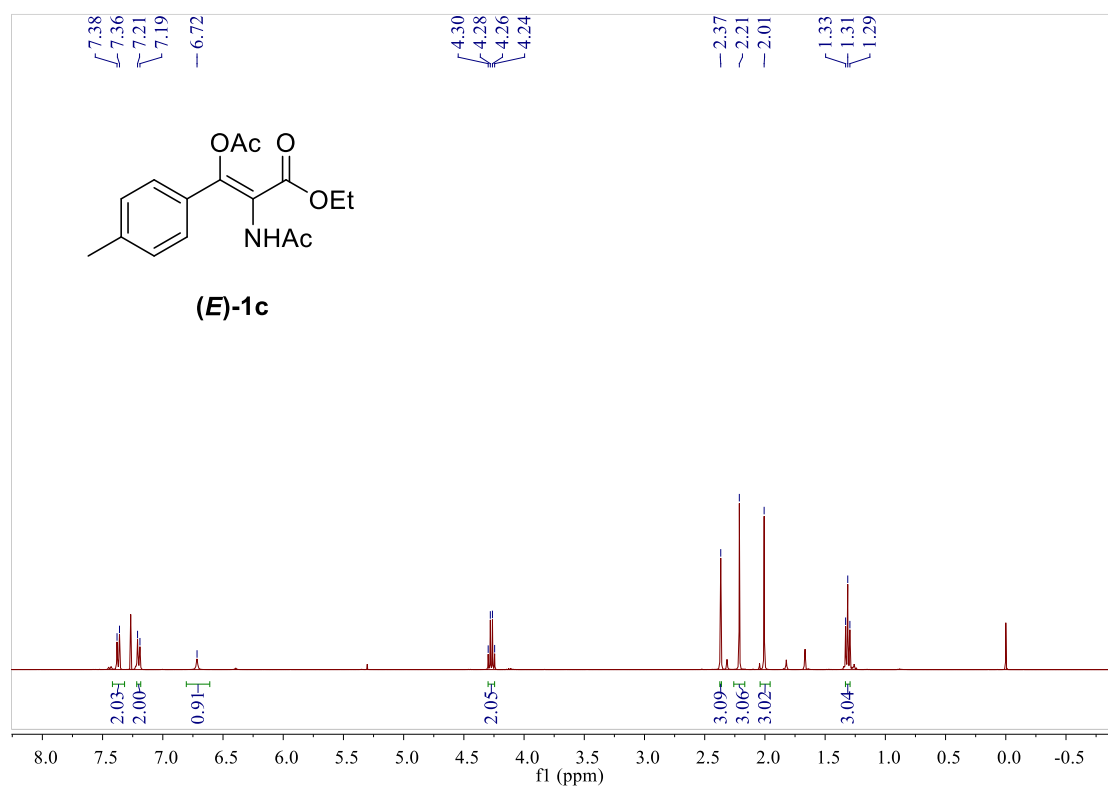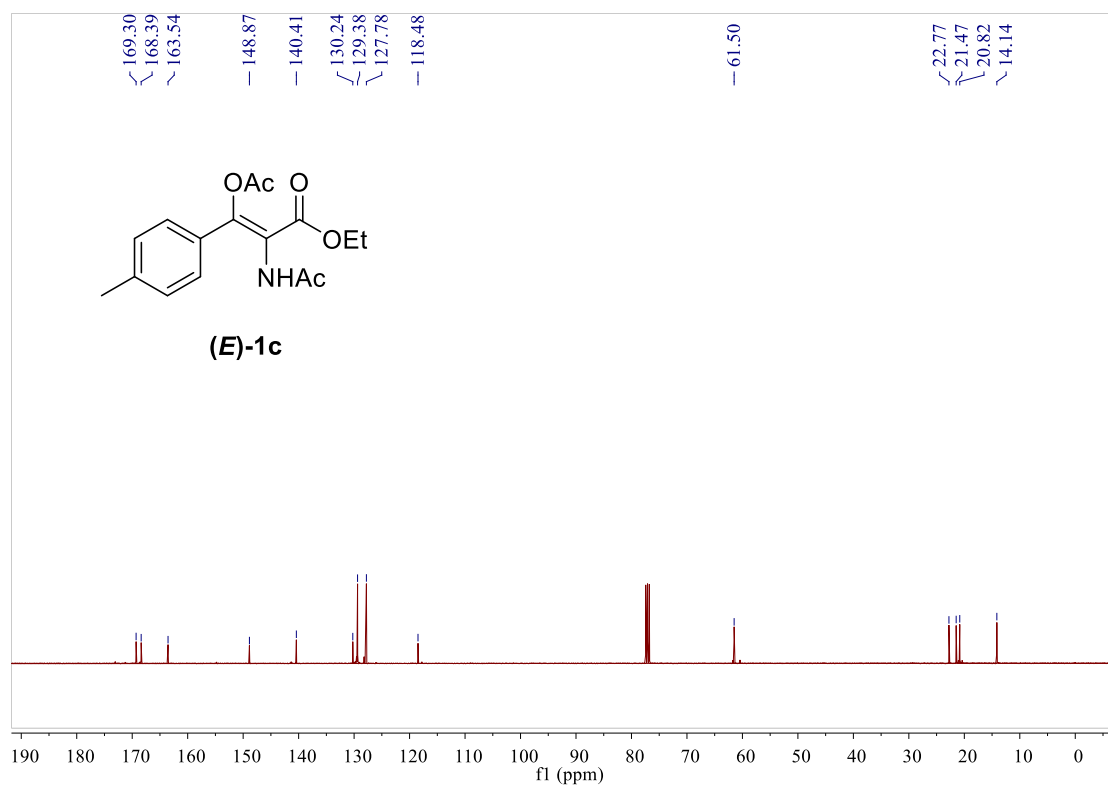

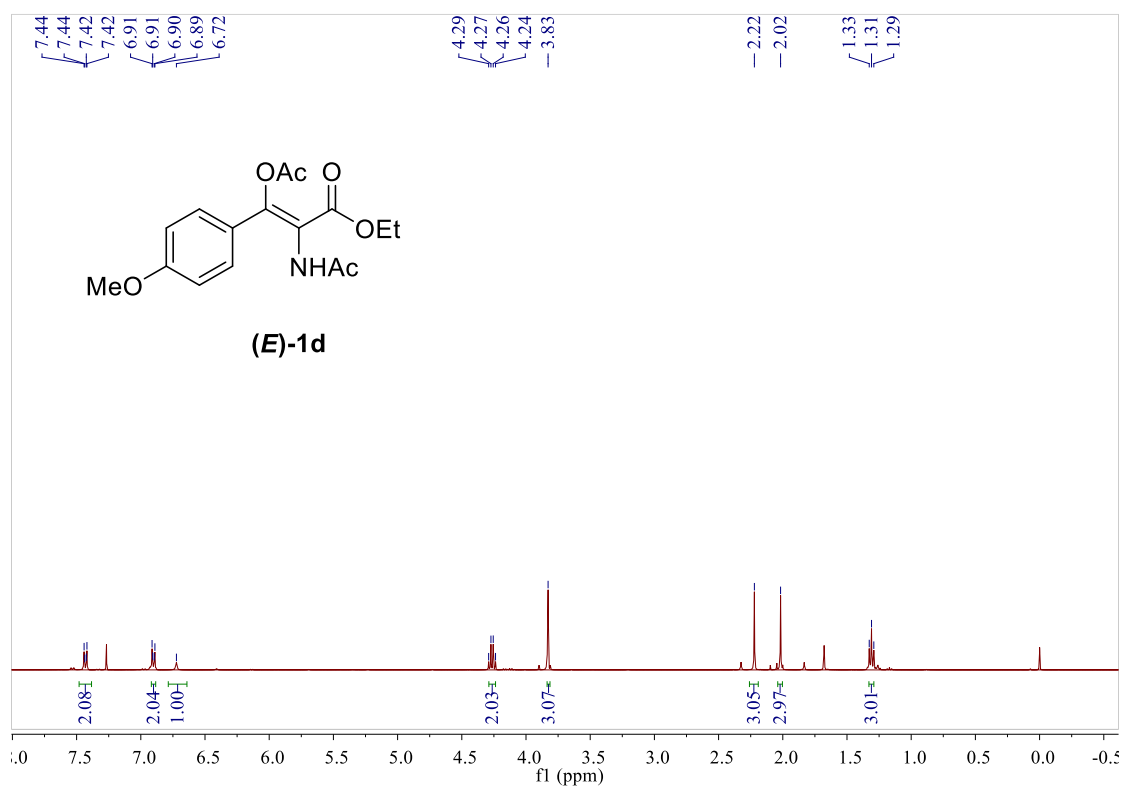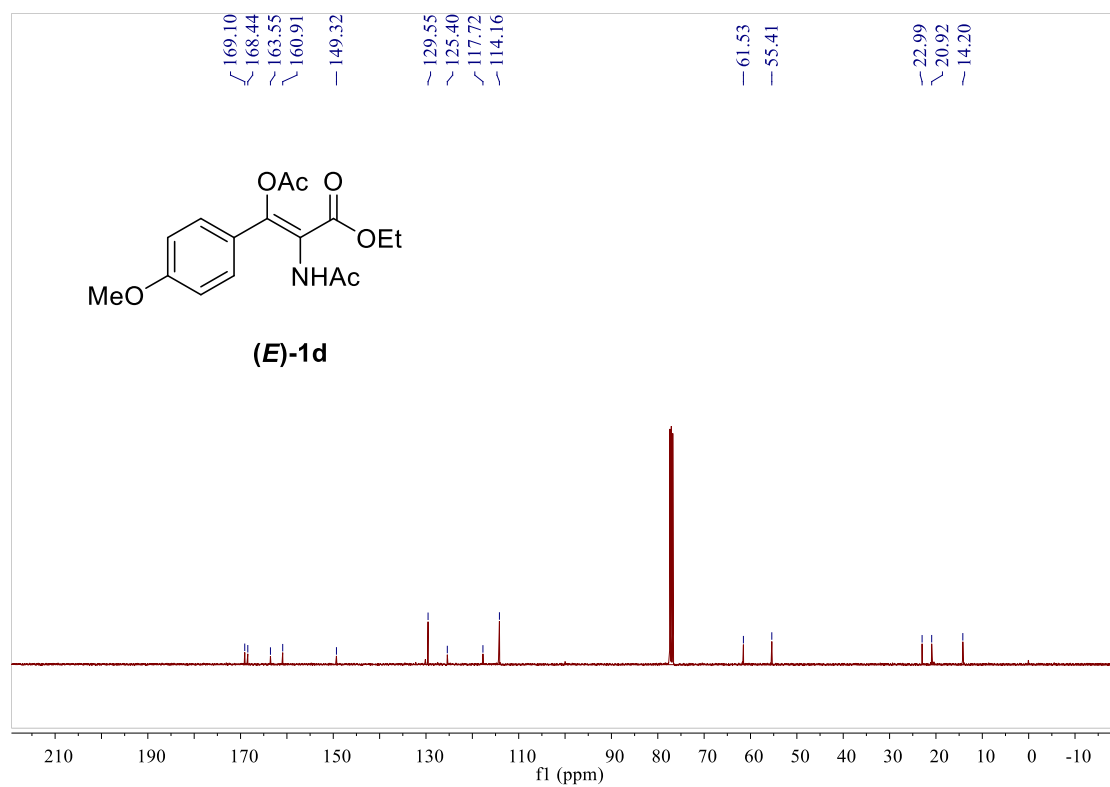

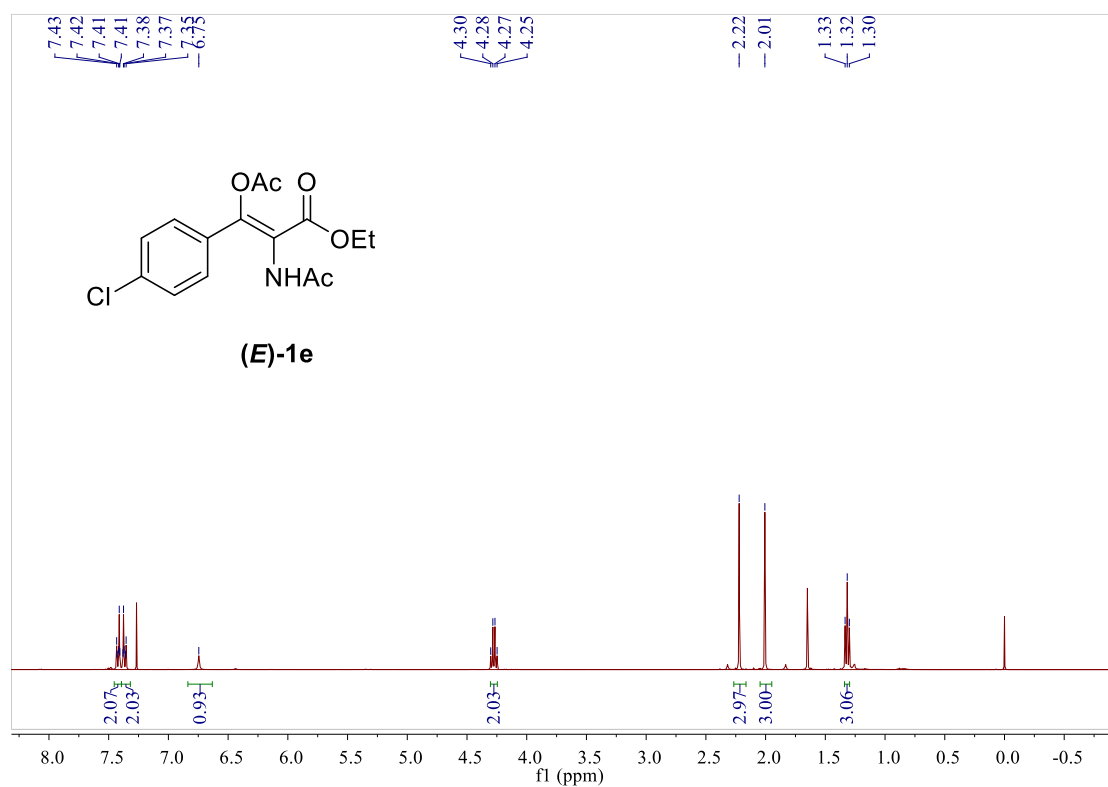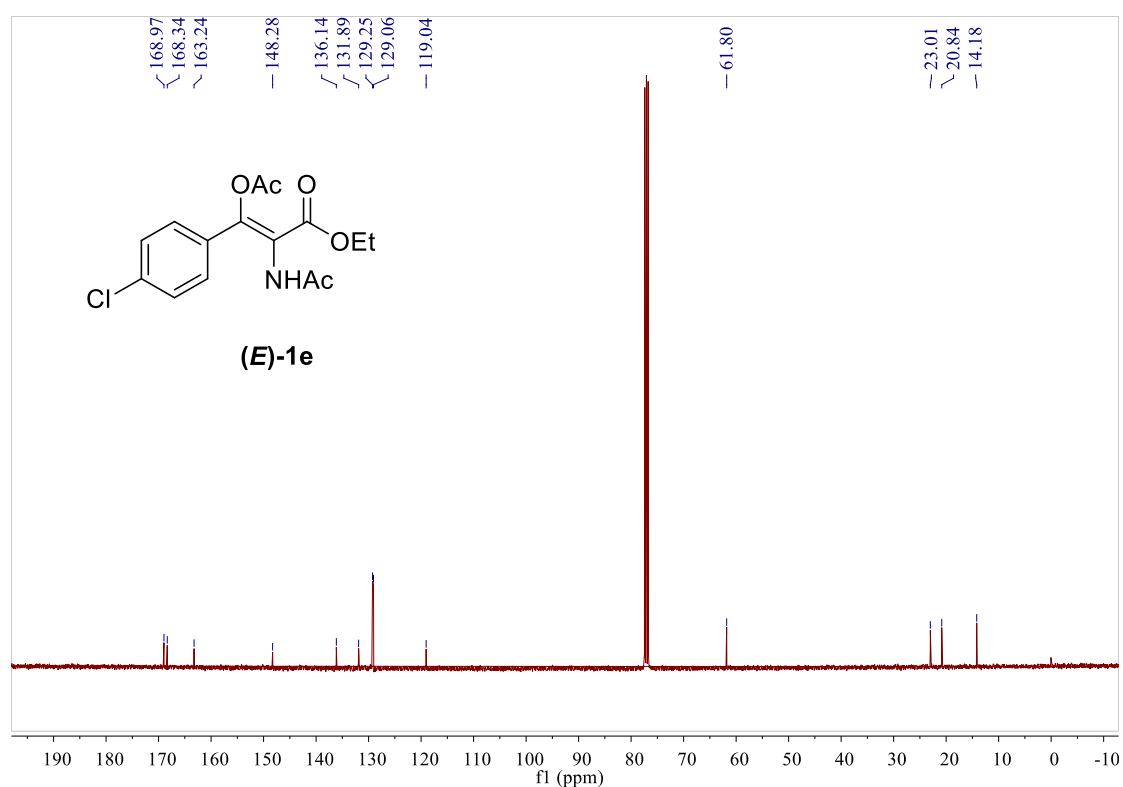

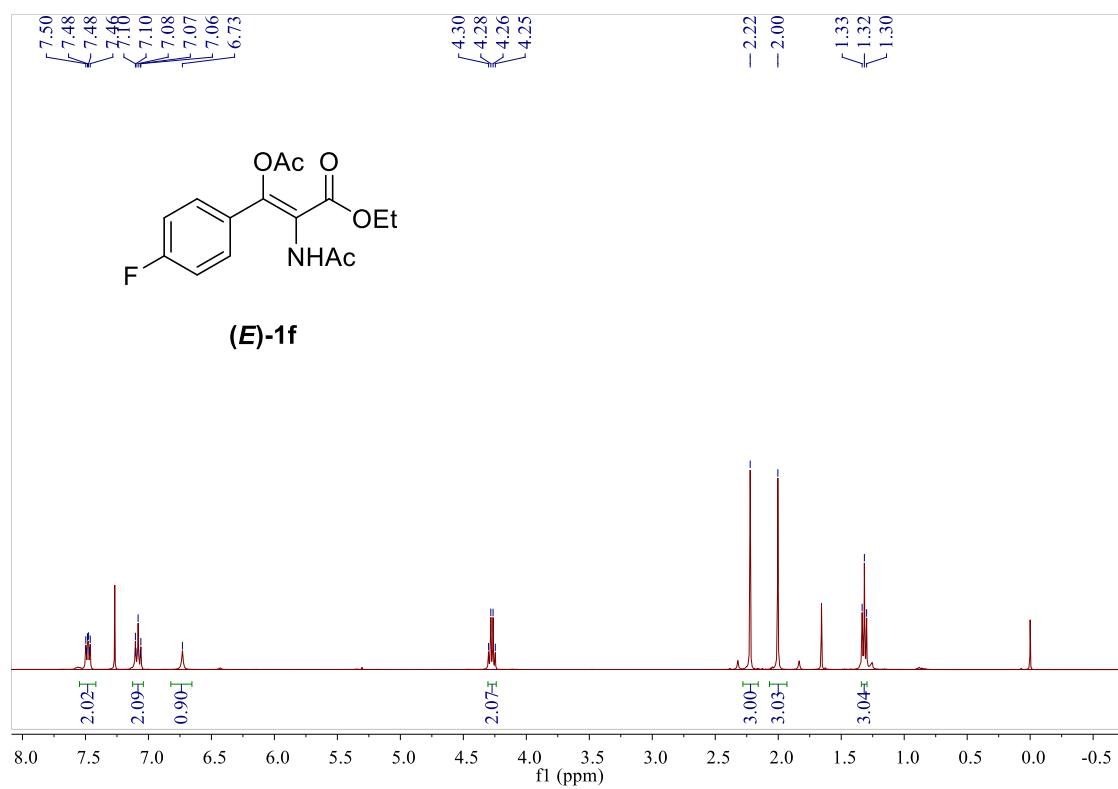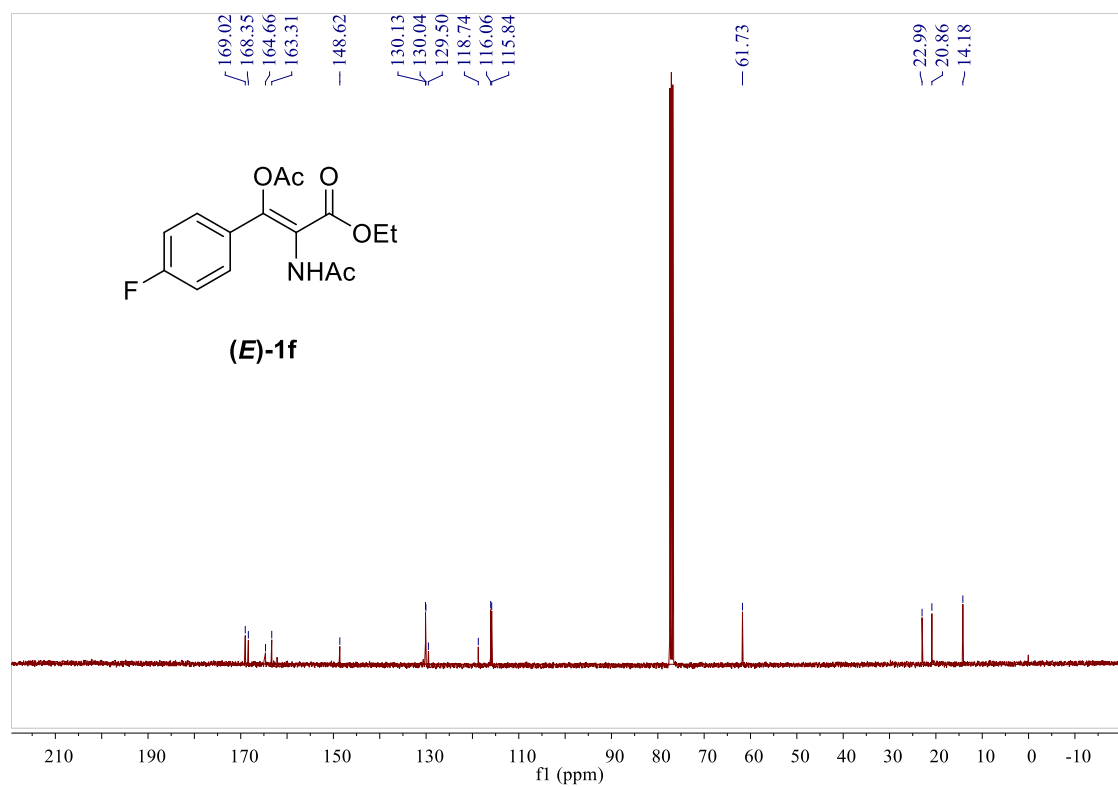



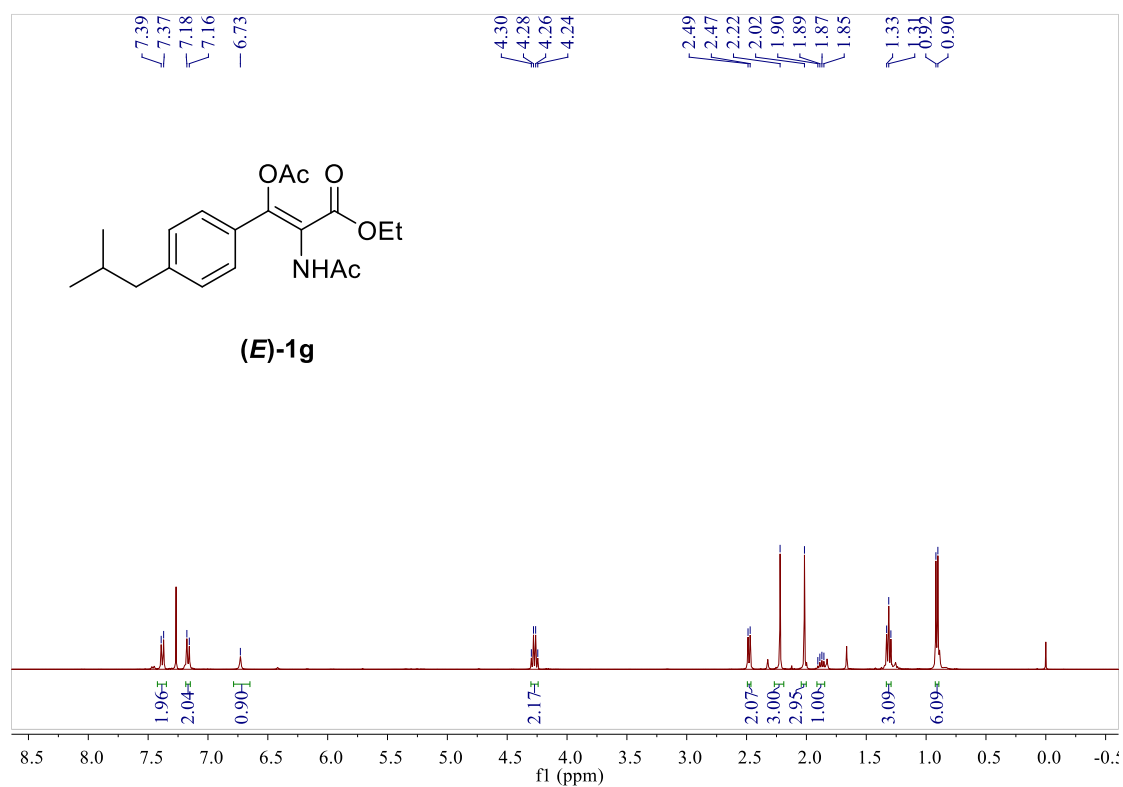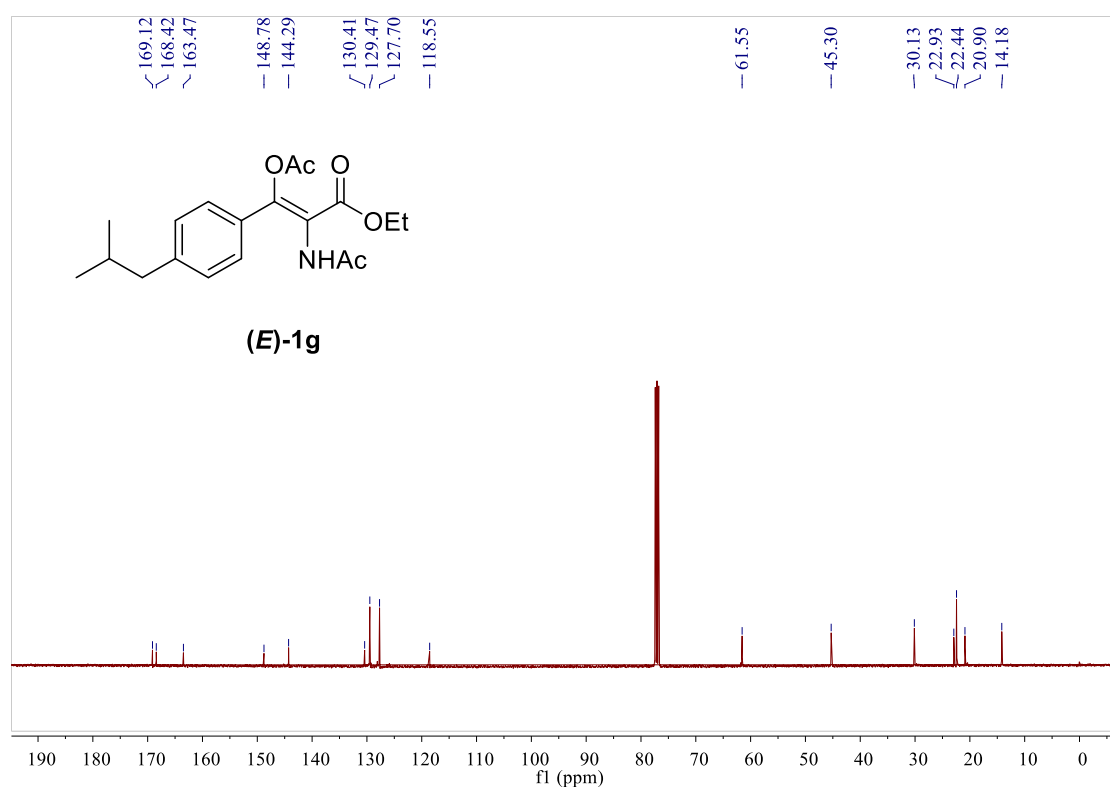

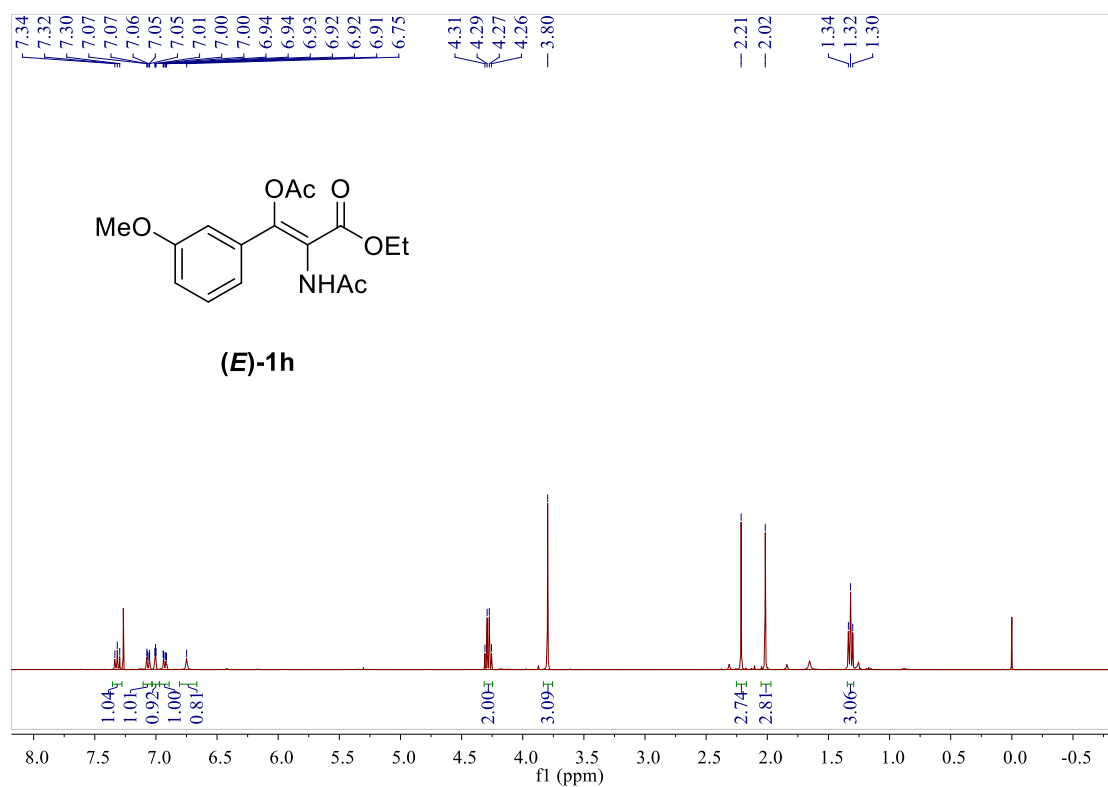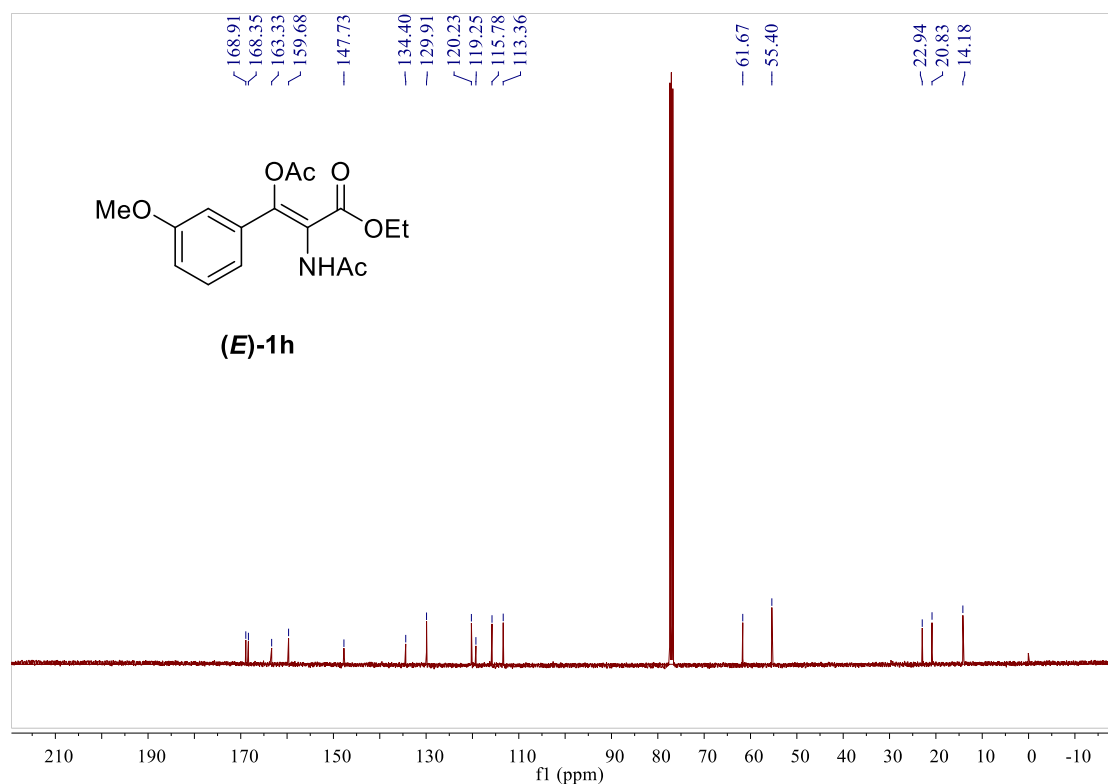

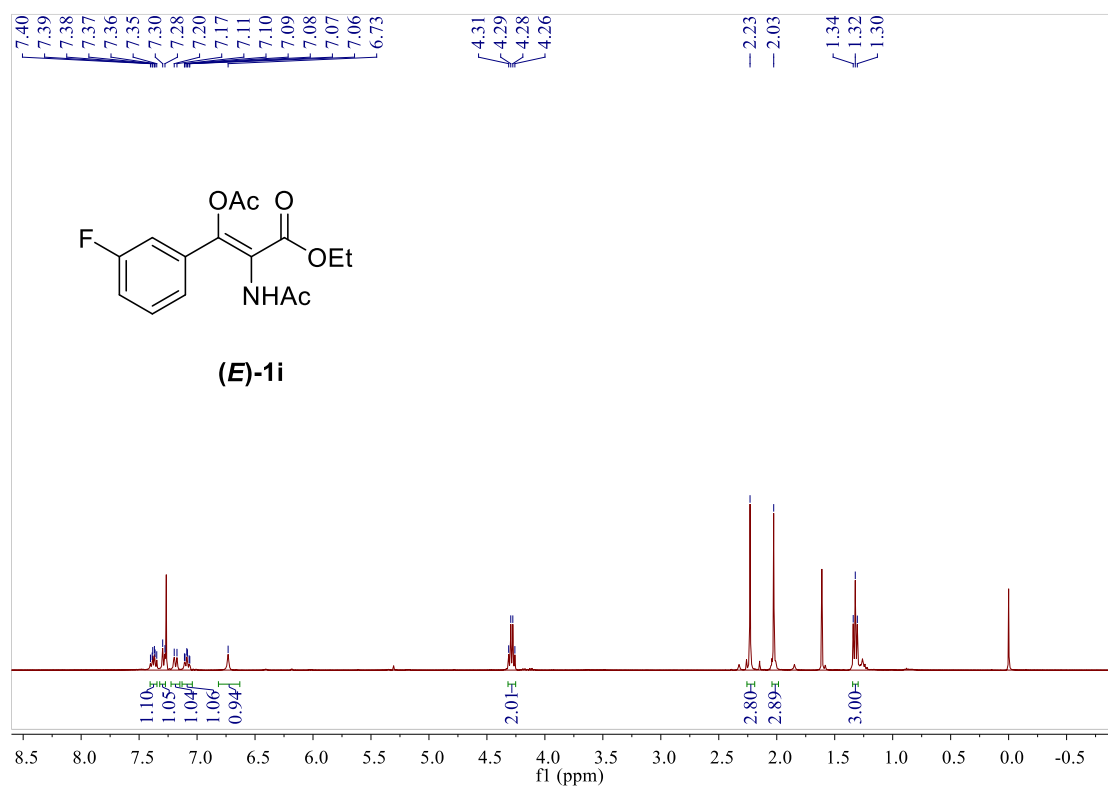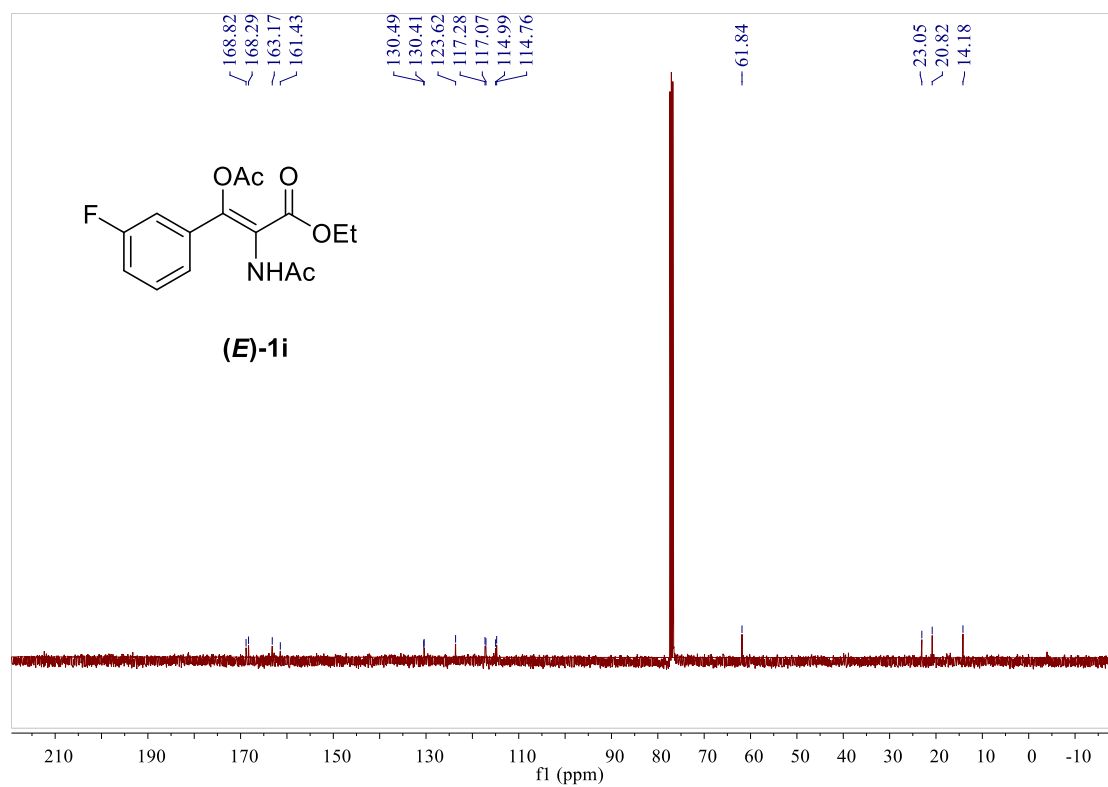

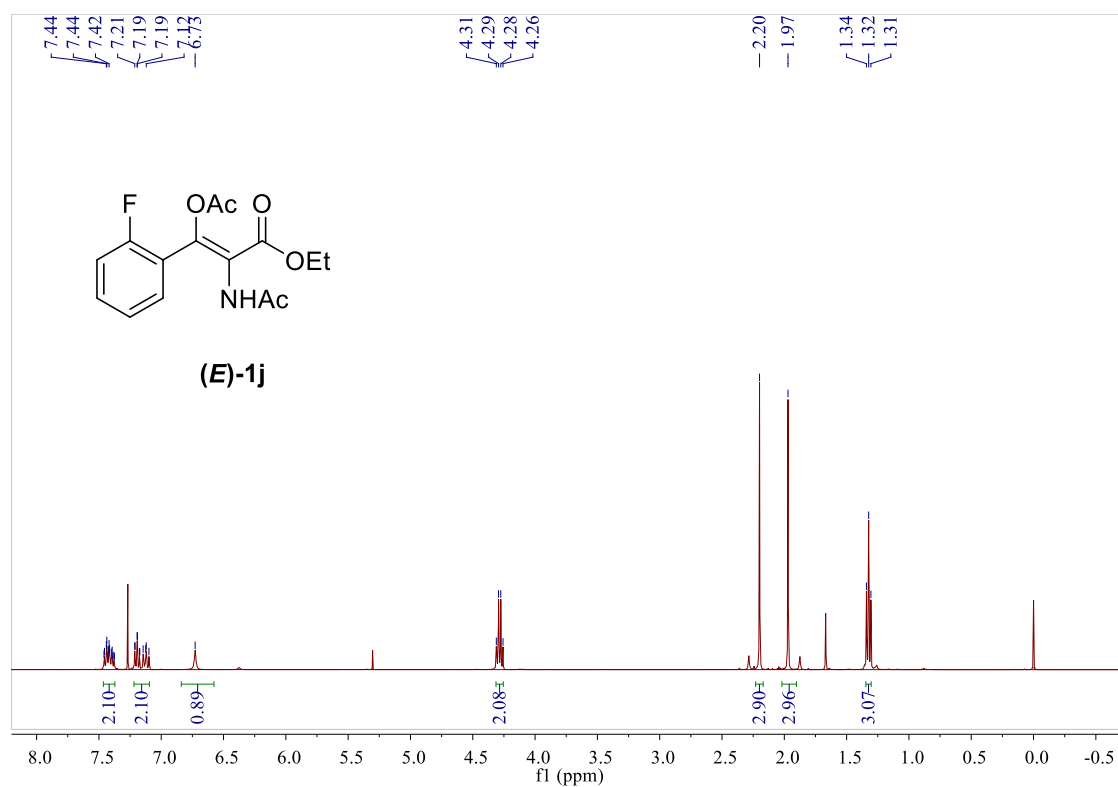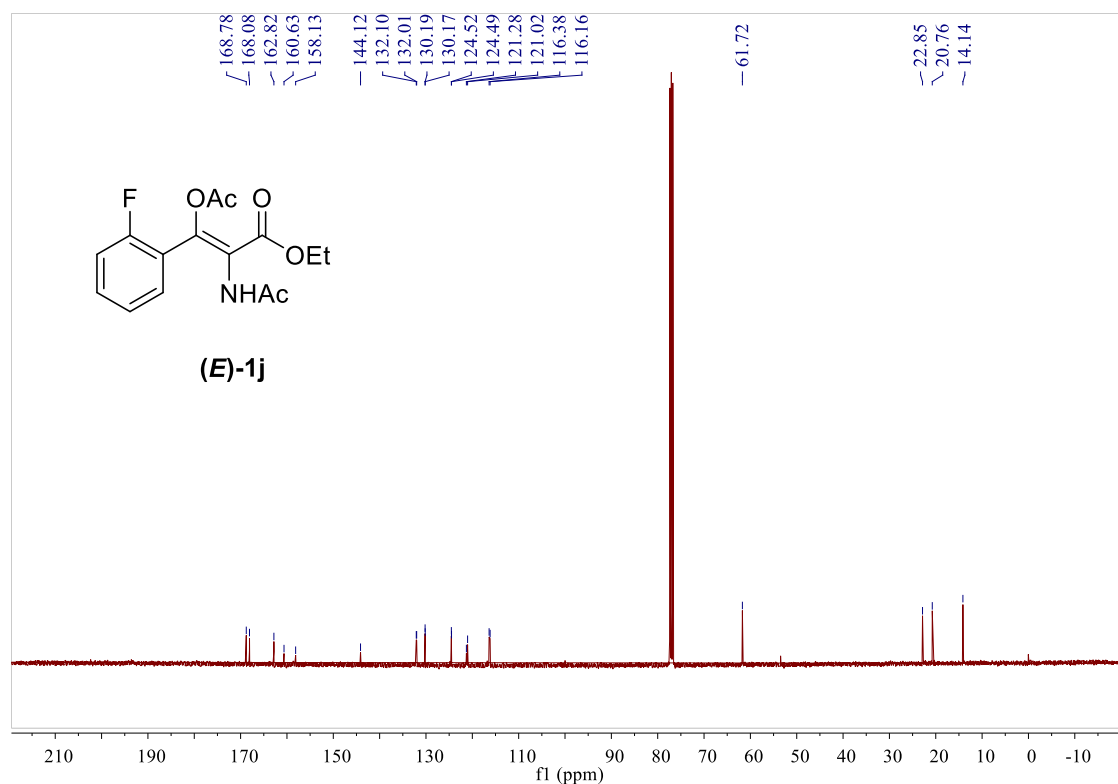

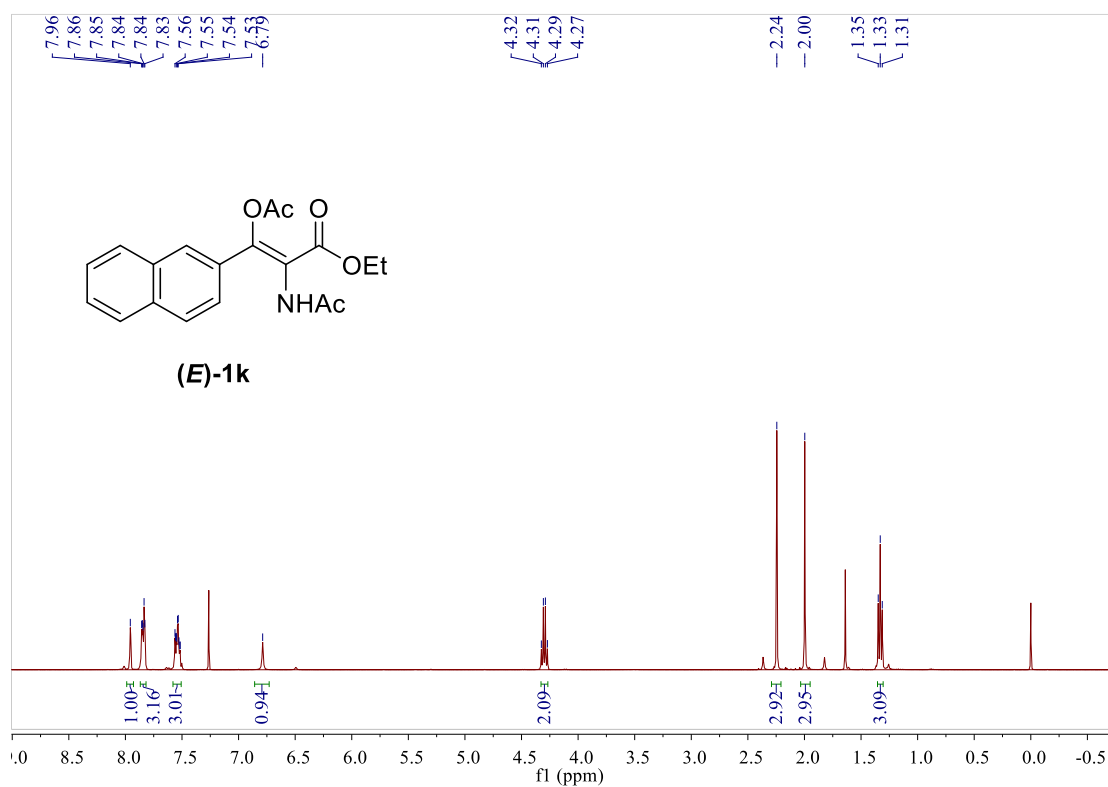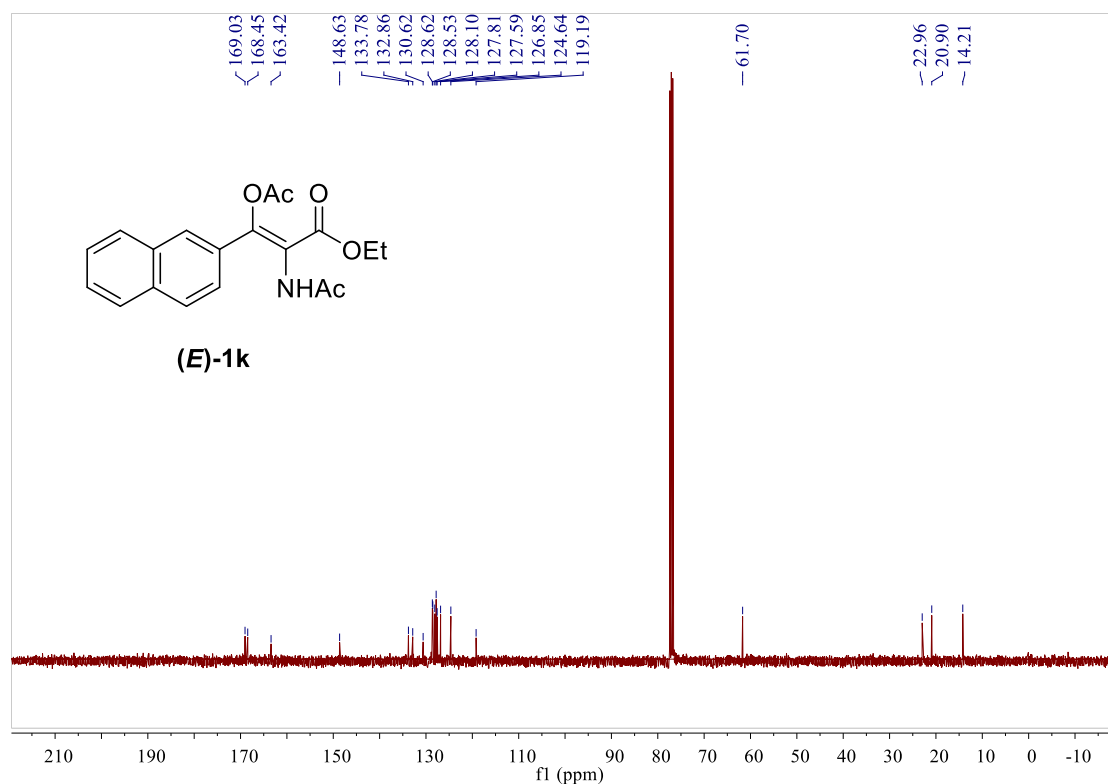

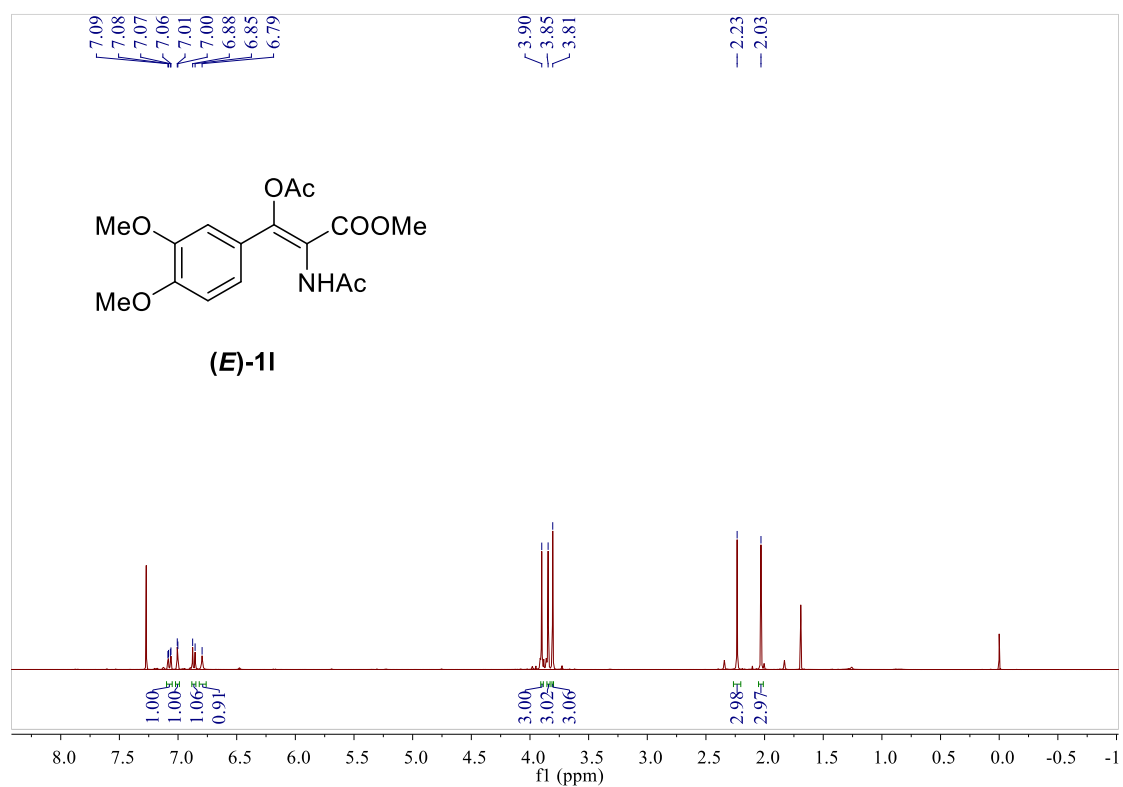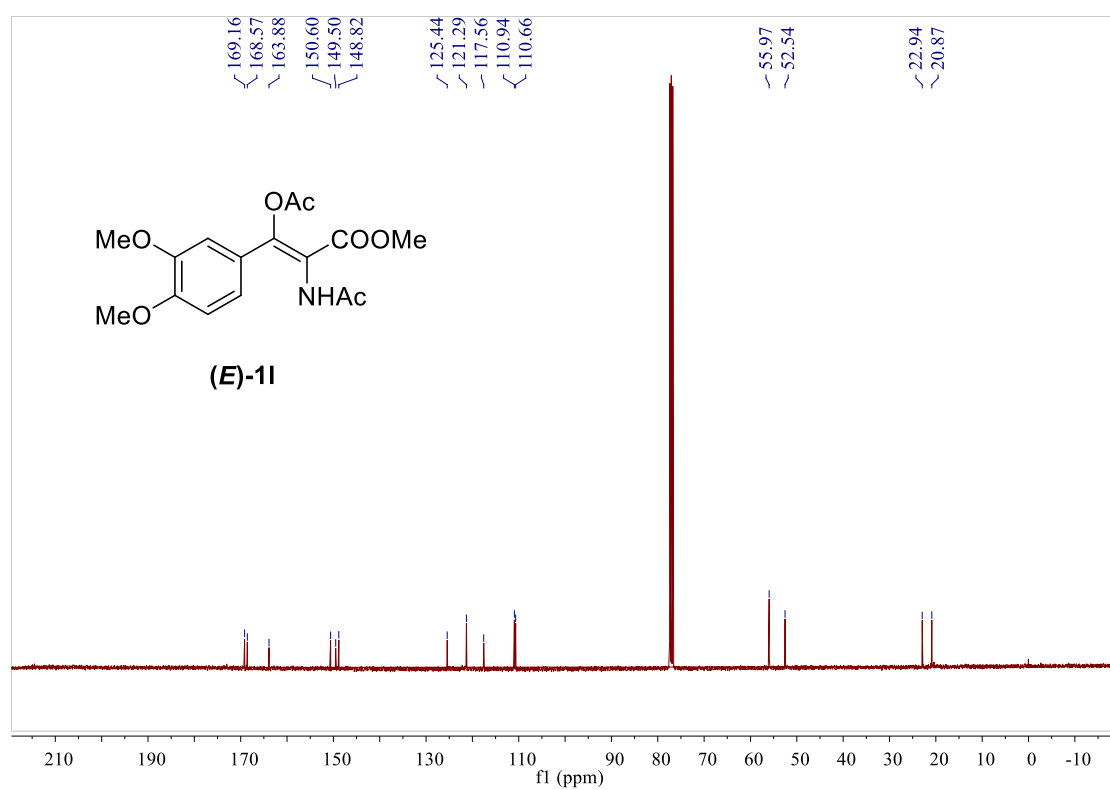

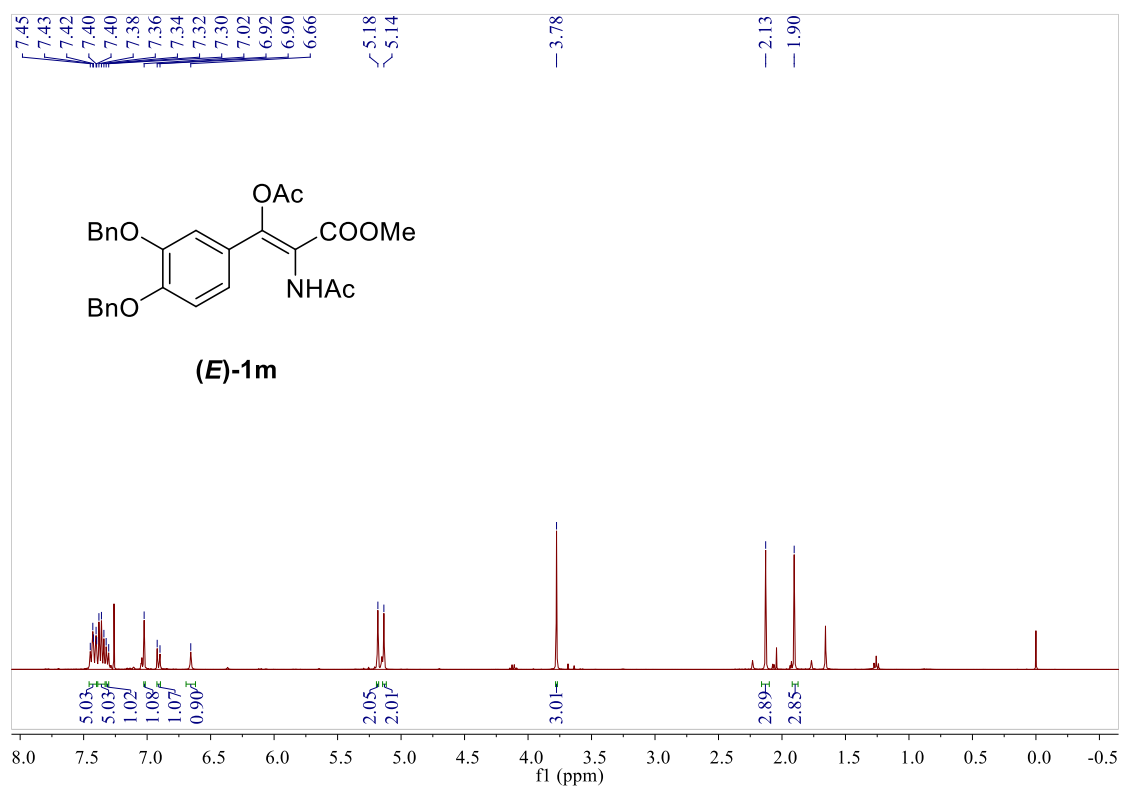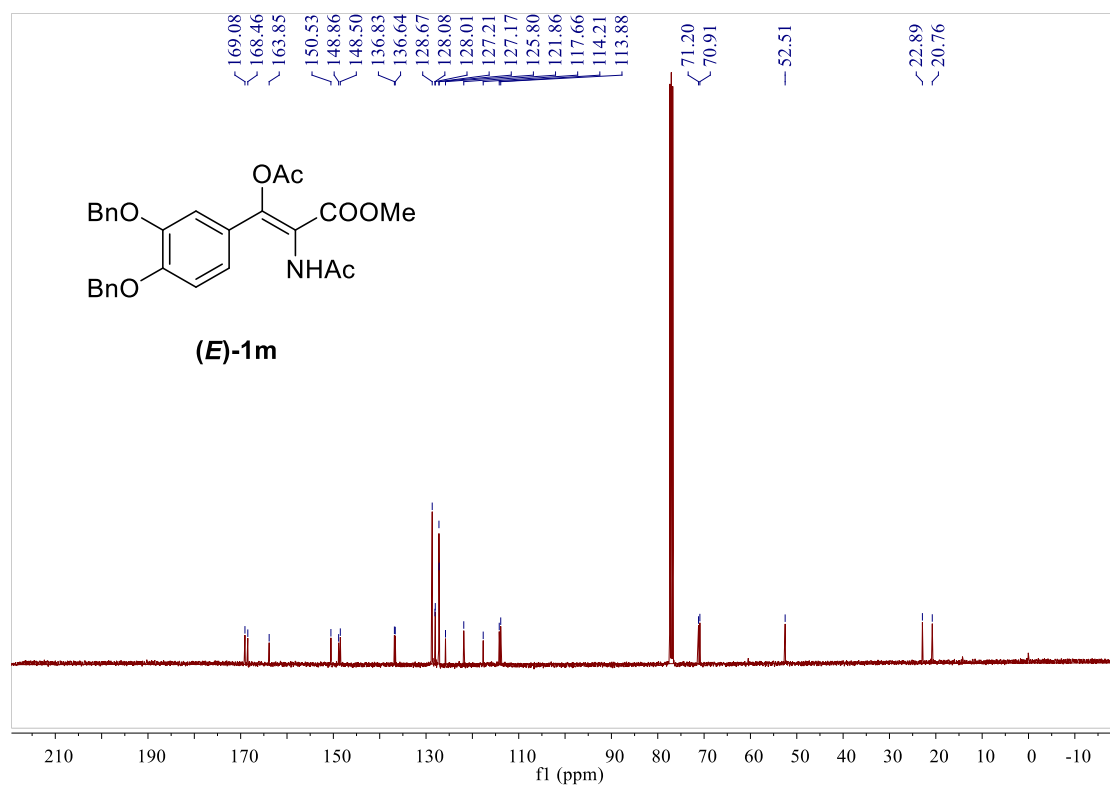

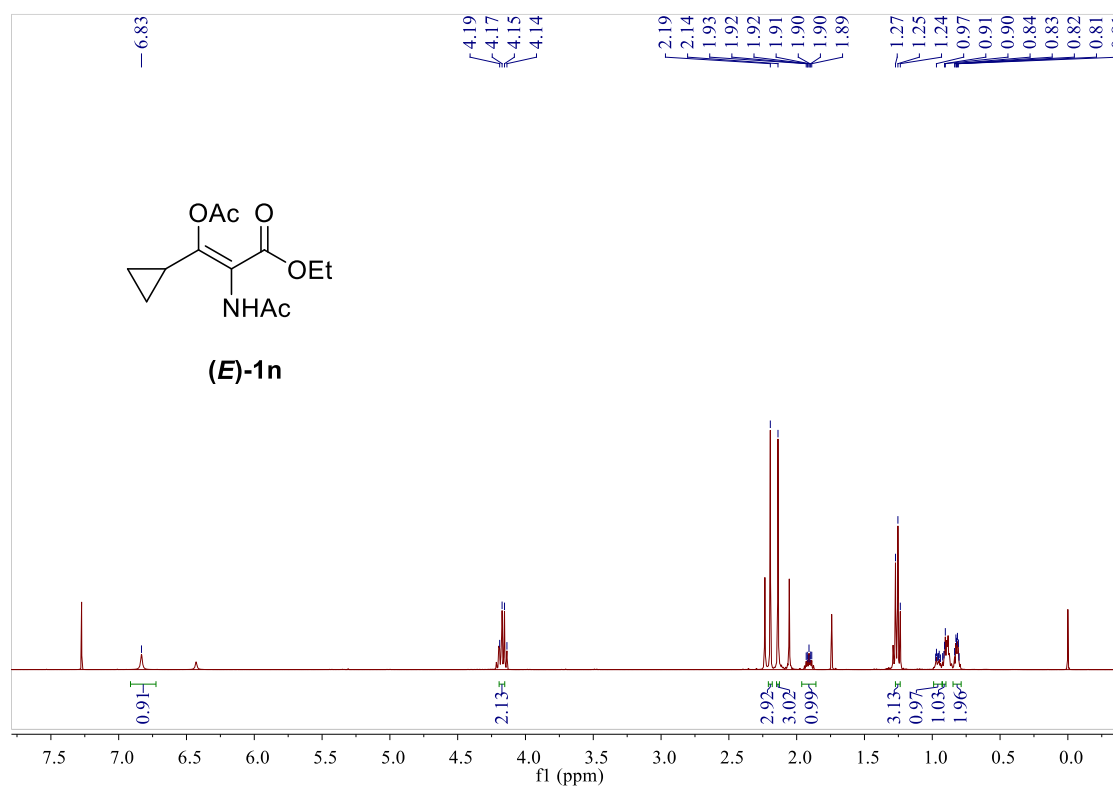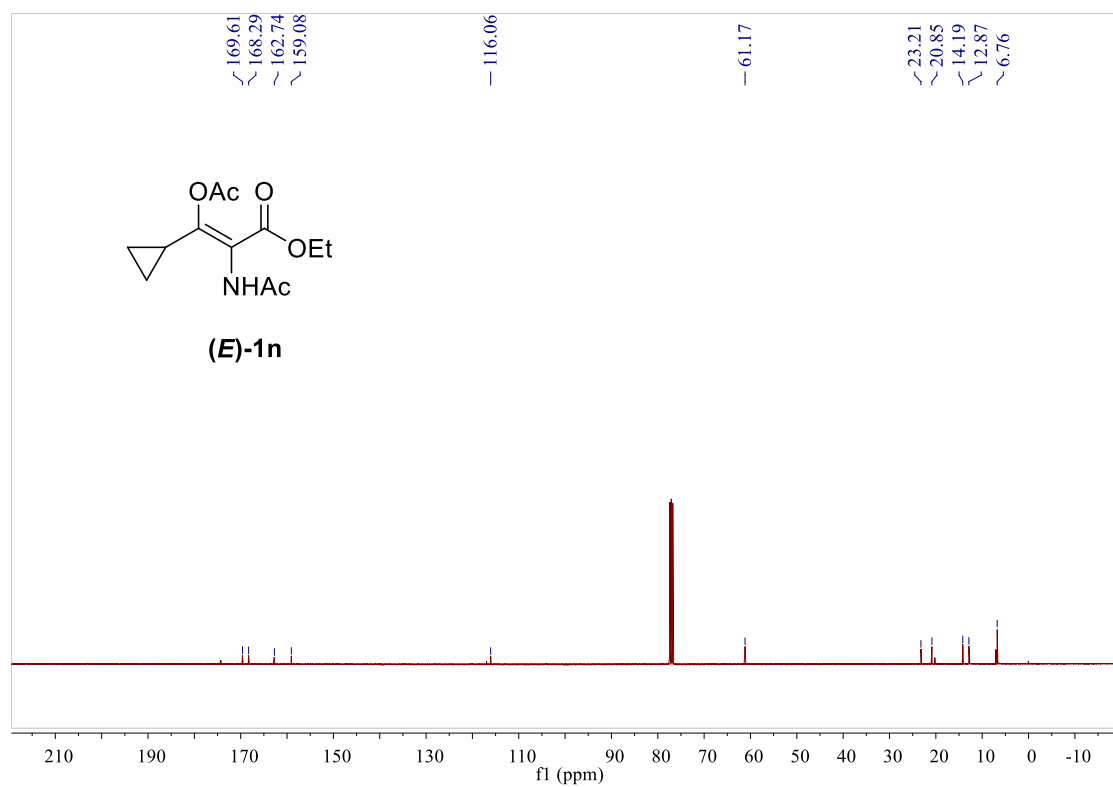



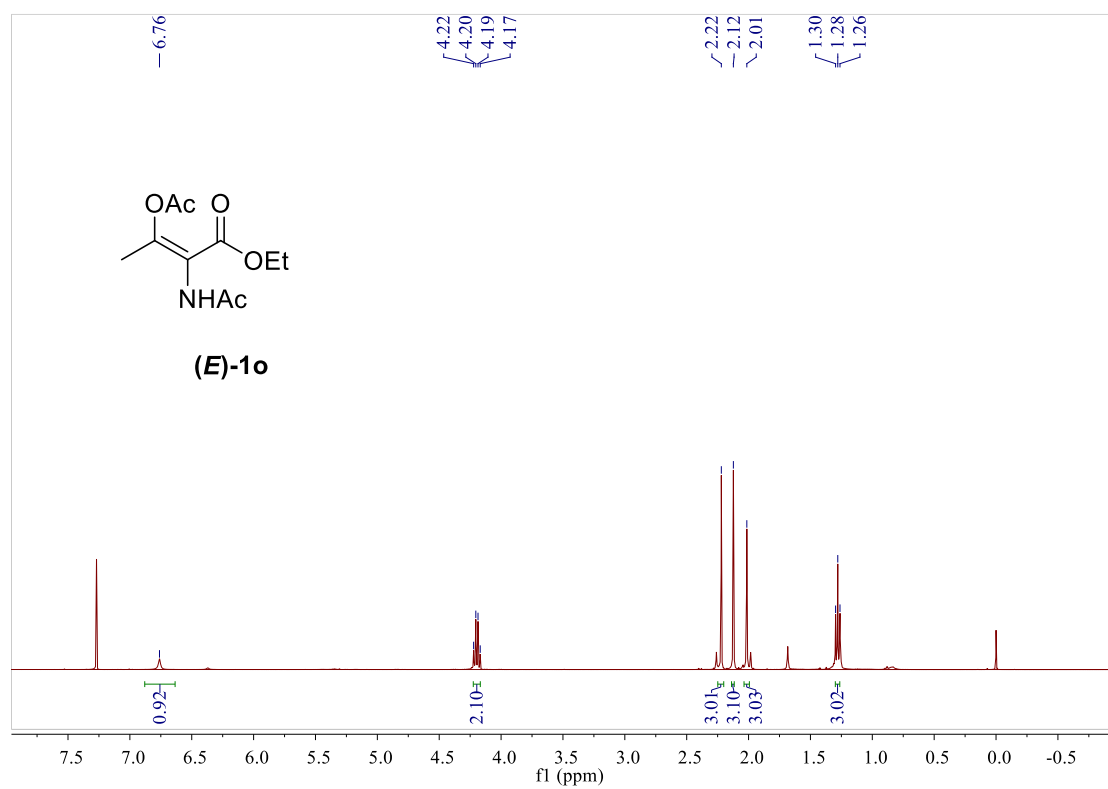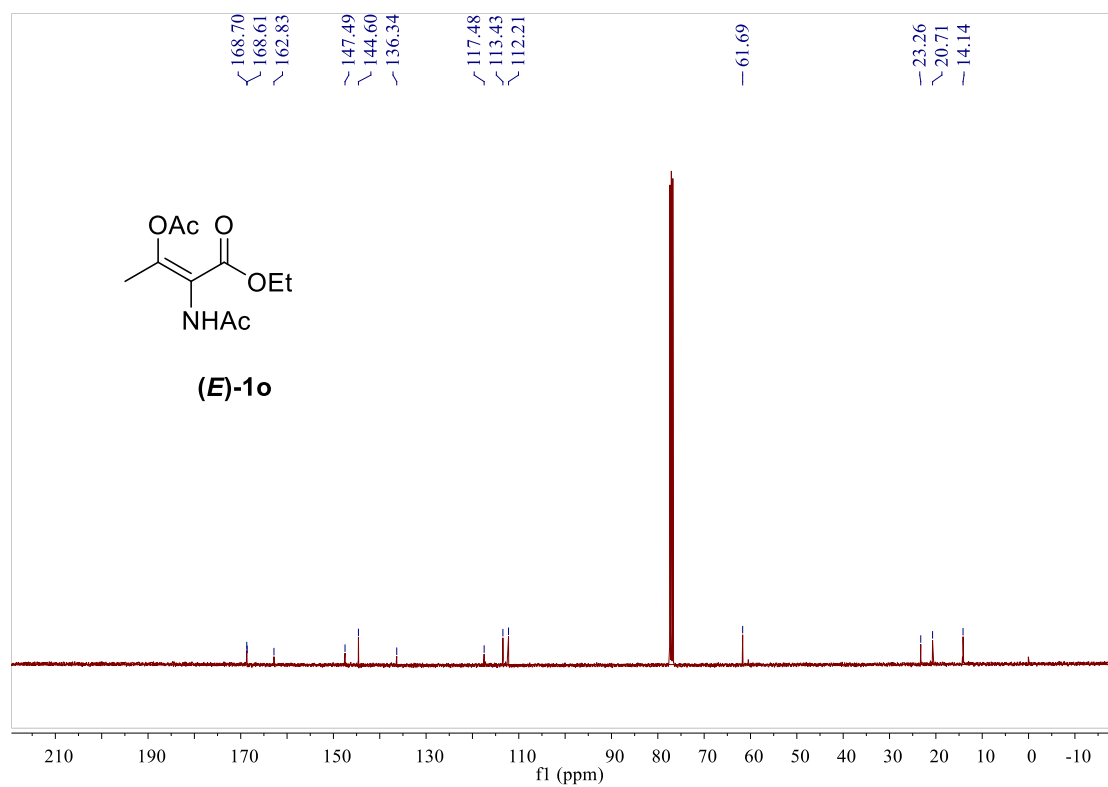

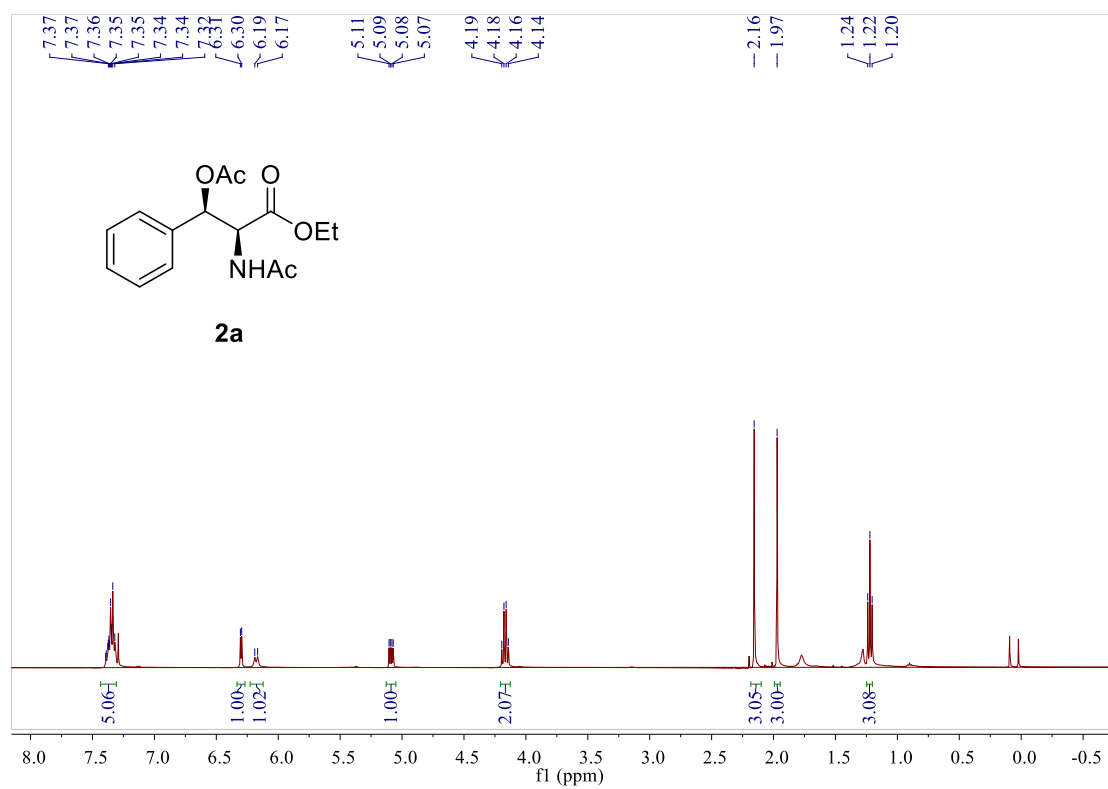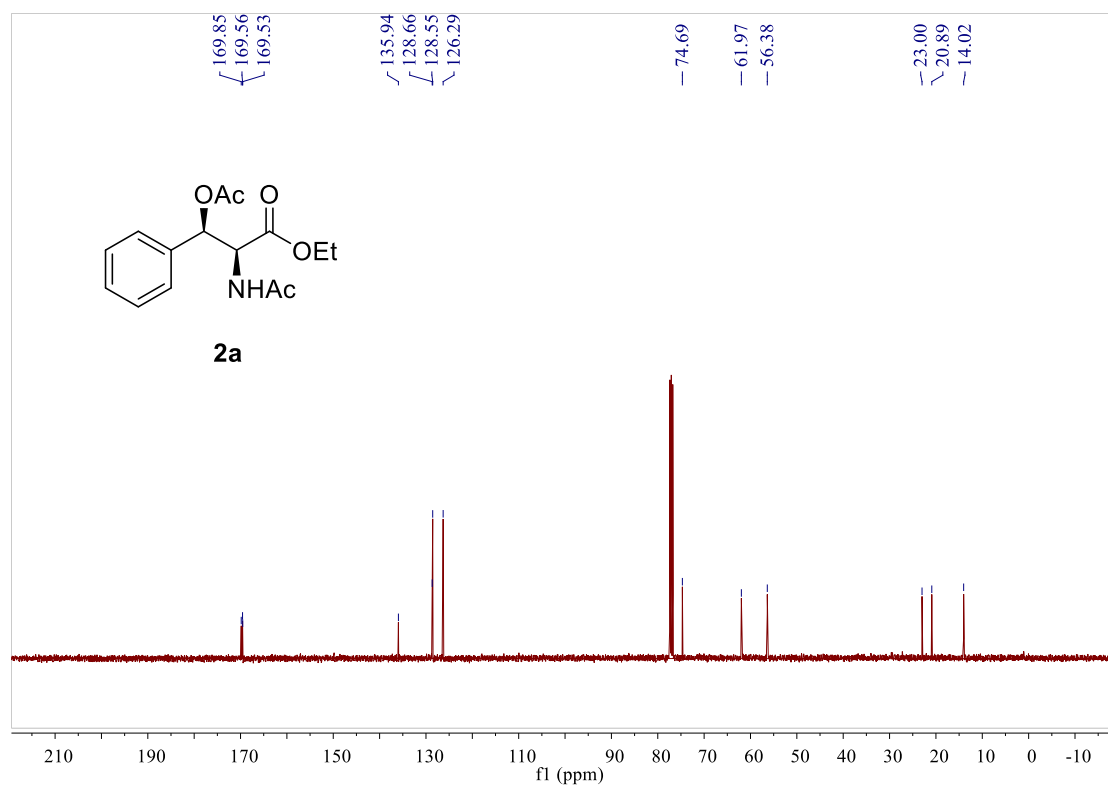

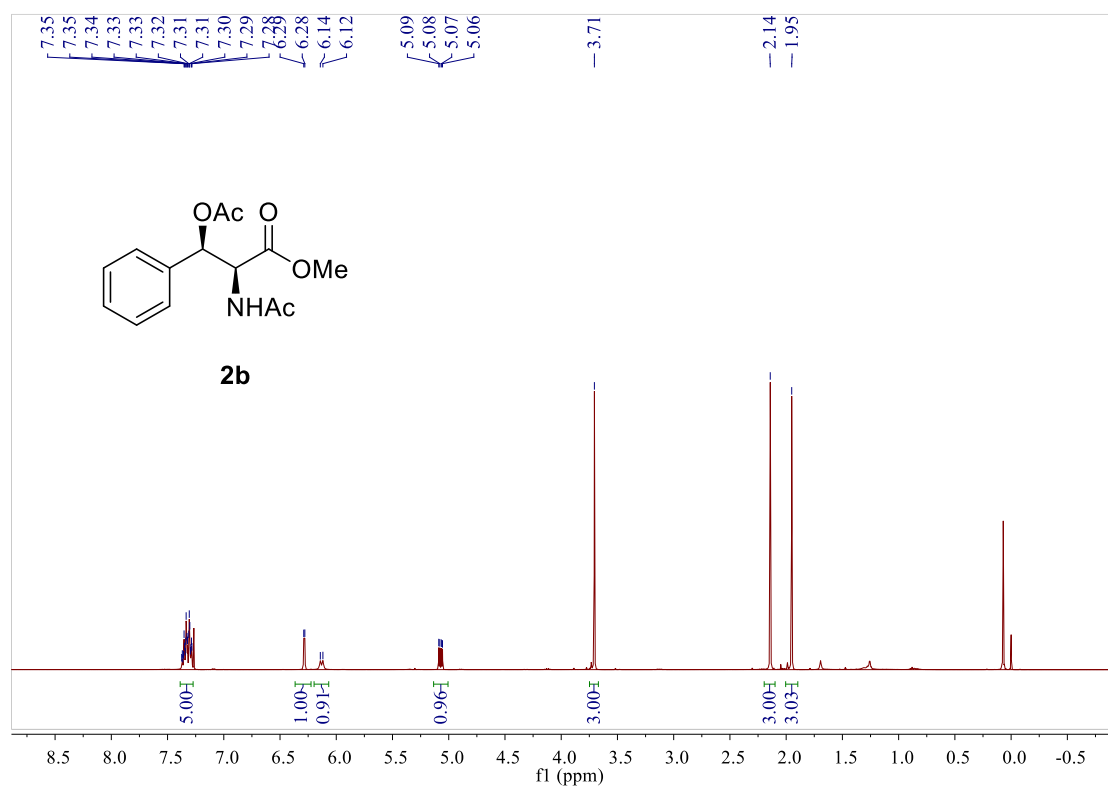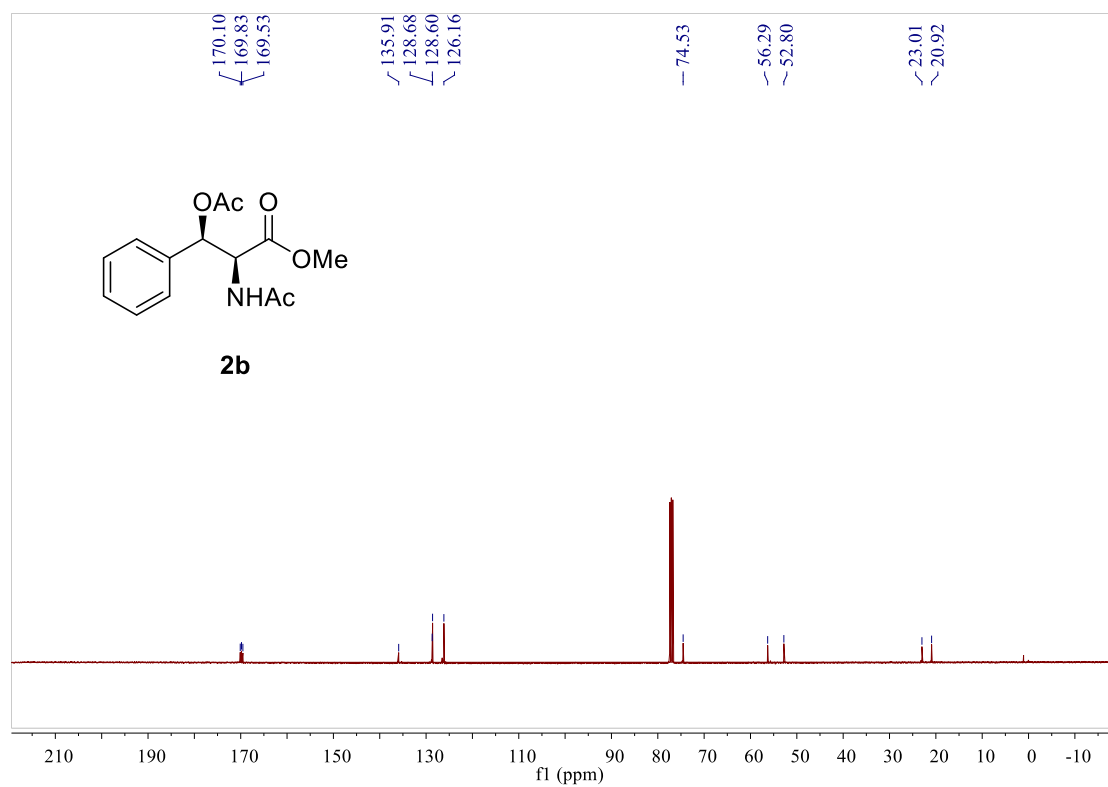

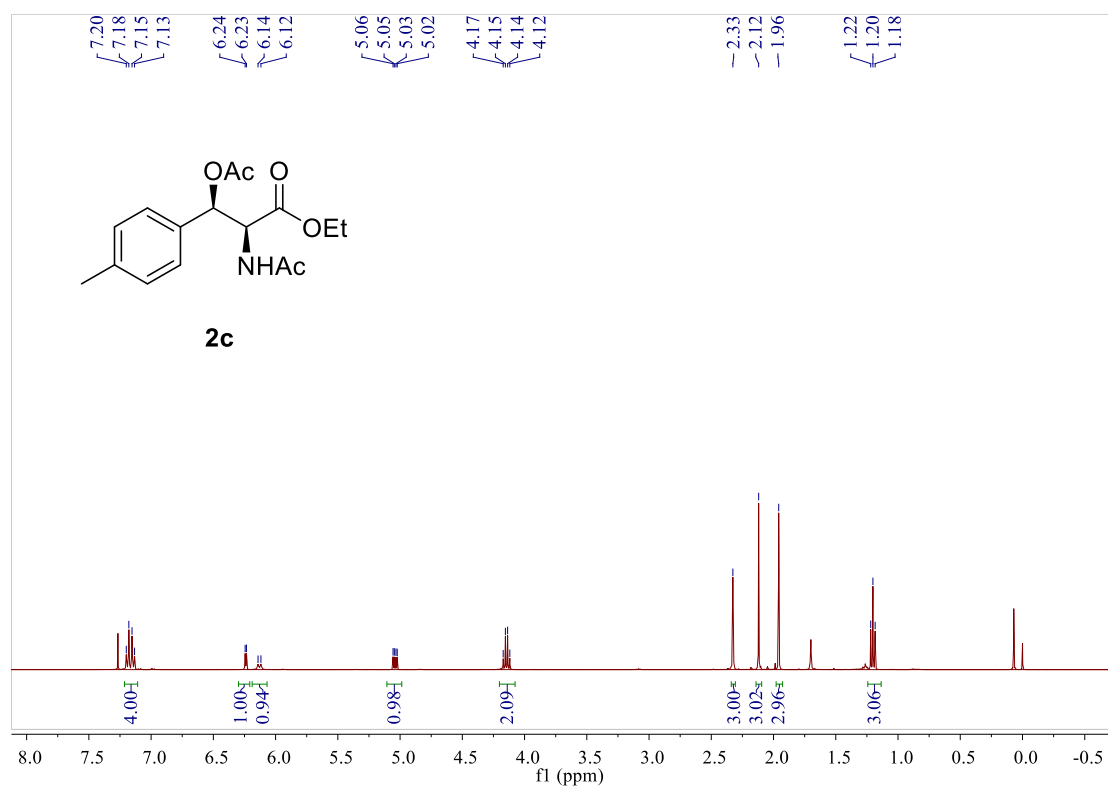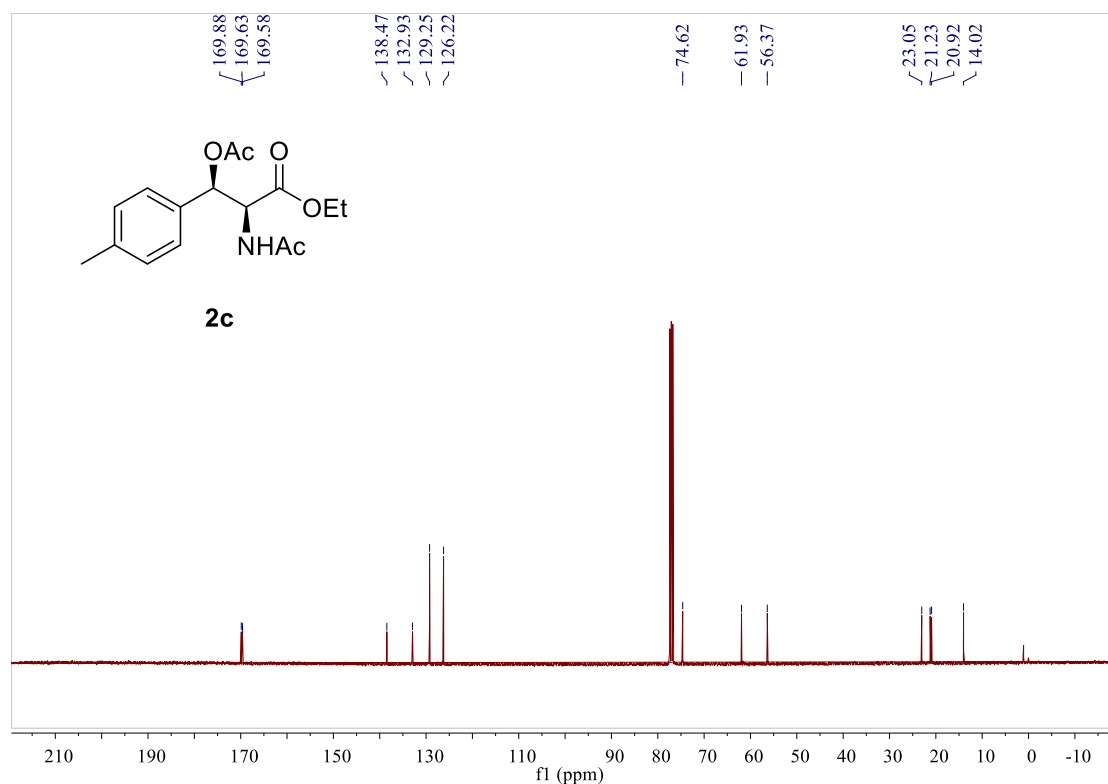

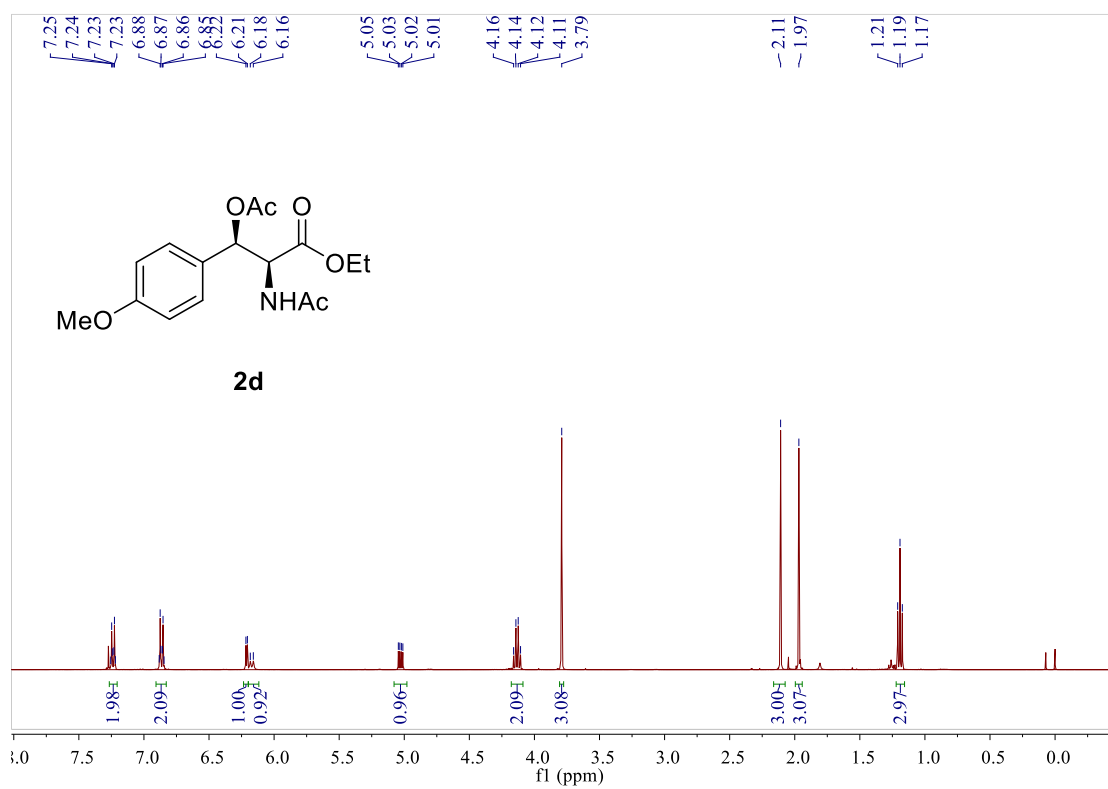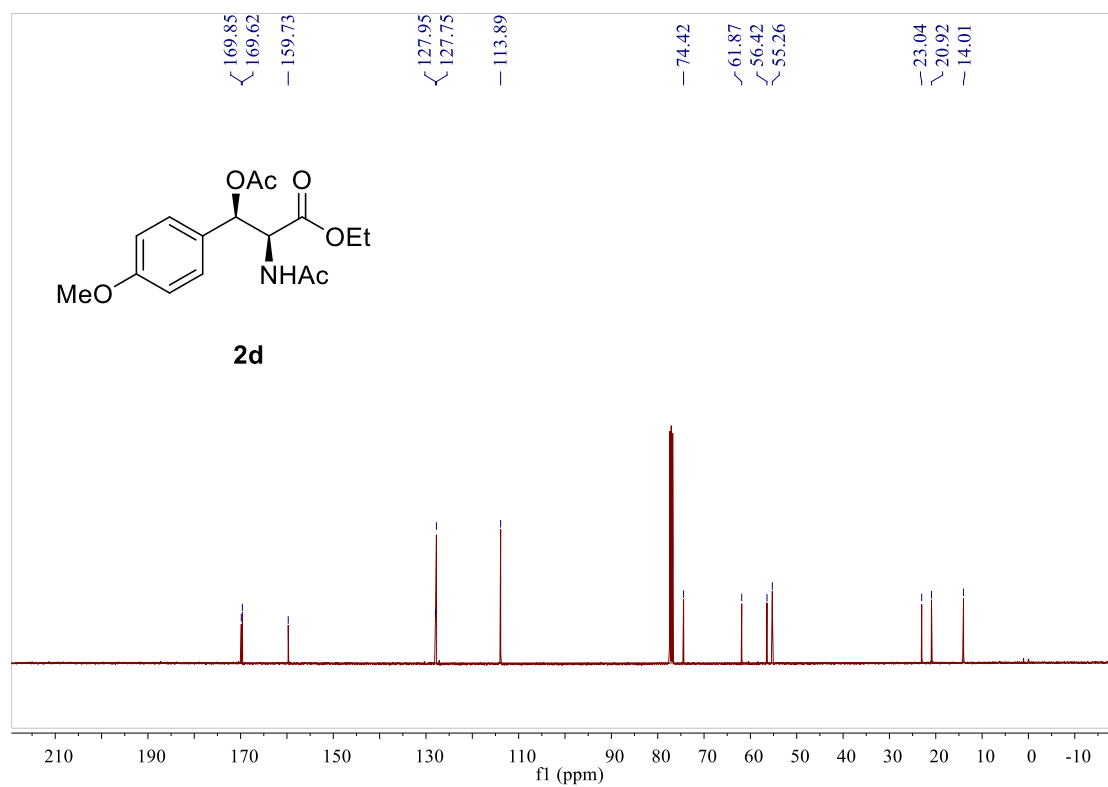

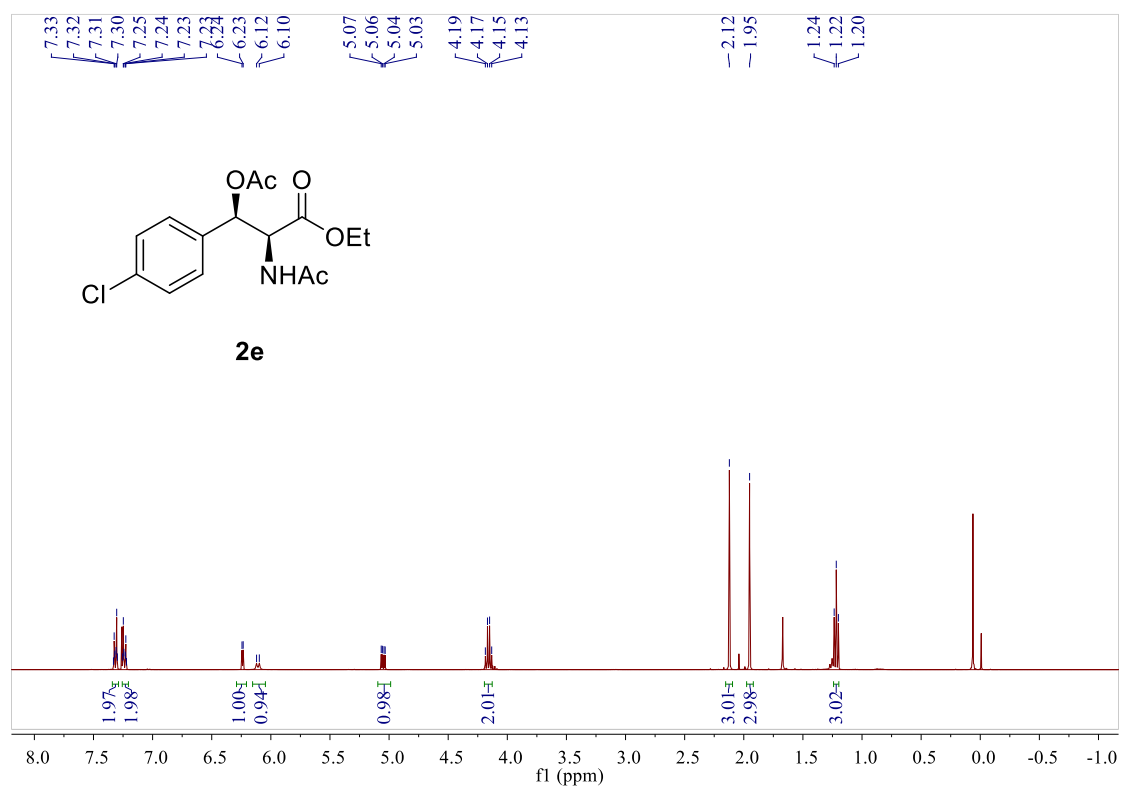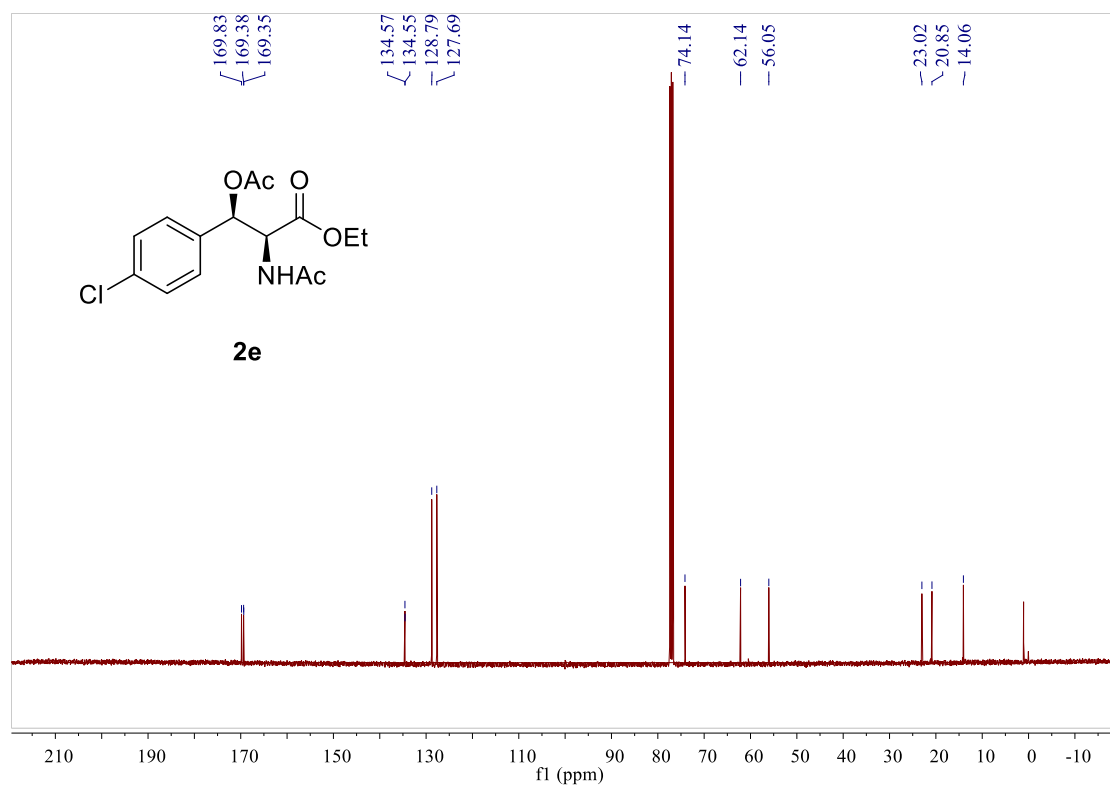

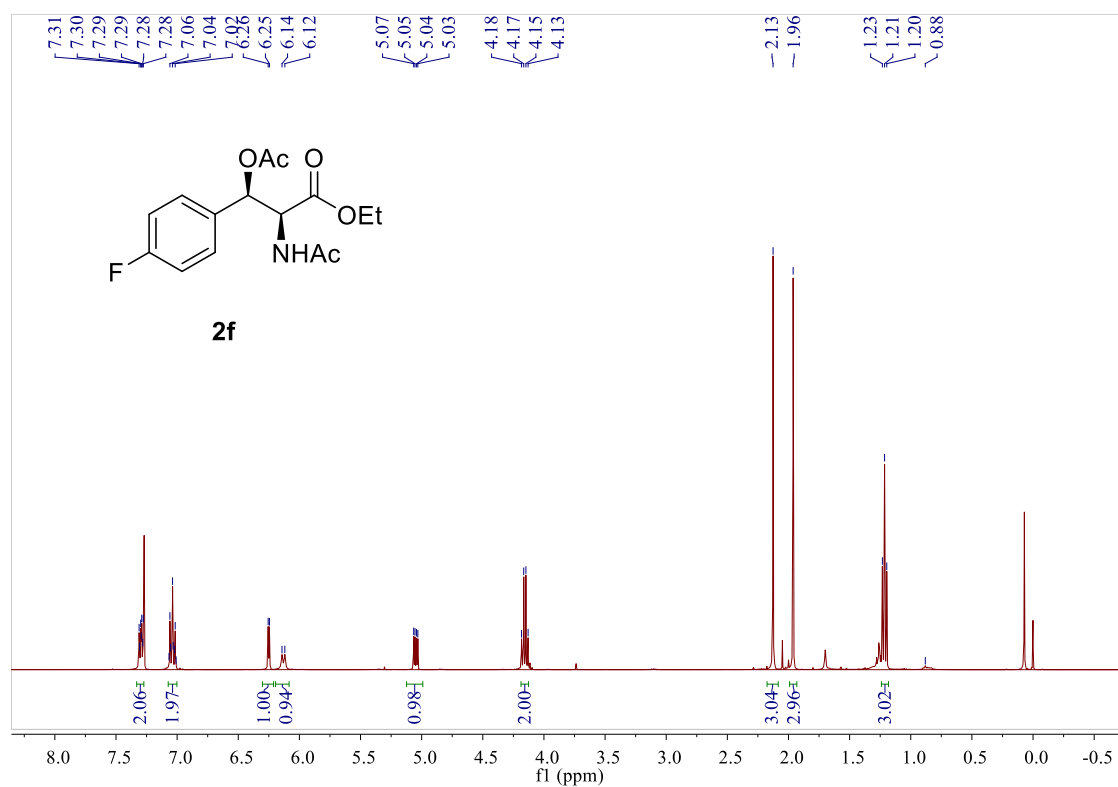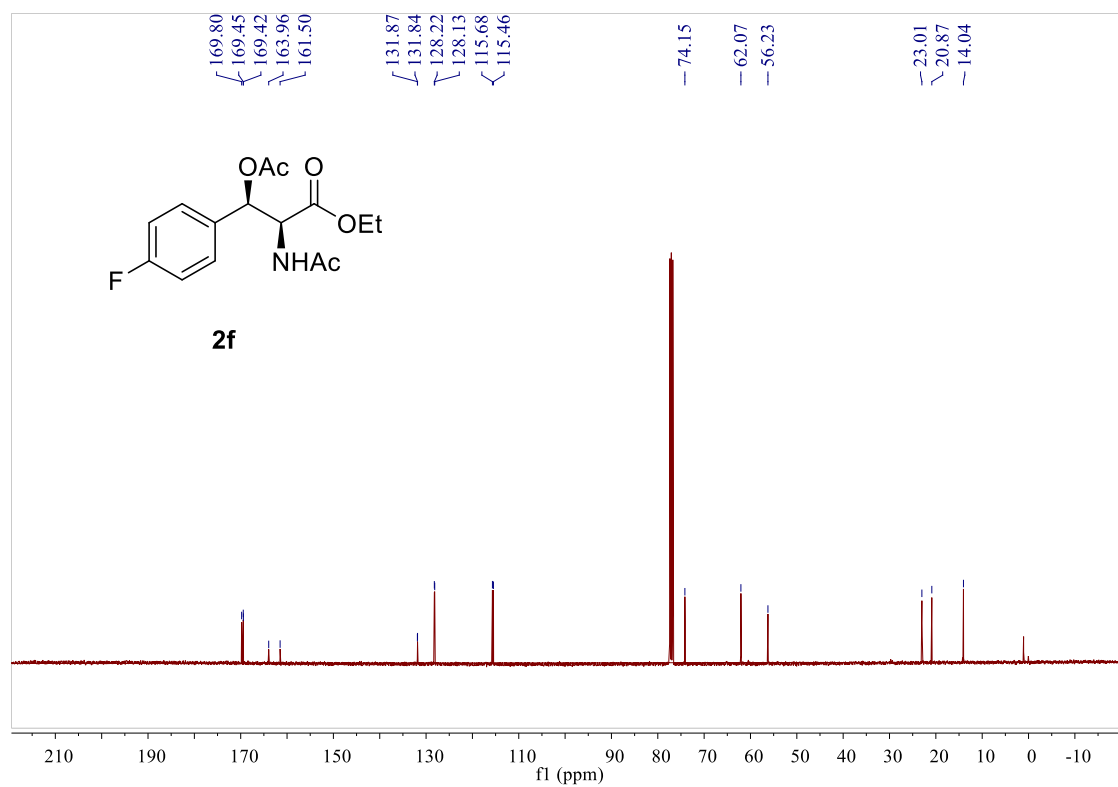

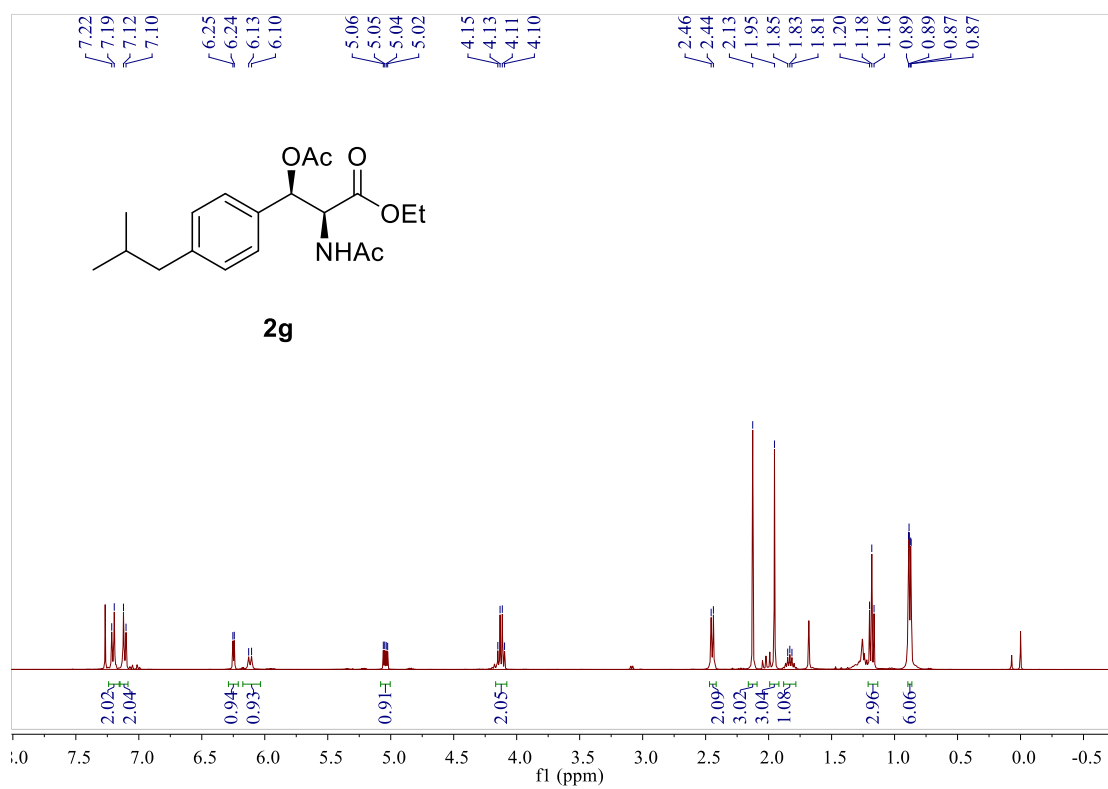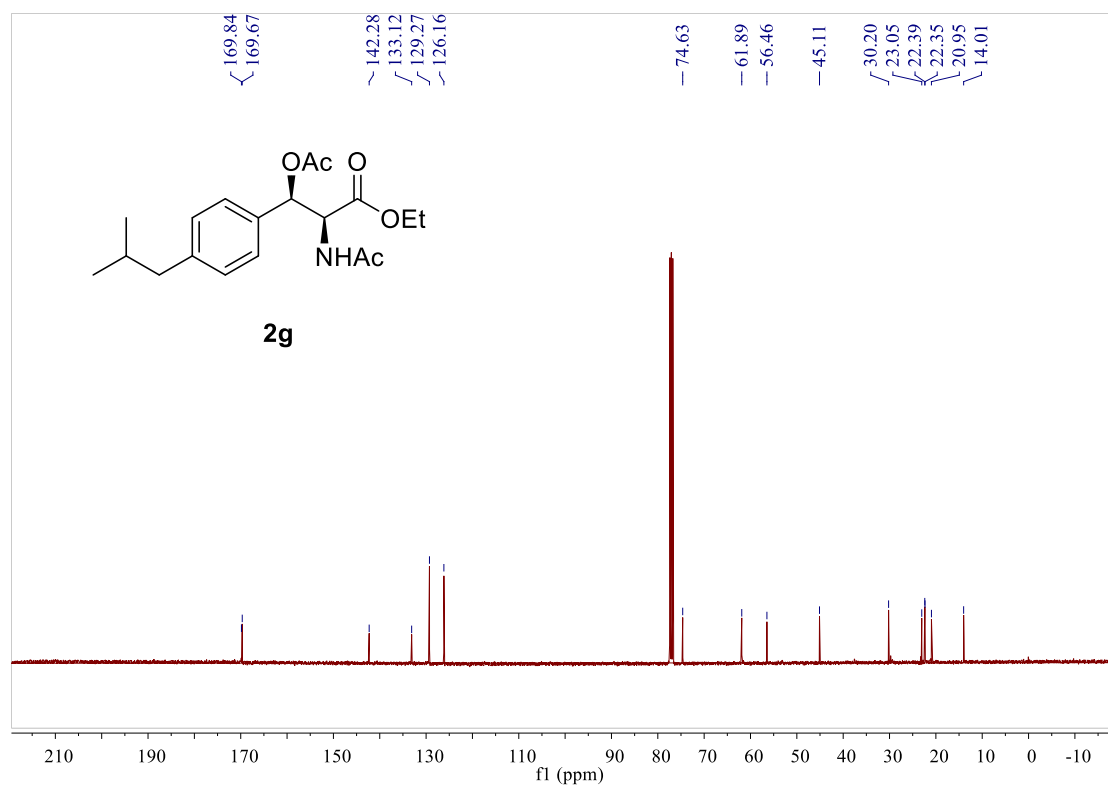



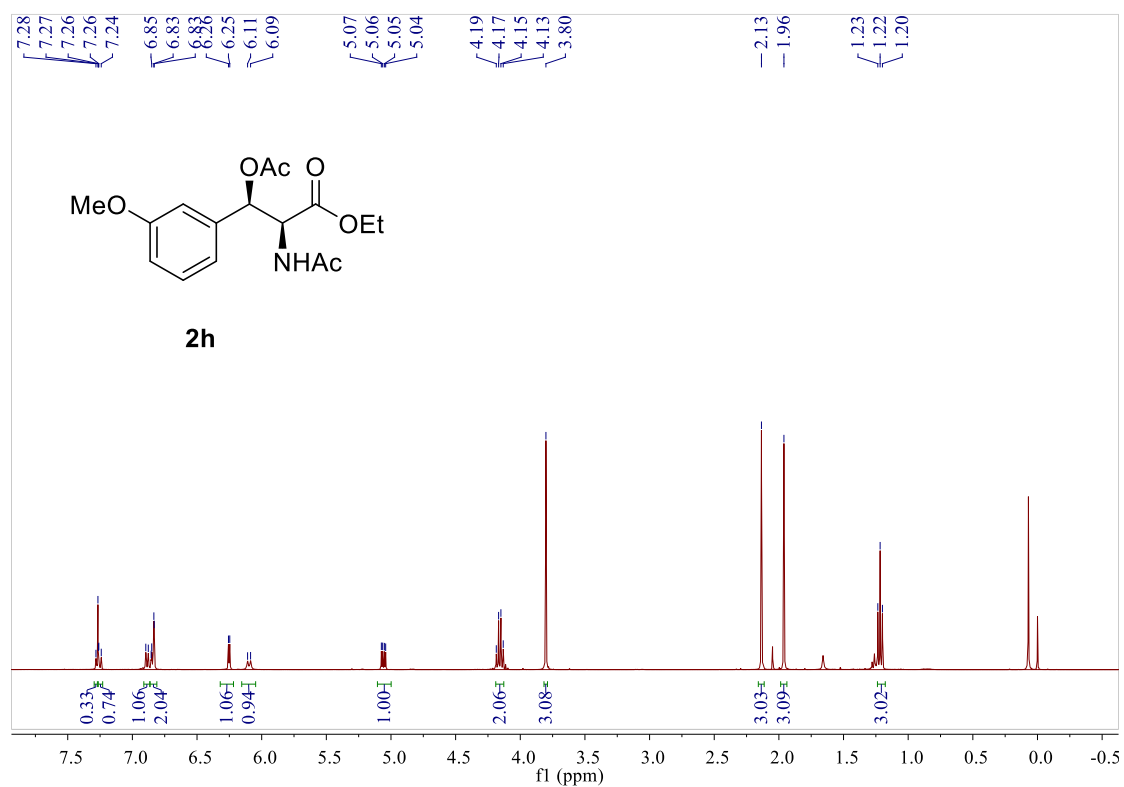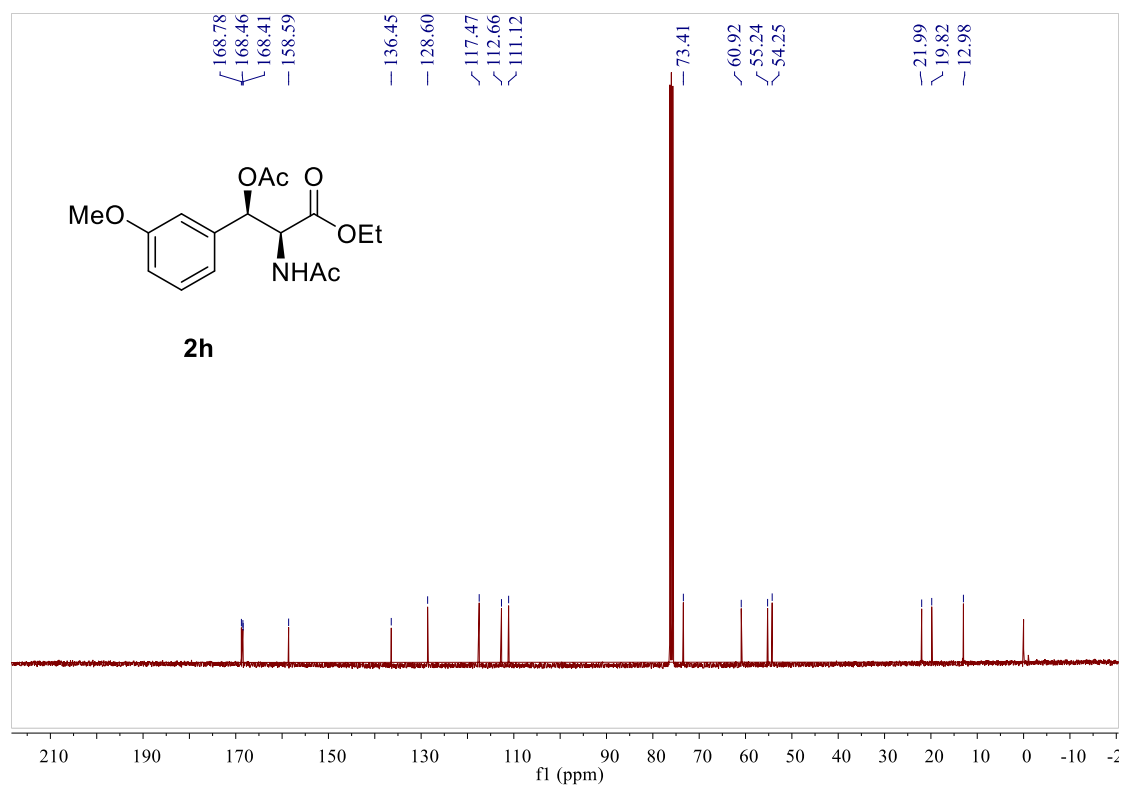

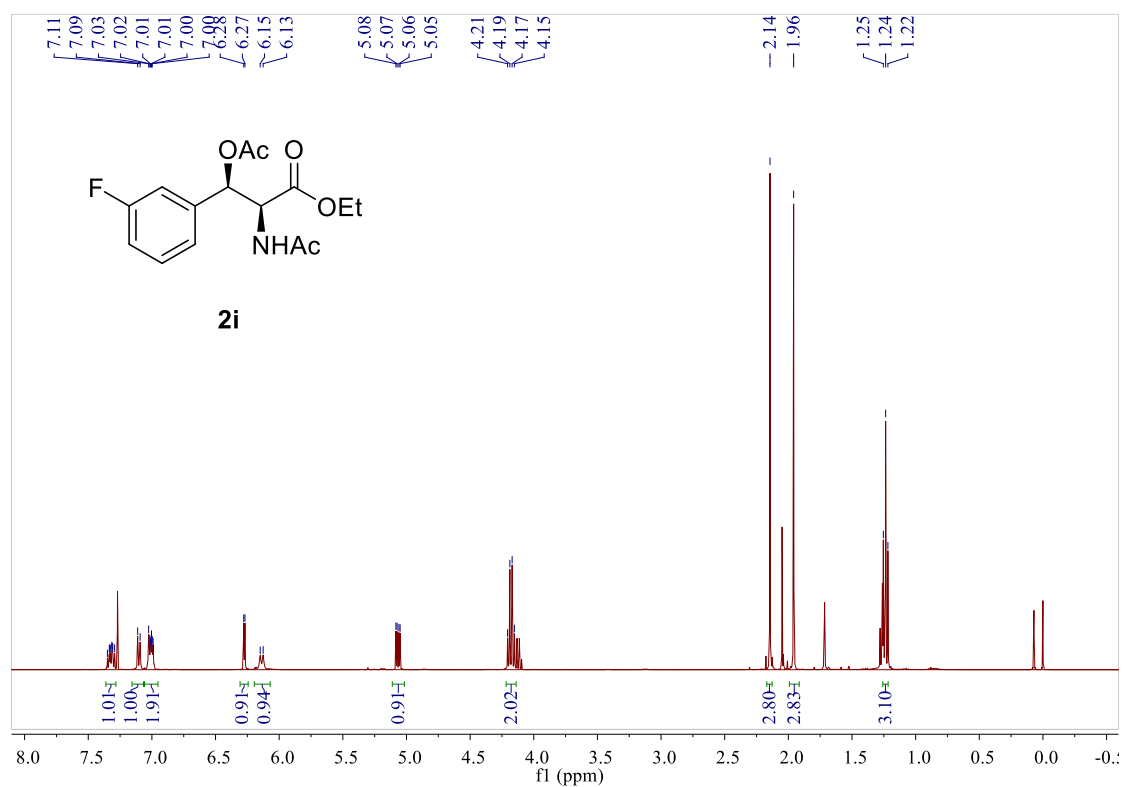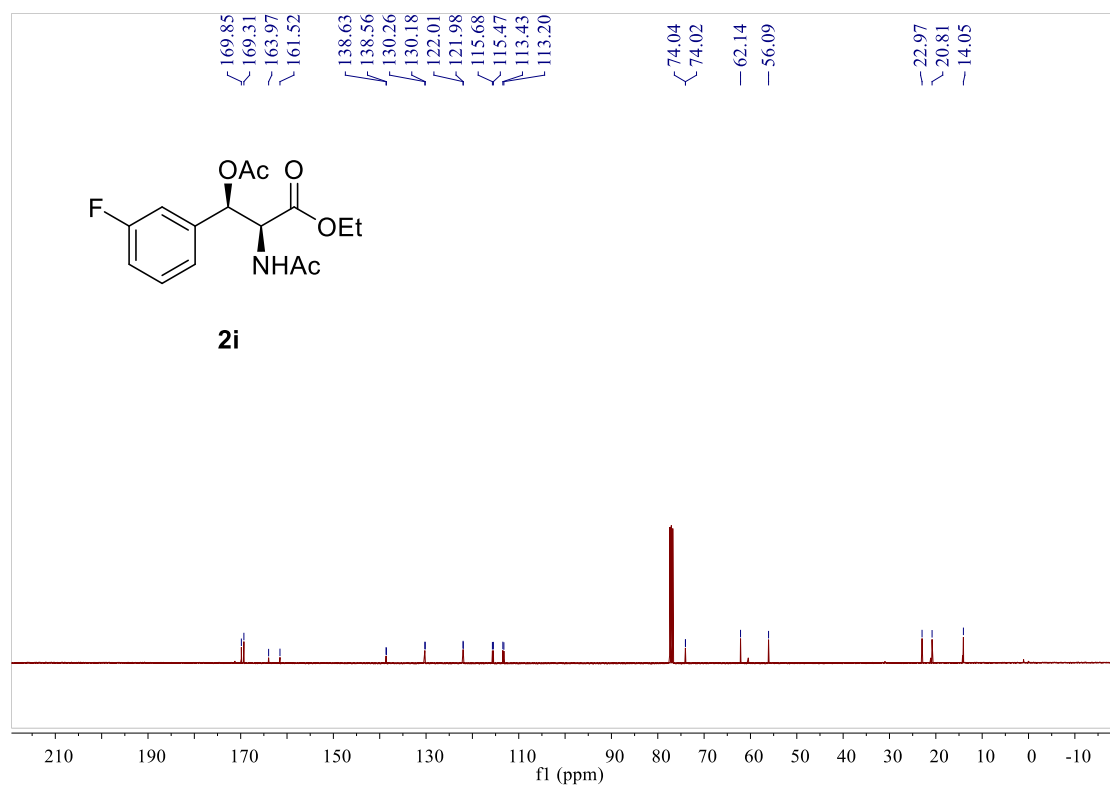

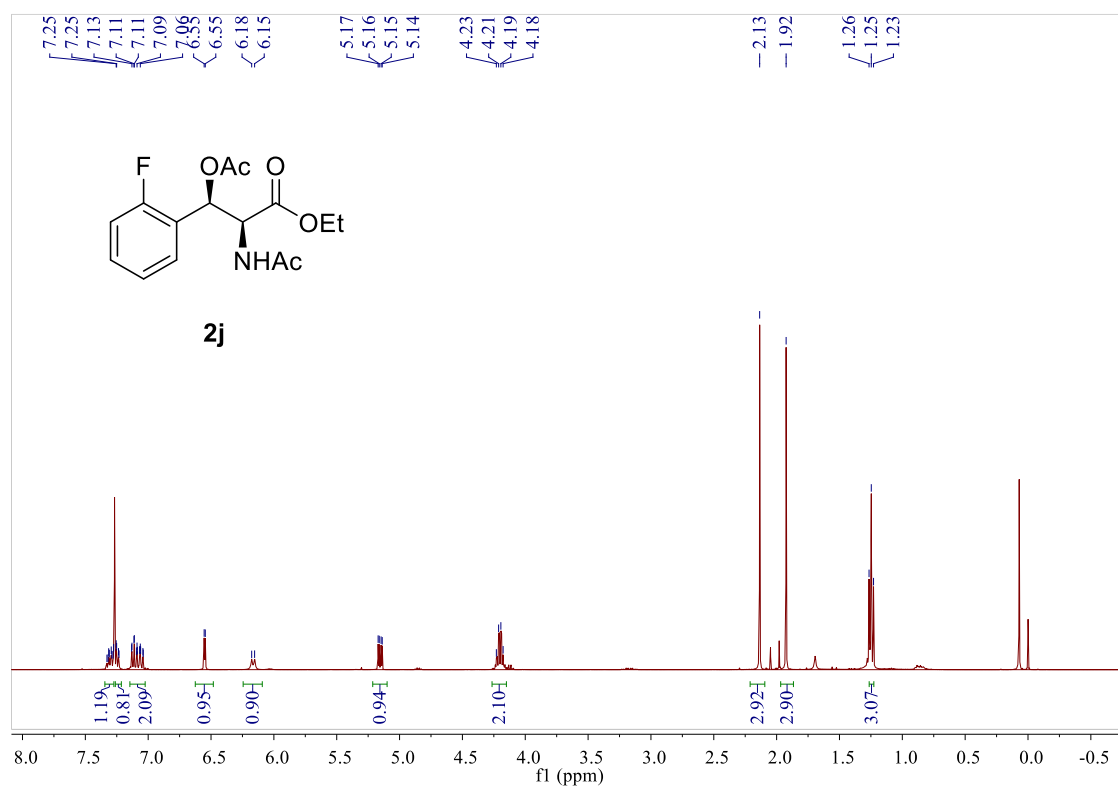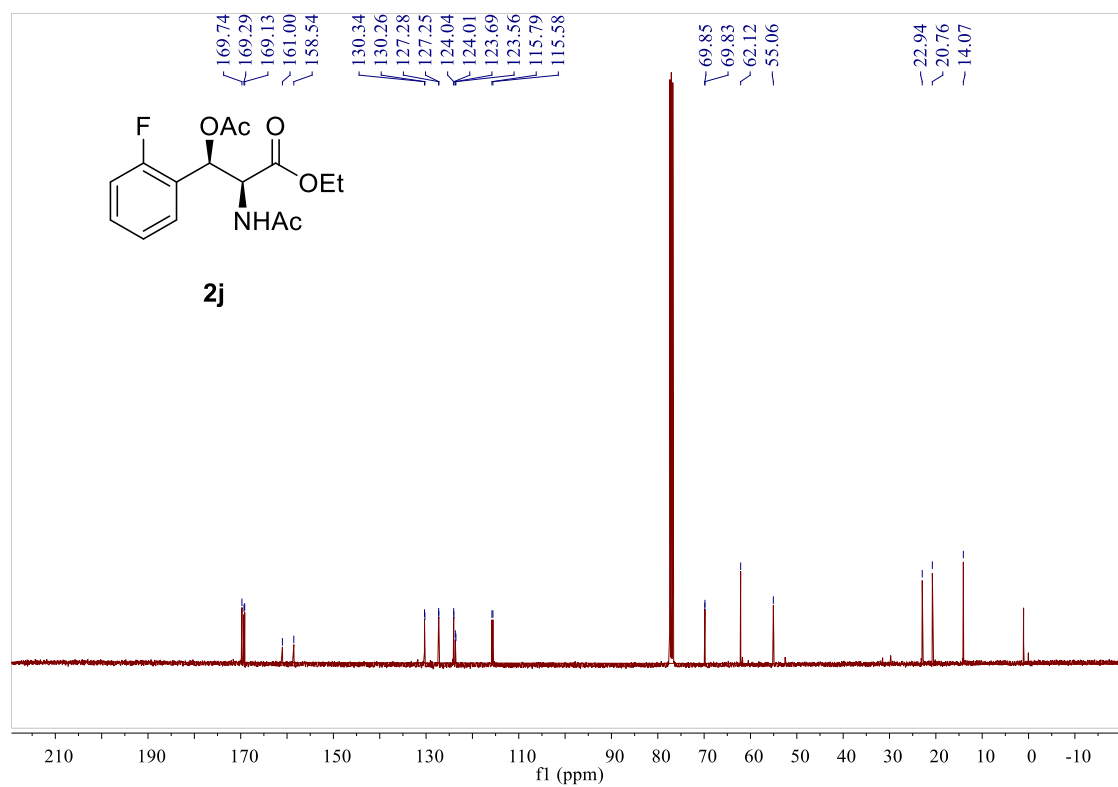

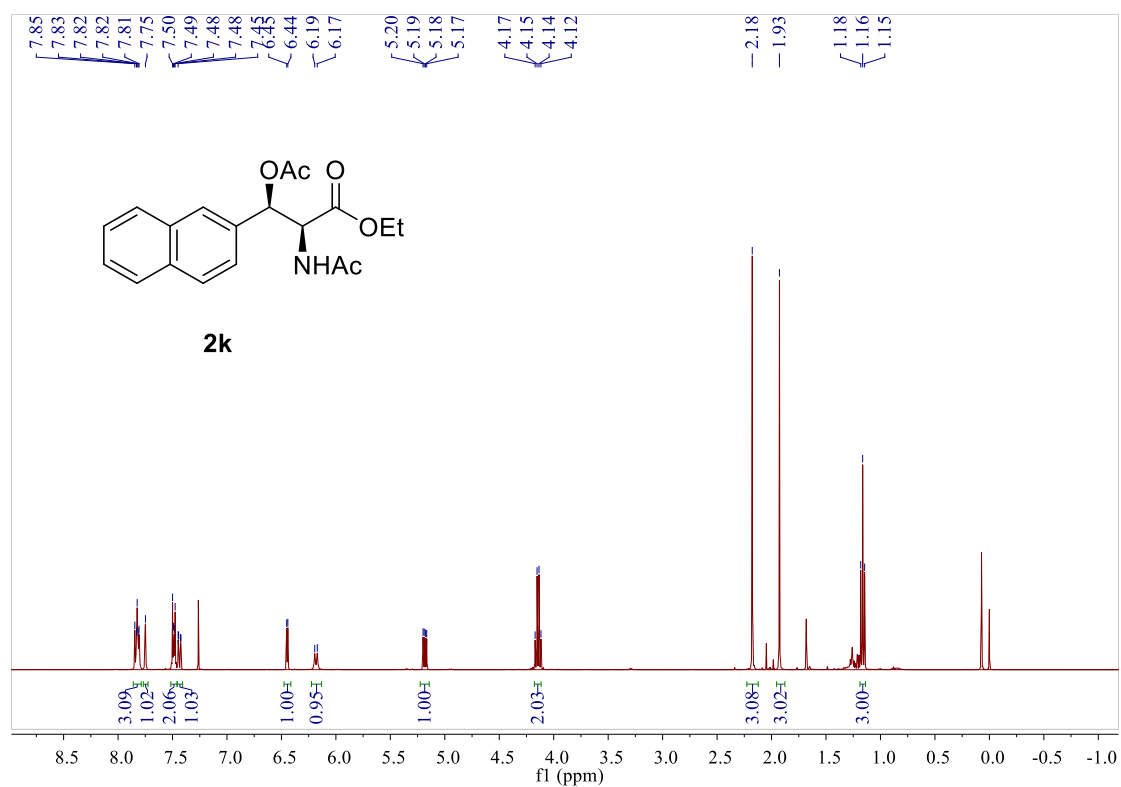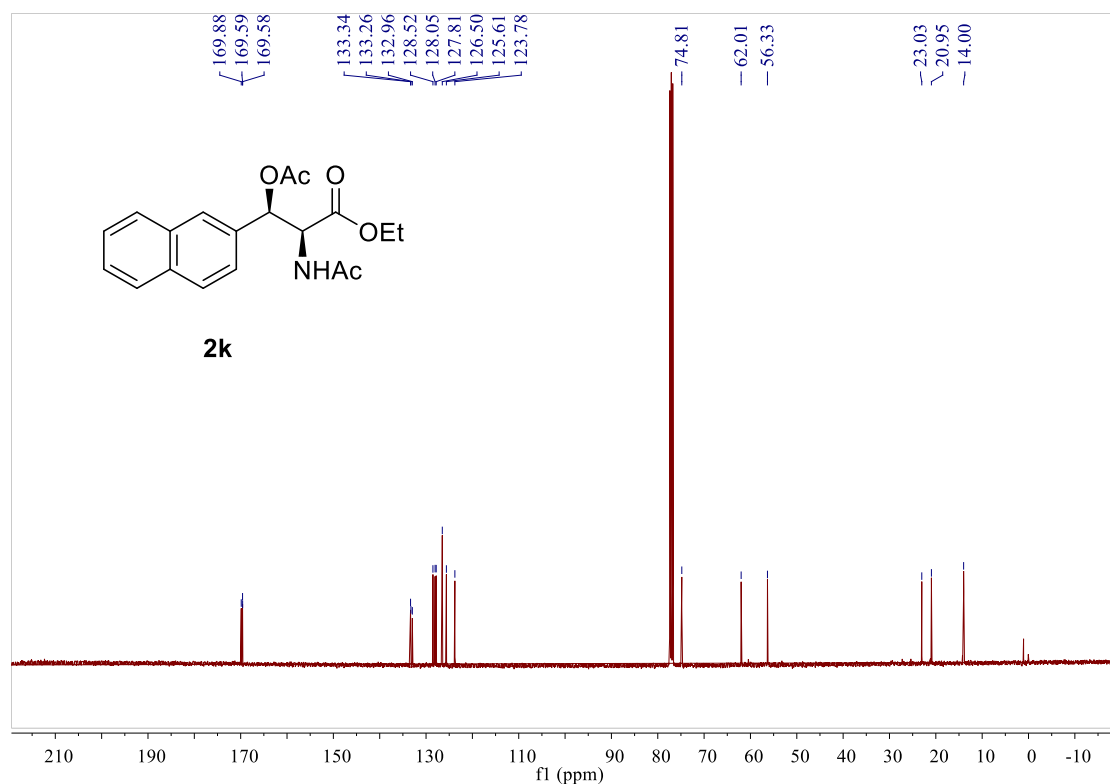

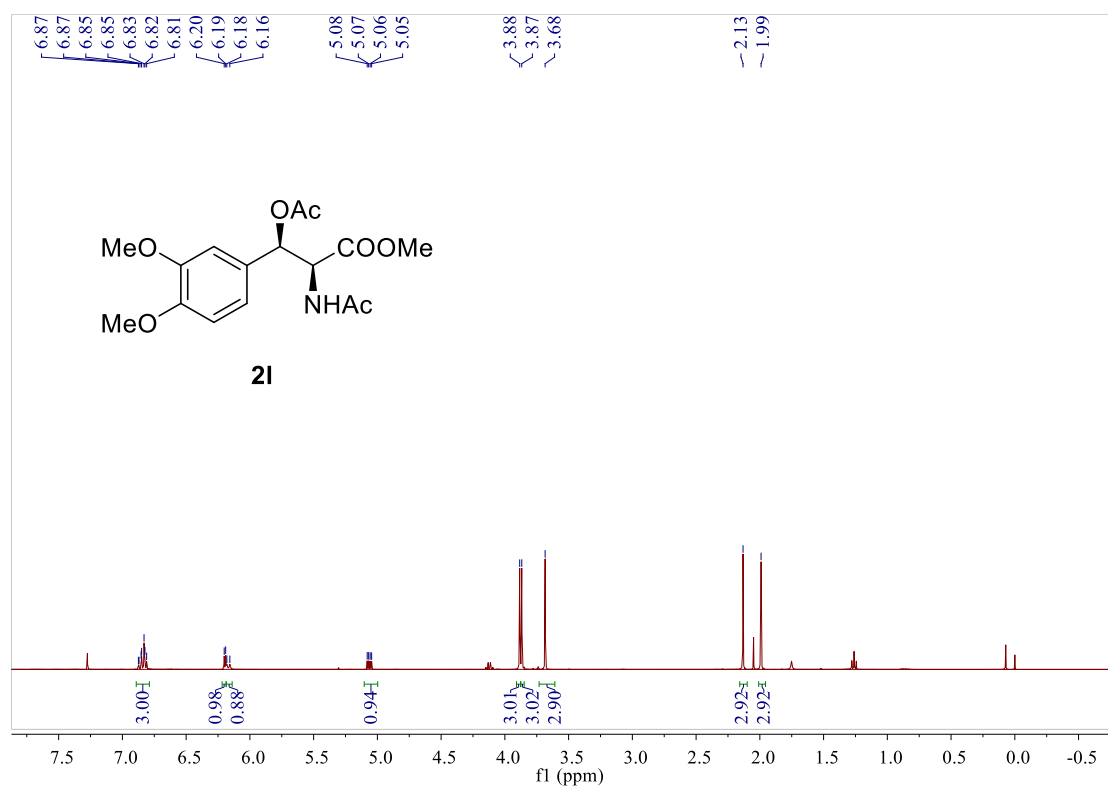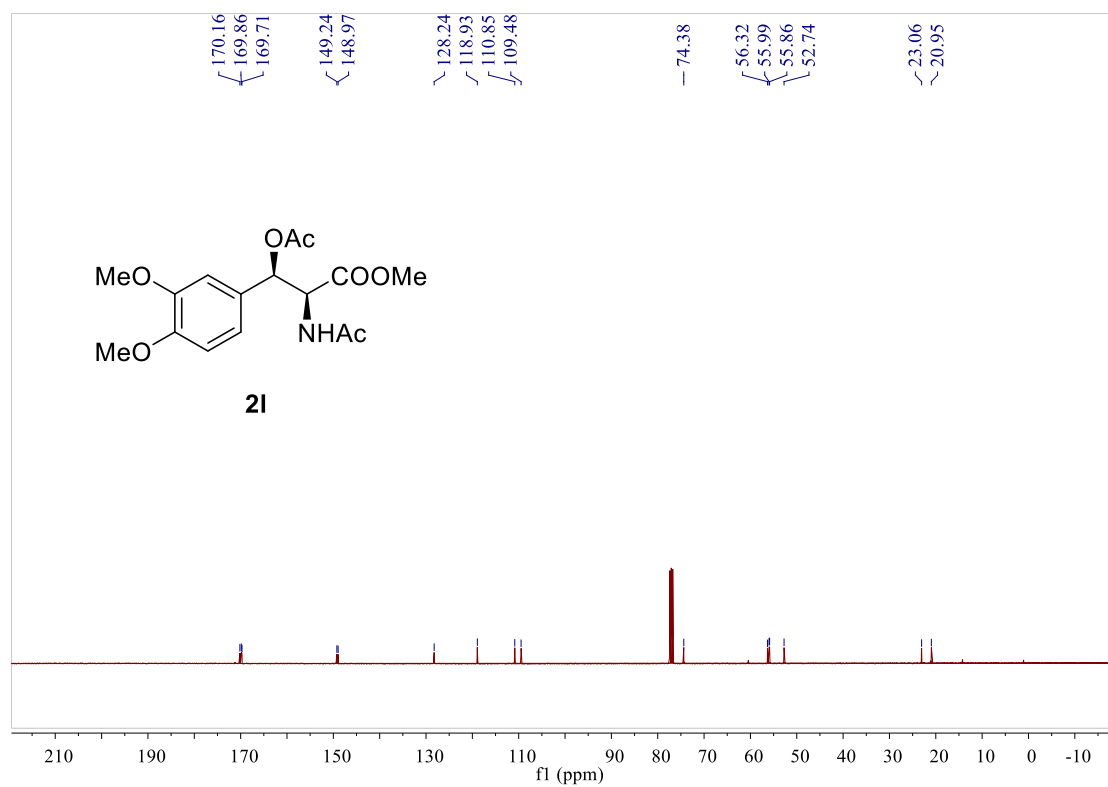

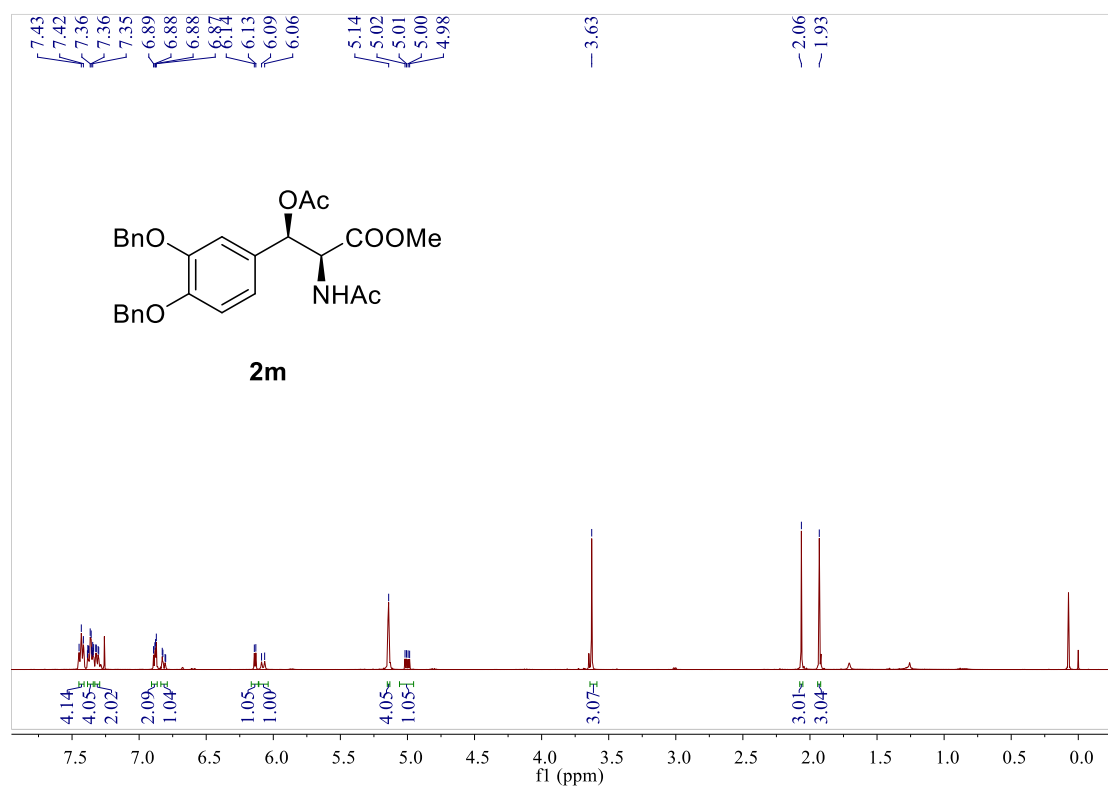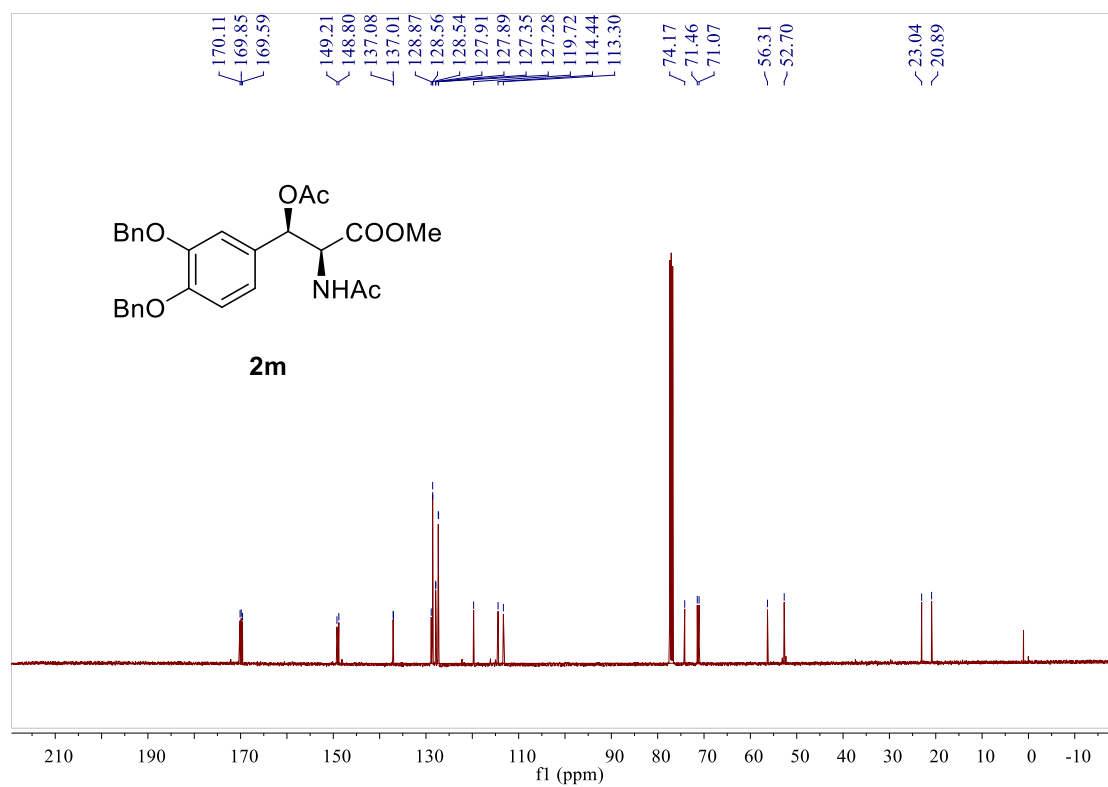

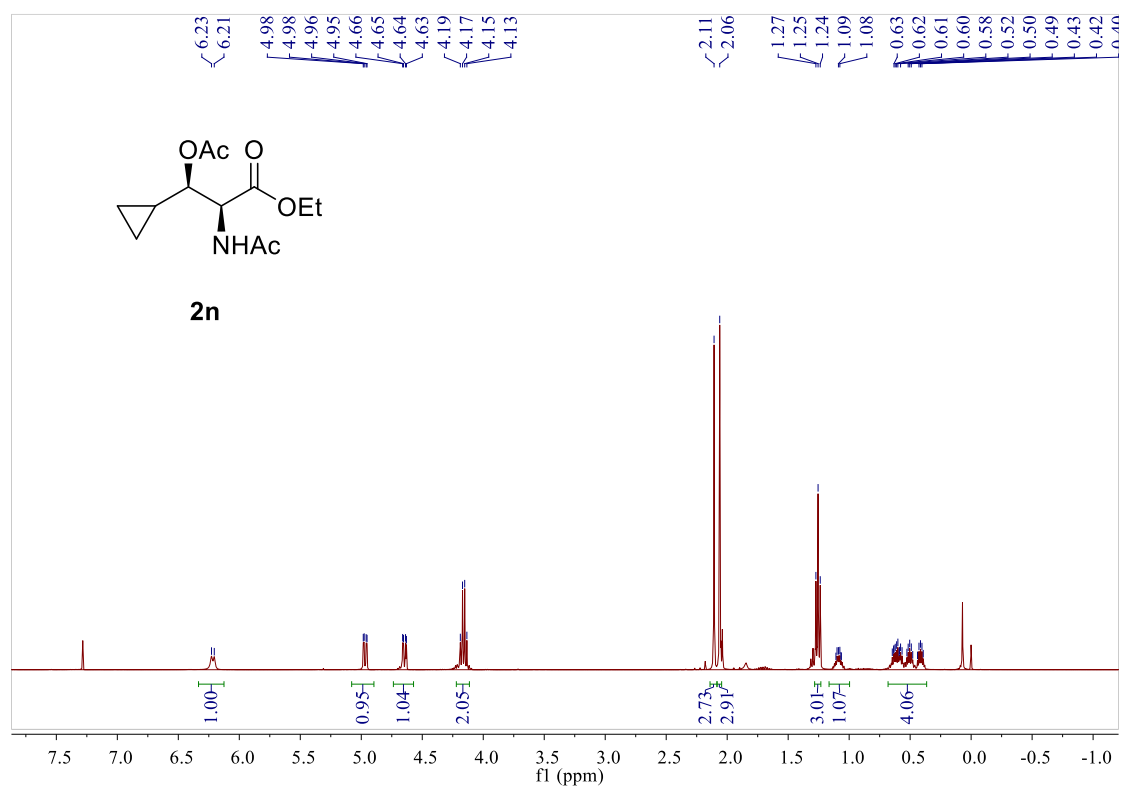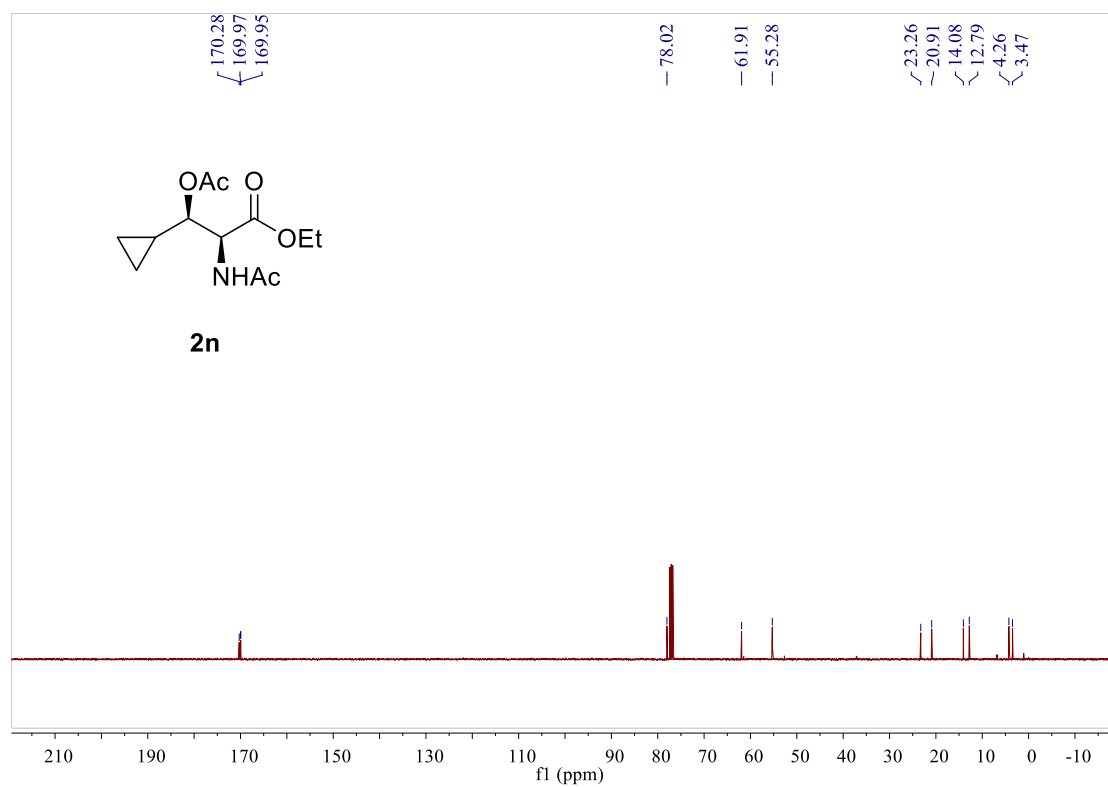

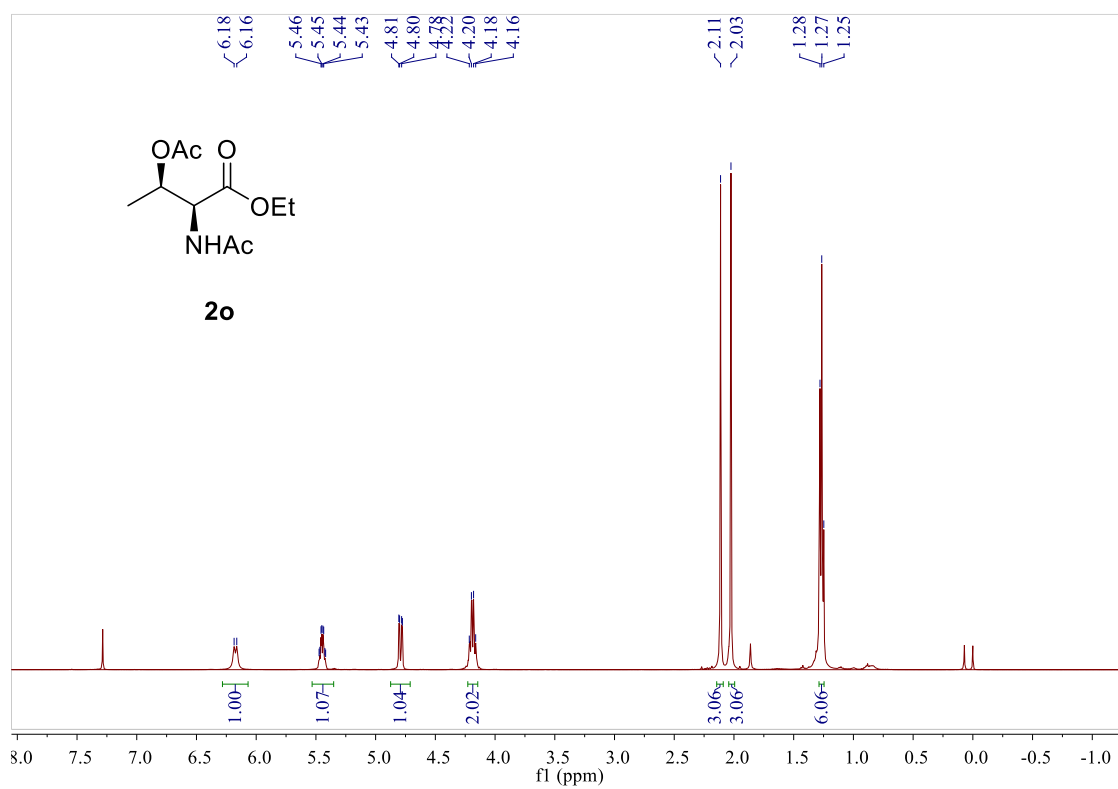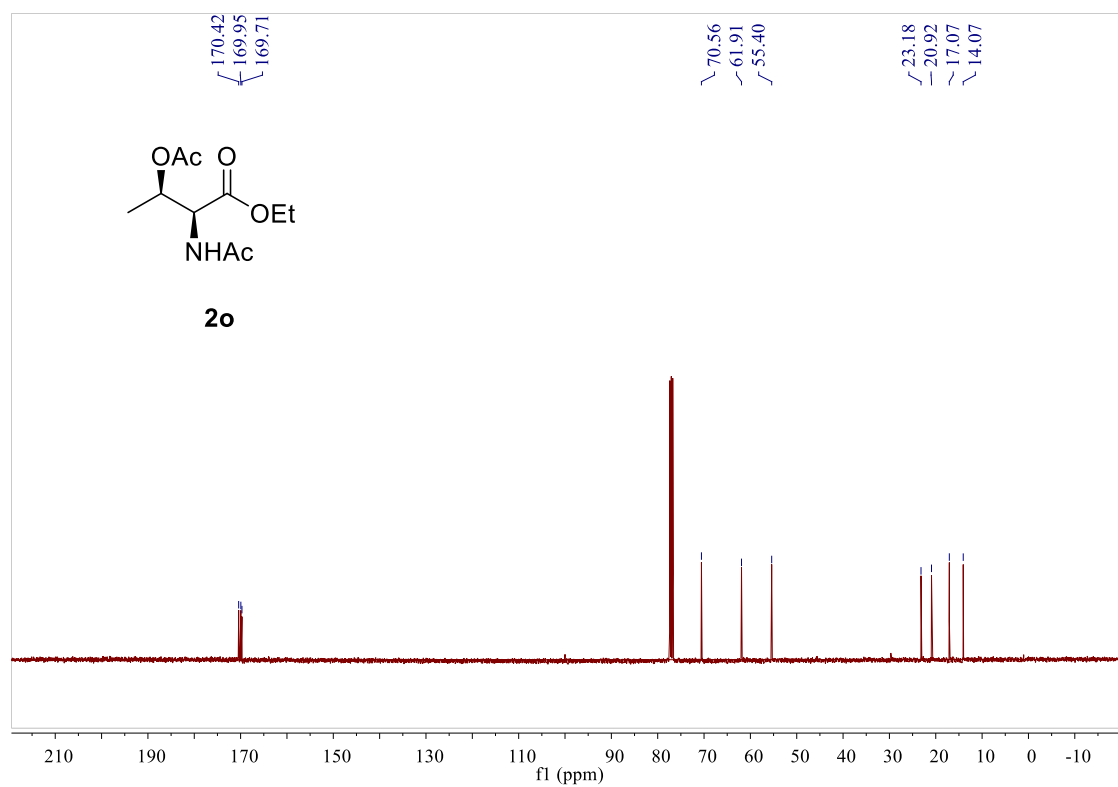



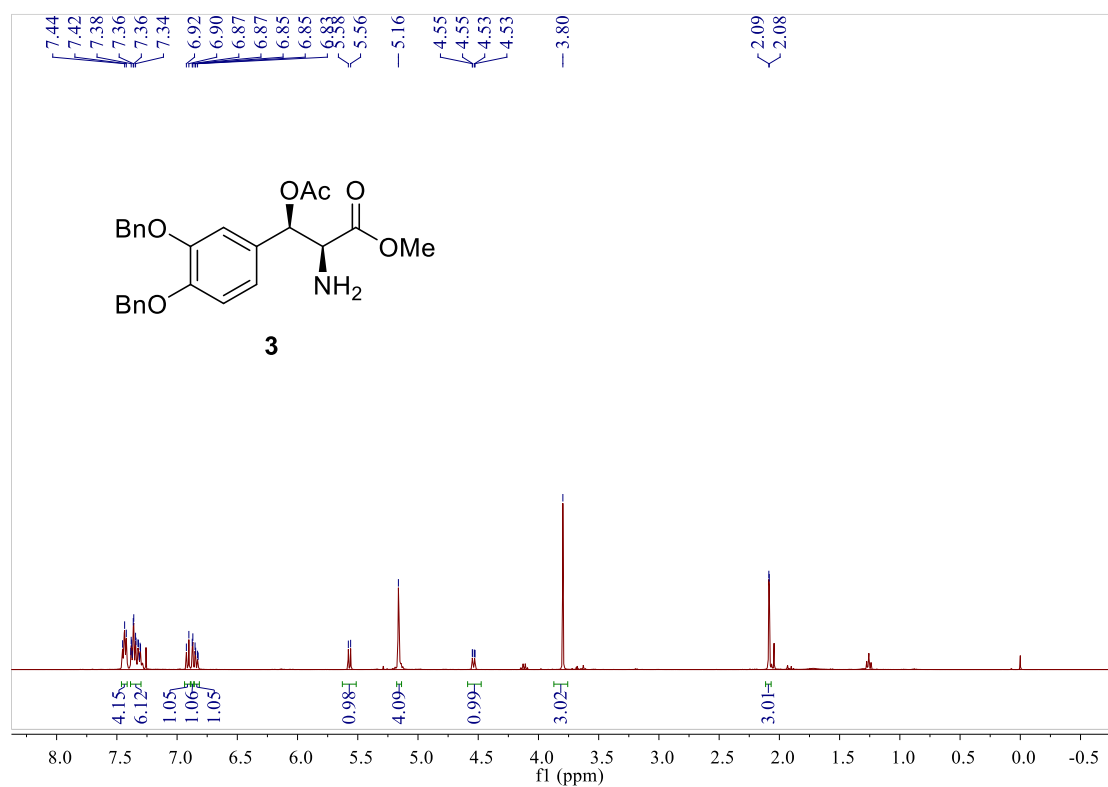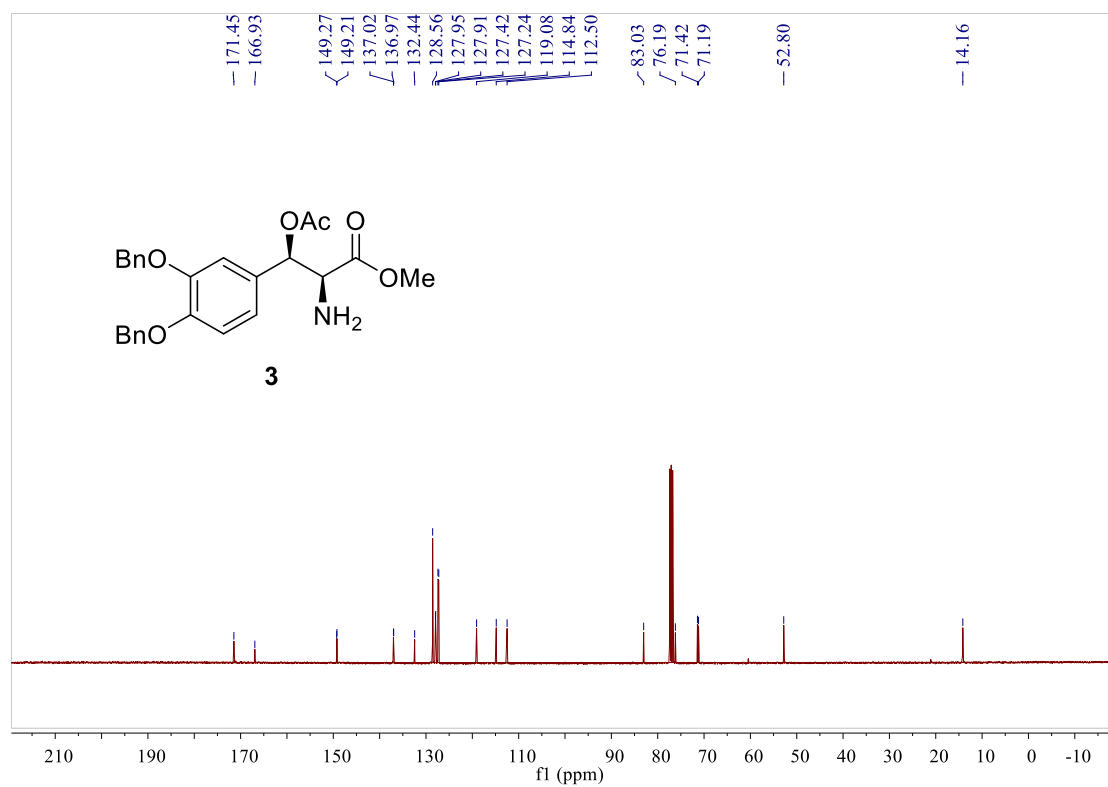

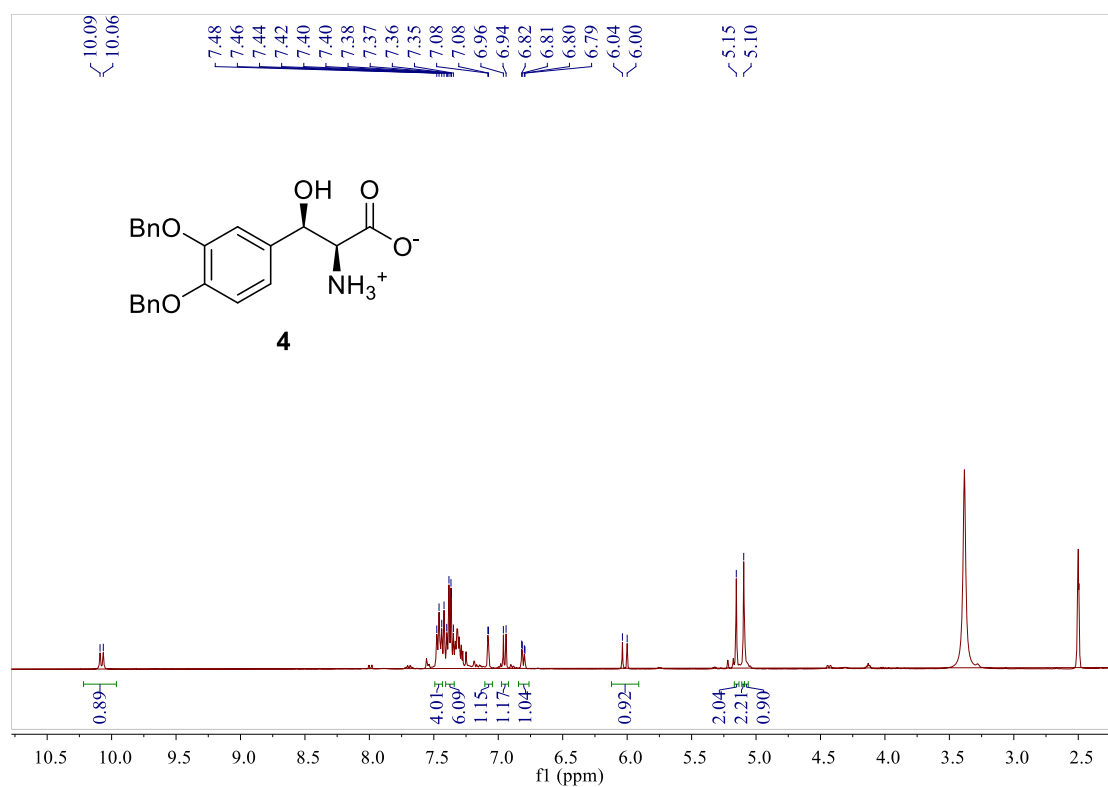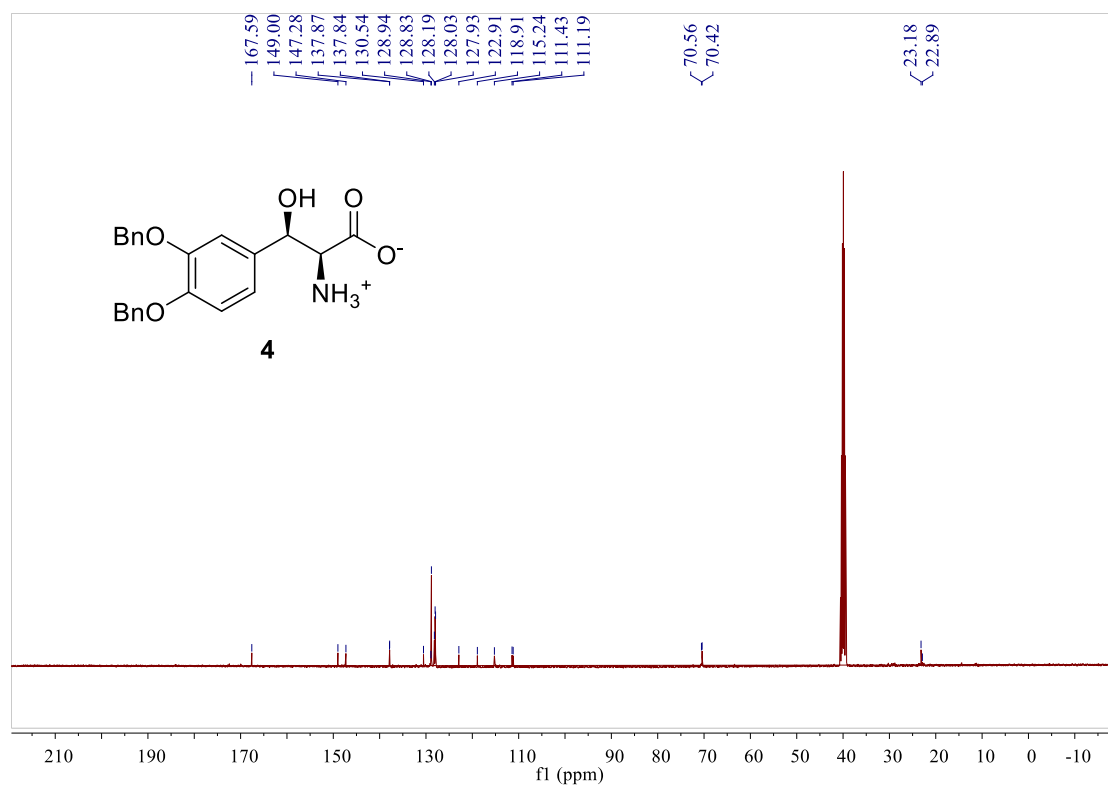

Data File E:\DATA\GYQ\GYQ-GM\GYQ-20160730 2016-07-30 08-36-13\082-0401.D  
Sample Name: Ph-rac

=====

|                 |                                                                                                                    |            |            |
|-----------------|--------------------------------------------------------------------------------------------------------------------|------------|------------|
| Acq. Operator   | : SYSTEM                                                                                                           | Seq. Line  | : 4        |
| Acq. Instrument | : 1260HPLC-DAD                                                                                                     | Location   | : Vial 82  |
| Injection Date  | : 7/30/2016 9:59:02 AM                                                                                             | Inj        | : 1        |
|                 |                                                                                                                    | Inj Volume | : 5.000 µl |
| Acq. Method     | : E:\DATA\GYQ\GYQ-GM\GYQ-20160730 2016-07-30 08-36-13\DAD-0J(1-6)-95-5-1.<br>OML-5-210NM-50MIN.M                   |            |            |
| Last changed    | : 7/30/2016 9:58:07 AM by SYSTEM                                                                                   |            |            |
| Analysis Method | : E:\DATA\GYQ\GYQ-GM\GYQ-20160730 2016-07-30 08-36-13\DAD-0J(1-6)-95-5-1.<br>OML-5-210NM-50MIN.M (Sequence Method) |            |            |
| Last changed    | : 6/10/2017 8:57:32 PM by SYSTEM<br>(modified after loading)                                                       |            |            |

Additional Info : Peak(s) manually integrated

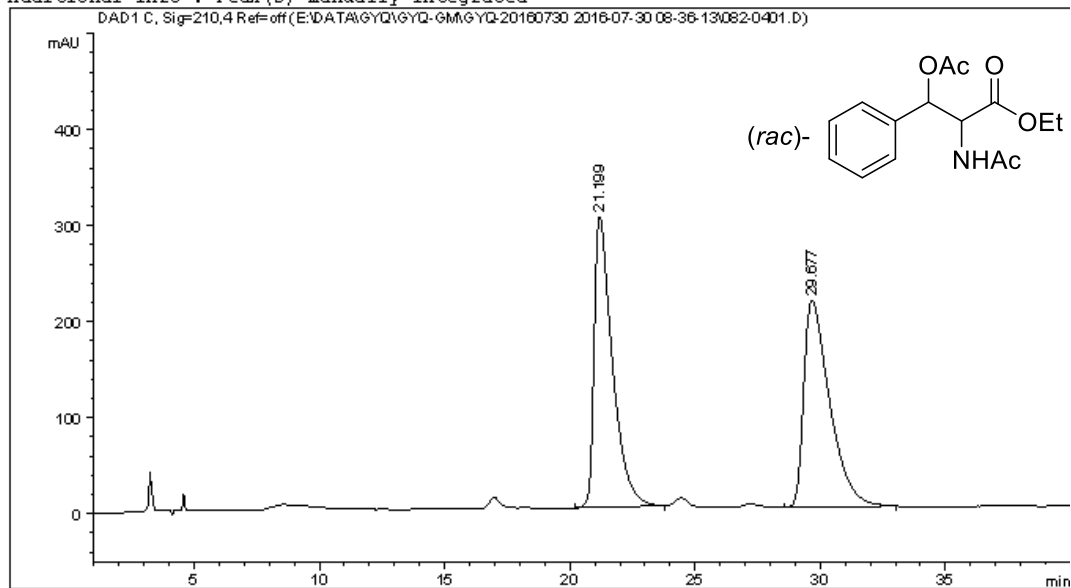

Area Percent Report

Sorted By : Signal  
Multiplier : 1.0000  
Dilution : 1.0000  
Do not use Multiplier & Dilution Factor with ISTDs

Signal 1: DAD1 C, Sig=210,4 Ref=off

| Peak # | RetTime [min] | Type | Width [min] | Area [mAU*s] | Height [mAU] | Area %  |
|--------|---------------|------|-------------|--------------|--------------|---------|
| 1      | 21.199        | BB   | 0.7367      | 1.53169e4    | 302.53458    | 49.7010 |
| 2      | 29.677        | BB   | 1.0322      | 1.55012e4    | 215.25539    | 50.2990 |

Totals : 3.08182e4 517.78996

\*\*\* End of Report \*\*\*

Data File E:\DATA\GYQ\GYQ-GM\GYQ-20160730 2016-07-30 08-36-13\083-0501.D  
Sample Name: 30 bar

=====

|                 |                                                                                                                    |            |            |
|-----------------|--------------------------------------------------------------------------------------------------------------------|------------|------------|
| Acq. Operator   | : SYSTEM                                                                                                           | Seq. Line  | : 5        |
| Acq. Instrument | : 1260HPLC-DAD                                                                                                     | Location   | : Vial 83  |
| Injection Date  | : 7/30/2016 10:47:56 AM                                                                                            | Inj        | : 1        |
|                 |                                                                                                                    | Inj Volume | : 5.000 µl |
| Acq. Method     | : E:\DATA\GYQ\GYQ-GM\GYQ-20160730 2016-07-30 08-36-13\DAD-0J(1-6)-95-5-1.<br>OML-5-210NM-50MIN.M                   |            |            |
| Last changed    | : 7/30/2016 9:58:07 AM by SYSTEM                                                                                   |            |            |
| Analysis Method | : E:\DATA\GYQ\GYQ-GM\GYQ-20160730 2016-07-30 08-36-13\DAD-0J(1-6)-95-5-1.<br>OML-5-210NM-50MIN.M (Sequence Method) |            |            |
| Last changed    | : 6/10/2017 9:01:32 PM by SYSTEM<br>(modified after loading)                                                       |            |            |

Additional Info : Peak(s) manually integrated

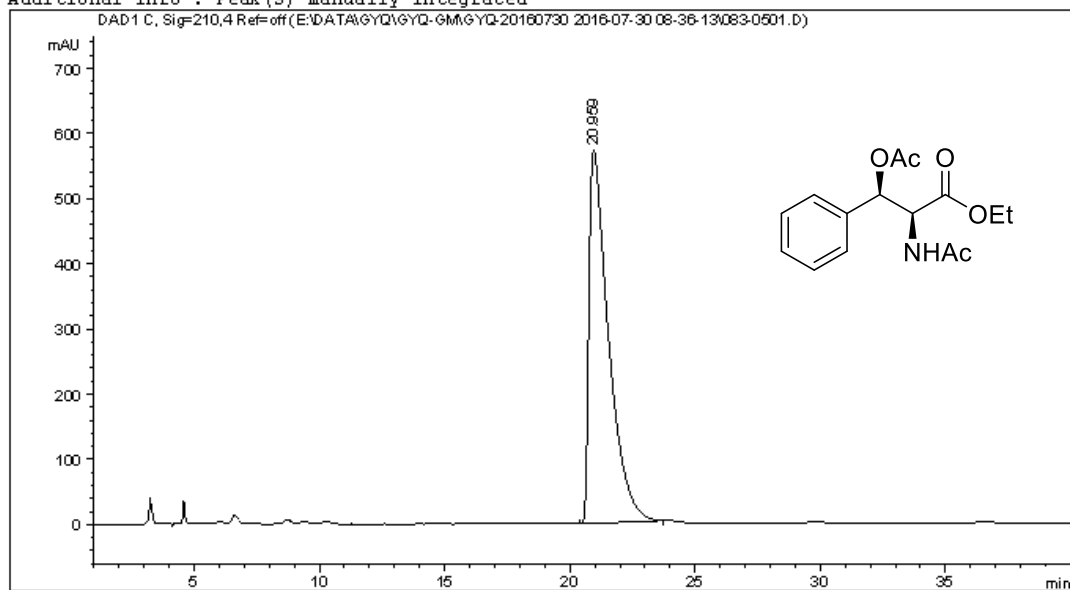

=====  
Area Percent Report  
=====

Sorted By : Signal  
Multiplier : 1.0000  
Dilution : 1.0000  
Do not use Multiplier & Dilution Factor with ISTDs

Signal 1: DAD1 C, Sig=210,4 Ref=off

| Peak # | RetTime [min] | Type | Width [min] | Area [mAU*s] | Height [mAU] | Area %   |
|--------|---------------|------|-------------|--------------|--------------|----------|
| 1      | 20.959        | BB   | 0.7764      | 3.09458e4    | 572.71411    | 100.0000 |

Totals : 3.09458e4 572.71411

=====  
\*\*\* End of Report \*\*\*

Data File E:\DATA\GYQ\GYQ-GM\VWD-PH-COOME-EE 2016-11-28 09-25-26\016-0201.D  
Sample Name: PH-COOME-RAC

=====

|                                               |                                                                                                                 |            |            |
|-----------------------------------------------|-----------------------------------------------------------------------------------------------------------------|------------|------------|
| Acq. Operator                                 | : SYSTEM                                                                                                        | Seq. Line  | : 2        |
| Acq. Instrument                               | : 1260HPLC-VWD                                                                                                  | Location   | : Vial 16  |
| Injection Date                                | : 11/28/2016 9:46:59 AM                                                                                         | Inj        | : 1        |
|                                               |                                                                                                                 | Inj Volume | : 5.000 µl |
| Acq. Method                                   | : E:\DATA\GYQ\GYQ-GM\VWD-PH-COOME-EE 2016-11-28 09-25-26\VWD-0J(1-6)-95-5-1.0ML-210NM-75MIN.M                   |            |            |
| Last changed                                  | : 11/28/2016 9:25:26 AM by SYSTEM                                                                               |            |            |
| Analysis Method                               | : E:\DATA\GYQ\GYQ-GM\VWD-PH-COOME-EE 2016-11-28 09-25-26\VWD-0J(1-6)-95-5-1.0ML-210NM-75MIN.M (Sequence Method) |            |            |
| Last changed                                  | : 6/10/2017 9:04:41 PM by SYSTEM                                                                                |            |            |
|                                               | (modified after loading)                                                                                        |            |            |
| Additional Info : Peak(s) manually integrated |                                                                                                                 |            |            |

=====

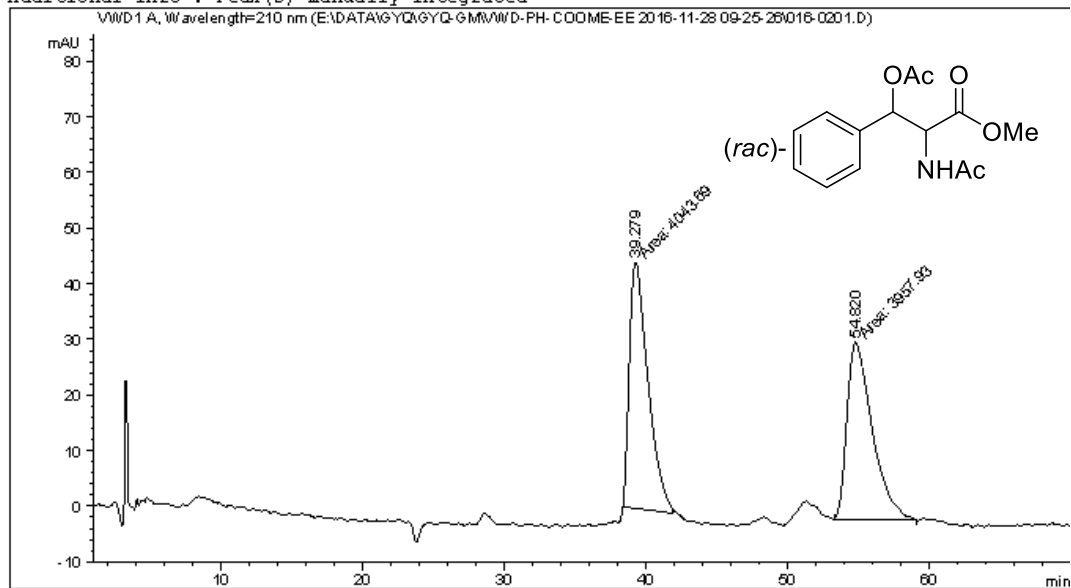

=====  
Area Percent Report  
=====

Sorted By : Signal  
Multiplier : 1.0000  
Dilution : 1.0000  
Do not use Multiplier & Dilution Factor with ISTDs

Signal 1: VWD1 A, Wavelength=210 nm

| Peak # | RetTime [min] | Type | Width [min] | Area [mAU*s] | Height [mAU] | Area %  |
|--------|---------------|------|-------------|--------------|--------------|---------|
| 1      | 39.279        | MM   | 1.5213      | 4043.68604   | 44.30155     | 50.5359 |
| 2      | 54.820        | MM   | 2.0652      | 3957.92822   | 31.94175     | 49.4641 |

Totals : 8001.61426 76.24330

=====  
\*\*\* End of Report \*\*\*

Data File E:\DATA\GYQ\GYQ-GM\VWD-PH-COOME-EE 2016-11-28 09-25-26\017-0301.D  
Sample Name: PH-COOME-EE

```
=====
Acq. Operator   : SYSTEM                      Seq. Line :    3
Acq. Instrument : 1260HPLC-VWD                Location  : Vial 17
Injection Date  : 11/28/2016 11:02:44 AM      Inj       :    1
                                           Inj Volume: 5.000 µl
Acq. Method     : E:\DATA\GYQ\GYQ-GM\VWD-PH-COOME-EE 2016-11-28 09-25-26\VWD-0J(1-6)-95-5-
                                           1.0ML-210NM-75MIN.M
Last changed    : 11/28/2016 9:25:26 AM by SYSTEM
Analysis Method : E:\DATA\GYQ\GYQ-GM\VWD-PH-COOME-EE 2016-11-28 09-25-26\VWD-0J(1-6)-95-5-
                                           1.0ML-210NM-75MIN.M (Sequence Method)
Last changed    : 6/10/2017 9:08:02 PM by SYSTEM
                                           (modified after loading)
Additional Info  : Peak(s) manually integrated
=====
```

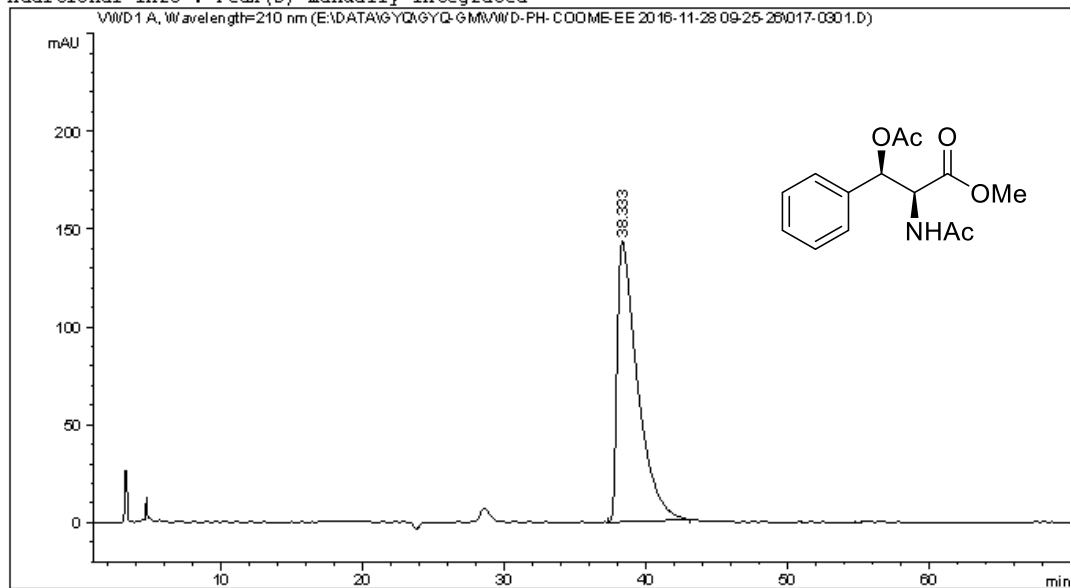

=====  
Area Percent Report  
=====

Sorted By : Signal  
Multiplier : 1.0000  
Dilution : 1.0000  
Do not use Multiplier & Dilution Factor with ISTDs

Signal 1: VWD1 A, Wavelength=210 nm

| Peak # | RetTime [min] | Type | Width [min] | Area [mAU*s] | Height [mAU] | Area %   |
|--------|---------------|------|-------------|--------------|--------------|----------|
| 1      | 38.333        | BB   | 1.4611      | 1.43183e4    | 143.24849    | 100.0000 |

Totals : 1.43183e4 143.24849

=====  
\*\*\* End of Report \*\*\*

Data File E:\DATA\GYQ\GYQ-GM\4-ME&4-MEO 2016-10-15 18-30-55\073-0601.D  
Sample Name: 4-Me-rac

=====

|                 |                                                                                                              |            |            |
|-----------------|--------------------------------------------------------------------------------------------------------------|------------|------------|
| Acq. Operator   | : SYSTEM                                                                                                     | Seq. Line  | : 6        |
| Acq. Instrument | : 1260HPLC-DAD                                                                                               | Location   | : Vial 73  |
| Injection Date  | : 10/15/2016 10:33:42 PM                                                                                     | Inj        | : 1        |
|                 |                                                                                                              | Inj Volume | : 5.000 µl |
| Acq. Method     | : E:\DATA\GYQ\GYQ-GM\4-ME&4-MEO 2016-10-15 18-30-55\DAD-0J(1-6)-95-5-1.OML-5-210NM-50MIN.M                   |            |            |
| Last changed    | : 10/15/2016 6:30:56 PM by SYSTEM                                                                            |            |            |
| Analysis Method | : E:\DATA\GYQ\GYQ-GM\4-ME&4-MEO 2016-10-15 18-30-55\DAD-0J(1-6)-95-5-1.OML-5-210NM-50MIN.M (Sequence Method) |            |            |
| Last changed    | : 6/10/2017 9:10:36 PM by SYSTEM (modified after loading)                                                    |            |            |

Additional Info : Peak(s) manually integrated

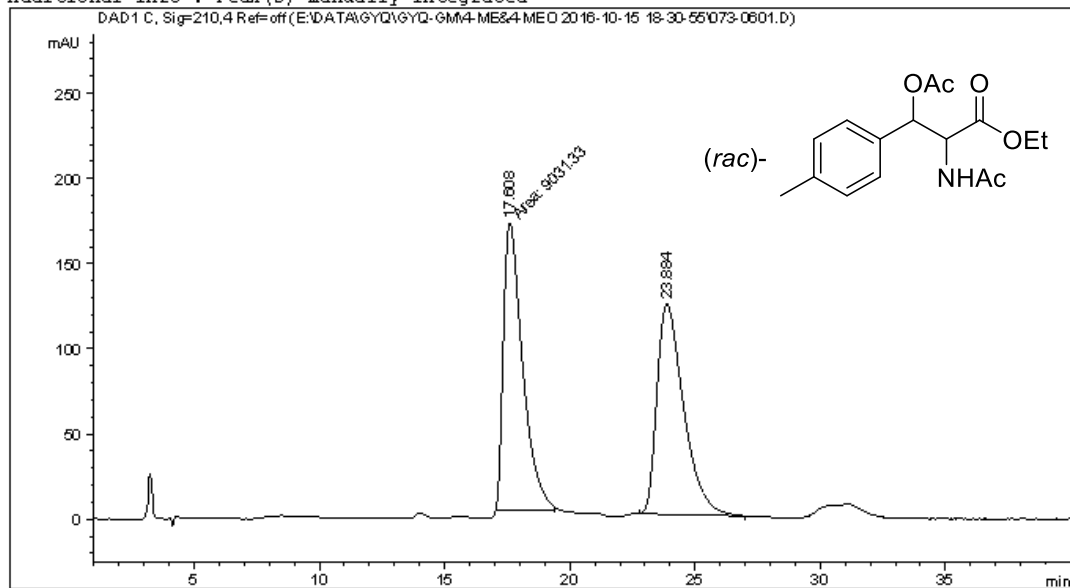

=====  
Area Percent Report  
=====

Sorted By : Signal  
Multiplier : 1.0000  
Dilution : 1.0000  
Do not use Multiplier & Dilution Factor with ISTDs

Signal 1: DAD1 C, Sig=210,4 Ref=off

| Peak # | RetTime [min] | Type | Width [min] | Area [mAU*s] | Height [mAU] | Area %  |
|--------|---------------|------|-------------|--------------|--------------|---------|
| 1      | 17.608        | MM   | 0.8916      | 9031.32617   | 168.82851    | 49.6320 |
| 2      | 23.884        | BB   | 0.9673      | 9165.26660   | 123.57682    | 50.3680 |

Totals : 1.81966e4 292.40533

=====  
\*\*\* End of Report \*\*\*

Data File E:\DATA\GYQ\GYQ-GM\4-ME&4-MEO 2016-10-15 18-30-55\074-0701.D  
Sample Name: 4-Me-ee

=====

|                 |                                                                                                              |            |            |
|-----------------|--------------------------------------------------------------------------------------------------------------|------------|------------|
| Acq. Operator   | : SYSTEM                                                                                                     | Seq. Line  | : 7        |
| Acq. Instrument | : 1260HPLC-DAD                                                                                               | Location   | : Vial 74  |
| Injection Date  | : 10/15/2016 11:24:41 PM                                                                                     | Inj        | : 1        |
|                 |                                                                                                              | Inj Volume | : 5.000 µl |
| Acq. Method     | : E:\DATA\GYQ\GYQ-GM\4-ME&4-MEO 2016-10-15 18-30-55\DAD-0J(1-6)-95-5-1.OML-5-210NM-50MIN.M                   |            |            |
| Last changed    | : 10/15/2016 6:30:56 PM by SYSTEM                                                                            |            |            |
| Analysis Method | : E:\DATA\GYQ\GYQ-GM\4-ME&4-MEO 2016-10-15 18-30-55\DAD-0J(1-6)-95-5-1.OML-5-210NM-50MIN.M (Sequence Method) |            |            |
| Last changed    | : 6/10/2017 9:12:41 PM by SYSTEM<br>(modified after loading)                                                 |            |            |

Additional Info : Peak(s) manually integrated

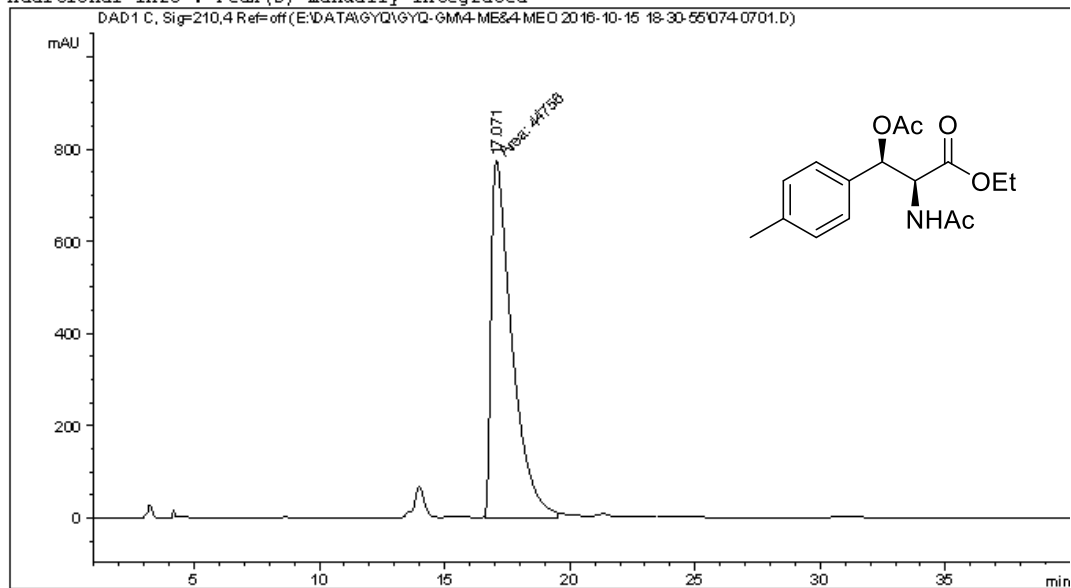

=====  
Area Percent Report  
=====

Sorted By : Signal  
Multiplier : 1.0000  
Dilution : 1.0000  
Do not use Multiplier & Dilution Factor with ISTDs

Signal 1: DAD1 C, Sig=210,4 Ref=off

| Peak # | RetTime [min] | Type | Width [min] | Area [mAU*s] | Height [mAU] | Area %   |
|--------|---------------|------|-------------|--------------|--------------|----------|
| 1      | 17.071        | MM   | 0.9642      | 4.47560e4    | 773.66003    | 100.0000 |

Totals : 4.47560e4 773.66003

=====  
\*\*\* End of Report \*\*\*



Data File E:\DATA\GYQ\GYQ-GM\4-ME&4-MEO 2016-10-15 18-30-55\071-0401.D  
Sample Name: 4-MeO-rac

=====

|                 |                                                                                                                  |            |             |
|-----------------|------------------------------------------------------------------------------------------------------------------|------------|-------------|
| Acq. Operator   | : SYSTEM                                                                                                         | Seq. Line  | : 4         |
| Acq. Instrument | : 1260HPLC-DAD                                                                                                   | Location   | : Vial 71   |
| Injection Date  | : 10/15/2016 9:06:45 PM                                                                                          | Inj        | : 1         |
|                 |                                                                                                                  | Inj Volume | : 10.000 µl |
| Acq. Method     | : E:\DATA\GYQ\GYQ-GM\4-ME&4-MEO 2016-10-15 18-30-55\DAD-0J(1-6)-94-6-1.OML<br>-5-210NM-65MIN.M                   |            |             |
| Last changed    | : 10/15/2016 6:30:55 PM by SYSTEM                                                                                |            |             |
| Analysis Method | : E:\DATA\GYQ\GYQ-GM\4-ME&4-MEO 2016-10-15 18-30-55\DAD-0J(1-6)-94-6-1.OML<br>-5-210NM-65MIN.M (Sequence Method) |            |             |
| Last changed    | : 6/10/2017 9:16:27 PM by SYSTEM<br>(modified after loading)                                                     |            |             |

Additional Info : Peak(s) manually integrated

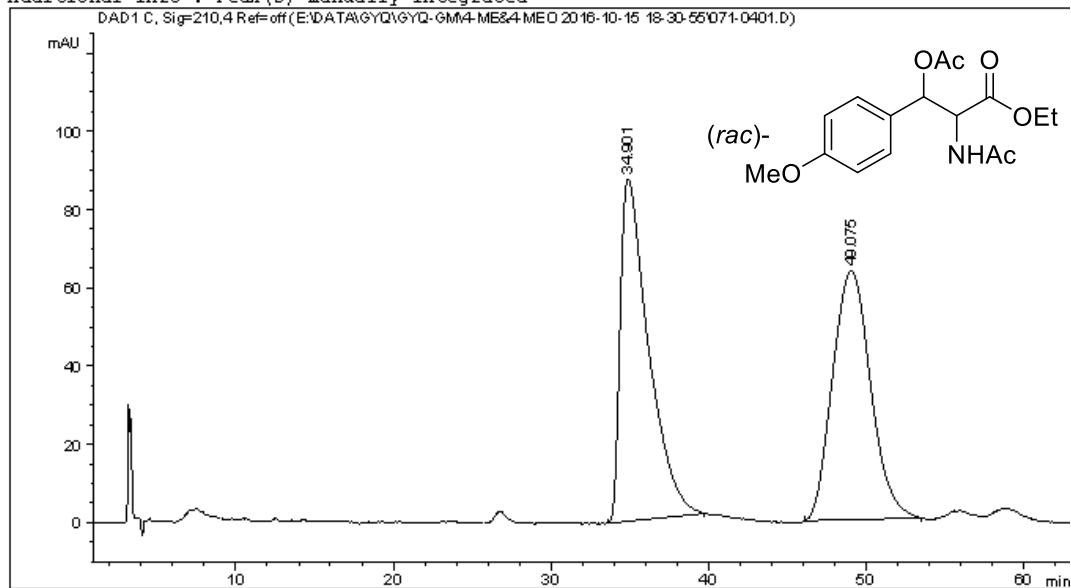

=====  
Area Percent Report  
=====

Sorted By : Signal  
Multiplier : 1.0000  
Dilution : 1.0000  
Do not use Multiplier & Dilution Factor with ISTDs

Signal 1: DAD1 C, Sig=210,4 Ref=off

| Peak # | RetTime [min] | Type | Width [min] | Area [mAU*s] | Height [mAU] | Area %  |
|--------|---------------|------|-------------|--------------|--------------|---------|
| 1      | 34.901        | BB   | 1.4598      | 1.09251e4    | 87.55154     | 50.5613 |
| 2      | 49.075        | BB   | 1.9706      | 1.06826e4    | 63.63345     | 49.4387 |

Totals : 2.16077e4 151.18500

=====  
\*\*\* End of Report \*\*\*

Data File E:\DATA\GYQ\GYQ-GM\4-ME&4-MEO 2016-10-15 18-30-55\072-0301.D  
Sample Name: 4-MeO-ee

=====

|                 |                                                                                                              |            |             |
|-----------------|--------------------------------------------------------------------------------------------------------------|------------|-------------|
| Acq. Operator   | : SYSTEM                                                                                                     | Seq. Line  | : 3         |
| Acq. Instrument | : 1260HPLC-DAD                                                                                               | Location   | : Vial 72   |
| Injection Date  | : 10/15/2016 8:00:47 PM                                                                                      | Inj        | : 1         |
|                 |                                                                                                              | Inj Volume | : 10.000 µl |
| Acq. Method     | : E:\DATA\GYQ\GYQ-GM\4-ME&4-MEO 2016-10-15 18-30-55\DAD-0J(1-6)-94-6-1.OML-5-210NM-65MIN.M                   |            |             |
| Last changed    | : 10/15/2016 6:30:55 PM by SYSTEM                                                                            |            |             |
| Analysis Method | : E:\DATA\GYQ\GYQ-GM\4-ME&4-MEO 2016-10-15 18-30-55\DAD-0J(1-6)-94-6-1.OML-5-210NM-65MIN.M (Sequence Method) |            |             |
| Last changed    | : 6/10/2017 9:17:51 PM by SYSTEM<br>(modified after loading)                                                 |            |             |

Additional Info : Peak(s) manually integrated

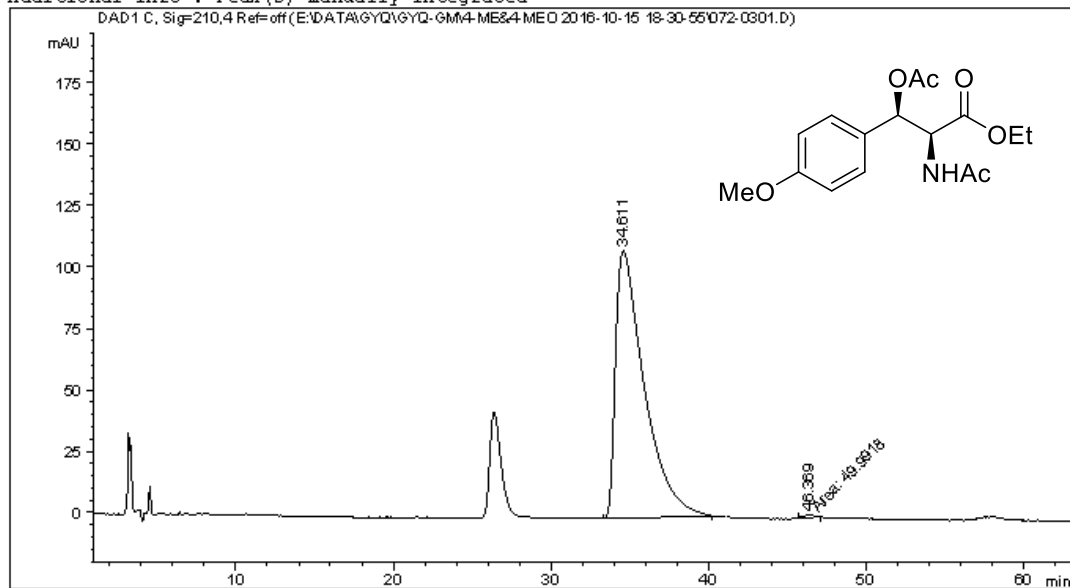

=====  
Area Percent Report  
=====

Sorted By : Signal  
Multiplier : 1.0000  
Dilution : 1.0000  
Do not use Multiplier & Dilution Factor with ISTDs

Signal 1: DAD1 C, Sig=210,4 Ref=off

| Peak # | RetTime [min] | Type | Width [min] | Area [mAU*s] | Height [mAU] | Area %  |
|--------|---------------|------|-------------|--------------|--------------|---------|
| 1      | 34.611        | BB   | 1.4914      | 1.37987e4    | 108.81527    | 99.6390 |
| 2      | 46.369        | MM   | 0.8820      | 49.99180     | 9.44638e-1   | 0.3610  |

Totals : 1.38487e4 109.75991

=====  
\*\*\* End of Report \*\*\*

Data File E:\DATA\GYQ\GYQ-GM\4-CL 2016-10-18 16-37-48\033-1501.D  
Sample Name: 4-Cl-rac

=====

|                 |                                                                                                  |            |            |
|-----------------|--------------------------------------------------------------------------------------------------|------------|------------|
| Acq. Operator   | : SYSTEM                                                                                         | Seq. Line  | : 15       |
| Acq. Instrument | : 1260HPLC-DAD                                                                                   | Location   | : Vial 33  |
| Injection Date  | : 10/19/2016 12:32:34 AM                                                                         | Inj        | : 1        |
|                 |                                                                                                  | Inj Volume | : 5.000 µl |
| Acq. Method     | : E:\DATA\GYQ\GYQ-GM\4-CL 2016-10-18 16-37-48\DAD-0D(1-2)-95-5-1ML-50MIN-210.M                   |            |            |
| Last changed    | : 10/18/2016 4:37:50 PM by SYSTEM                                                                |            |            |
| Analysis Method | : E:\DATA\GYQ\GYQ-GM\4-CL 2016-10-18 16-37-48\DAD-0D(1-2)-95-5-1ML-50MIN-210.M (Sequence Method) |            |            |
| Last changed    | : 6/10/2017 9:20:10 PM by SYSTEM<br>(modified after loading)                                     |            |            |

Additional Info : Peak(s) manually integrated

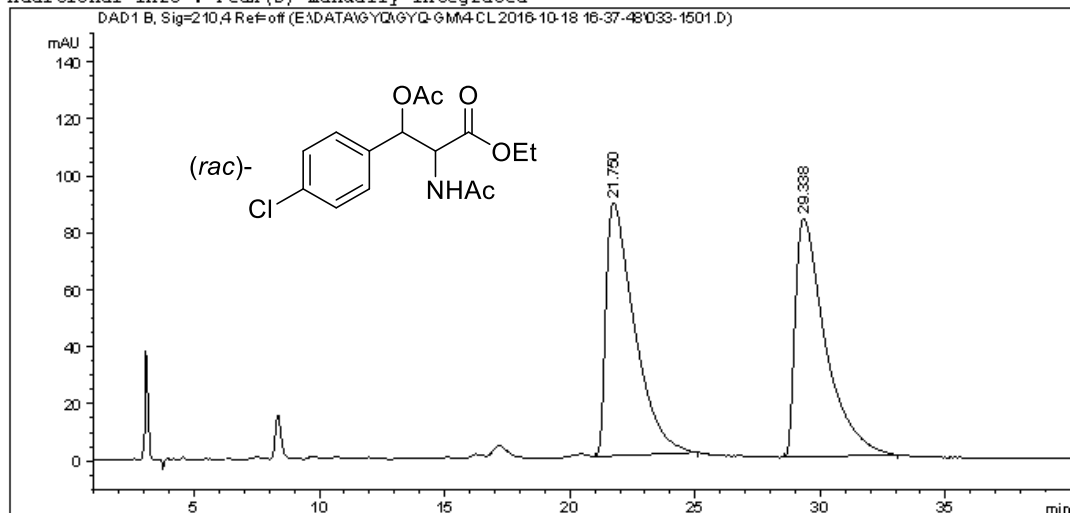

=====  
Area Percent Report  
=====

Sorted By : Signal  
Multiplier : 1.0000  
Dilution : 1.0000  
Do not use Multiplier & Dilution Factor with ISTDs

Signal 1: DAD1 B, Sig=210,4 Ref=off

| Peak # | RetTime [min] | Type | Width [min] | Area [mAU*s] | Height [mAU] | Area %  |
|--------|---------------|------|-------------|--------------|--------------|---------|
| 1      | 21.750        | BB   | 0.9250      | 6998.43799   | 88.84822     | 49.9765 |
| 2      | 29.338        | BB   | 1.0107      | 7005.03320   | 83.84902     | 50.0235 |

Totals : 1.40035e4 172.69724

=====  
\*\*\* End of Report \*\*\*

Data File E:\DATA\GYQ\GYQ-GM\4-CL 2016-10-18 16-37-48\034-1601.D  
Sample Name: 4-CL-ee

=====

|                                               |                                                                                                  |            |            |
|-----------------------------------------------|--------------------------------------------------------------------------------------------------|------------|------------|
| Acq. Operator                                 | : SYSTEM                                                                                         | Seq. Line  | : 16       |
| Acq. Instrument                               | : 1260HPLC-DAD                                                                                   | Location   | : Vial 34  |
| Injection Date                                | : 10/19/2016 1:23:28 AM                                                                          | Inj        | : 1        |
|                                               |                                                                                                  | Inj Volume | : 5.000 µl |
| Acq. Method                                   | : E:\DATA\GYQ\GYQ-GM\4-CL 2016-10-18 16-37-48\DAD-0D(1-2)-95-5-1ML-50MIN-210.M                   |            |            |
| Last changed                                  | : 10/18/2016 4:37:50 PM by SYSTEM                                                                |            |            |
| Analysis Method                               | : E:\DATA\GYQ\GYQ-GM\4-CL 2016-10-18 16-37-48\DAD-0D(1-2)-95-5-1ML-50MIN-210.M (Sequence Method) |            |            |
| Last changed                                  | : 6/10/2017 9:22:13 PM by SYSTEM                                                                 |            |            |
|                                               | (modified after loading)                                                                         |            |            |
| Additional Info : Peak(s) manually integrated |                                                                                                  |            |            |

=====

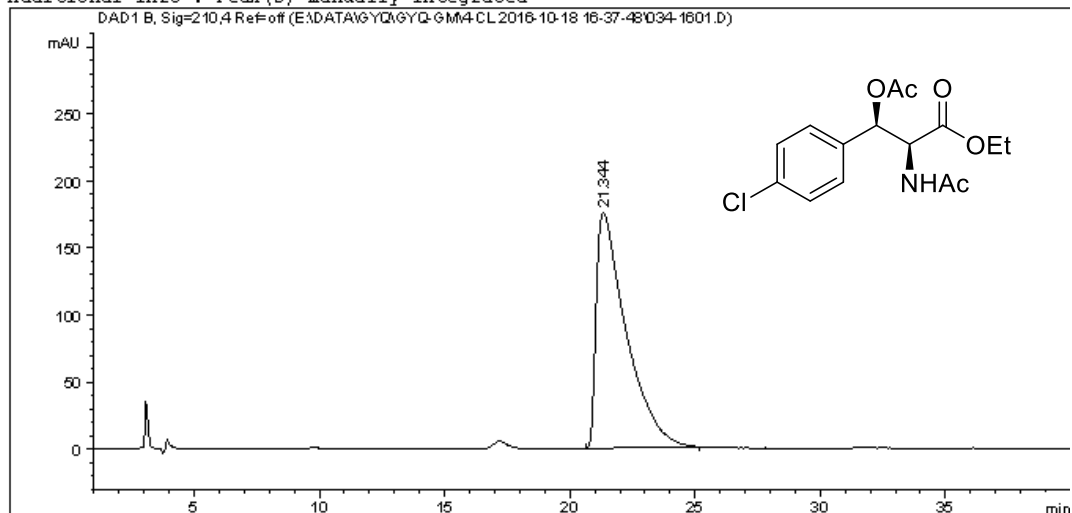

=====  
Area Percent Report  
=====

Sorted By : Signal  
Multiplier : 1.0000  
Dilution : 1.0000  
Do not use Multiplier & Dilution Factor with ISTDs

Signal 1: DAD1 B, Sig=210,4 Ref=off

| Peak # | RetTime [min] | Type | Width [min] | Area [mAU*s] | Height [mAU] | Area %   |
|--------|---------------|------|-------------|--------------|--------------|----------|
| 1      | 21.344        | BB   | 1.0863      | 1.46163e4    | 175.73535    | 100.0000 |

Totals : 1.46163e4 175.73535

=====  
\*\*\* End of Report \*\*\*

Data File E:\DATA\GYQ\GYQ-GM\2-F&4-F 2016-12-01 11-52-30\018-0401.D  
Sample Name: 4-F-RAC

=====

|                 |                                                                                                             |            |            |
|-----------------|-------------------------------------------------------------------------------------------------------------|------------|------------|
| Acq. Operator   | : SYSTEM                                                                                                    | Seq. Line  | : 4        |
| Acq. Instrument | : 1260HPLC-VWD                                                                                              | Location   | : Vial 18  |
| Injection Date  | : 12/1/2016 1:56:34 PM                                                                                      | Inj        | : 1        |
|                 |                                                                                                             | Inj Volume | : 5.000 µl |
| Acq. Method     | : E:\DATA\GYQ\GYQ-GM\2-F&4-F 2016-12-01 11-52-30\VWD-0J(1-2)-95-5-1.0ML-5UL-210NM-40MIN.M                   |            |            |
| Last changed    | : 12/1/2016 11:52:30 AM by SYSTEM                                                                           |            |            |
| Analysis Method | : E:\DATA\GYQ\GYQ-GM\2-F&4-F 2016-12-01 11-52-30\VWD-0J(1-2)-95-5-1.0ML-5UL-210NM-40MIN.M (Sequence Method) |            |            |
| Last changed    | : 6/10/2017 9:28:49 PM by SYSTEM<br>(modified after loading)                                                |            |            |

Additional Info : Peak(s) manually integrated

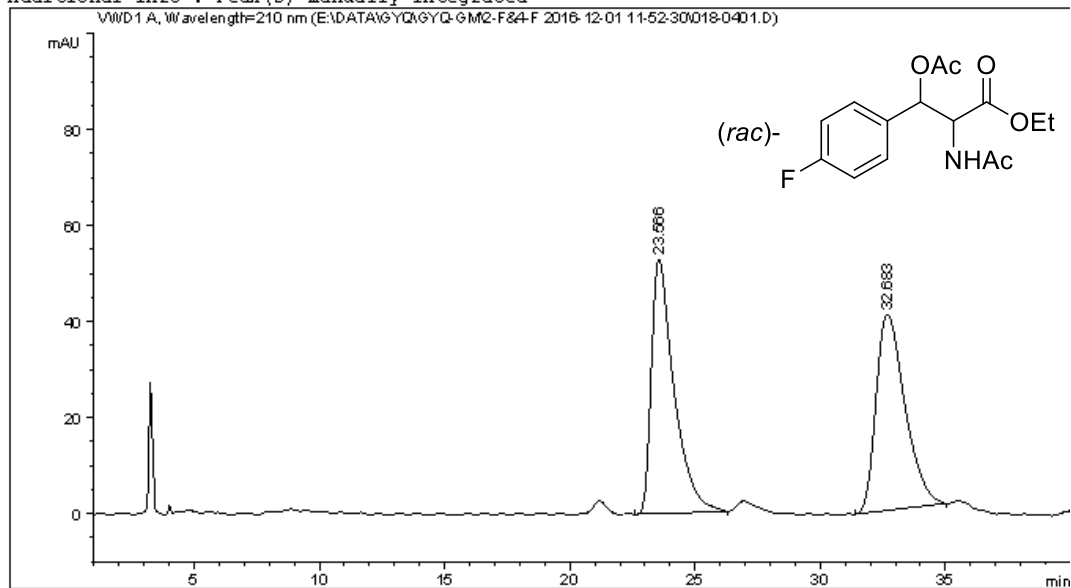

=====  
Area Percent Report  
=====

Sorted By : Signal  
Multiplier : 1.0000  
Dilution : 1.0000  
Do not use Multiplier & Dilution Factor with ISTDs

Signal 1: VWD1 A, Wavelength=210 nm

| Peak # | RetTime [min] | Type | Width [min] | Area [mAU*s] | Height [mAU] | Area %  |
|--------|---------------|------|-------------|--------------|--------------|---------|
| 1      | 23.566        | BB   | 0.9158      | 3328.55859   | 53.06331     | 50.3793 |
| 2      | 32.683        | BB   | 1.2065      | 3278.43726   | 40.71347     | 49.6207 |

Totals : 6606.99585 93.77678

=====  
\*\*\* End of Report \*\*\*

Data File E:\DATA\GYQ\GYQ-GM\2-F&4-F 2016-12-01 11-52-30\019-0501.D  
Sample Name: 4-F-EE

=====

|                                               |                                                                                                             |            |            |
|-----------------------------------------------|-------------------------------------------------------------------------------------------------------------|------------|------------|
| Acq. Operator                                 | : SYSTEM                                                                                                    | Seq. Line  | : 5        |
| Acq. Instrument                               | : 1260HPLC-VWD                                                                                              | Location   | : Vial 19  |
| Injection Date                                | : 12/1/2016 2:37:21 PM                                                                                      | Inj        | : 1        |
|                                               |                                                                                                             | Inj Volume | : 5.000 µl |
| Acq. Method                                   | : E:\DATA\GYQ\GYQ-GM\2-F&4-F 2016-12-01 11-52-30\VWD-0J(1-2)-95-5-1.0ML-5UL-210NM-40MIN.M                   |            |            |
| Last changed                                  | : 12/1/2016 11:52:30 AM by SYSTEM                                                                           |            |            |
| Analysis Method                               | : E:\DATA\GYQ\GYQ-GM\2-F&4-F 2016-12-01 11-52-30\VWD-0J(1-2)-95-5-1.0ML-5UL-210NM-40MIN.M (Sequence Method) |            |            |
| Last changed                                  | : 6/10/2017 9:30:30 PM by SYSTEM                                                                            |            |            |
|                                               | (modified after loading)                                                                                    |            |            |
| Additional Info : Peak(s) manually integrated |                                                                                                             |            |            |

=====

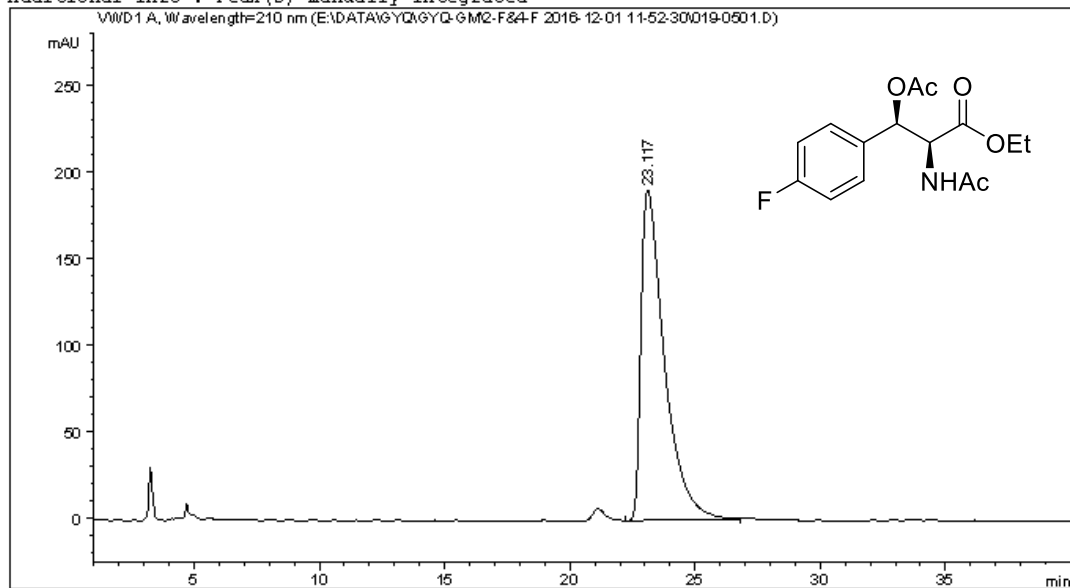

=====  
Area Percent Report  
=====

Sorted By : Signal  
Multiplier : 1.0000  
Dilution : 1.0000  
Do not use Multiplier & Dilution Factor with ISTDs

Signal 1: VWD1 A, Wavelength=210 nm

| Peak # | RetTime [min] | Type | Width [min] | Area [mAU*s] | Height [mAU] | Area %   |
|--------|---------------|------|-------------|--------------|--------------|----------|
| 1      | 23.117        | BB   | 0.9716      | 1.23525e4    | 190.71989    | 100.0000 |

Totals : 1.23525e4 190.71989

=====  
\*\*\* End of Report \*\*\*

Data File E:\DATA\GYQ\GYQ-GM\ME&YIDINGJI-EE 2016-12-07 22-06-14\086-1201.D  
Sample Name: yidingji-rac

=====

|                 |                                                                            |            |             |
|-----------------|----------------------------------------------------------------------------|------------|-------------|
| Acq. Operator   | : SYSTEM                                                                   | Seq. Line  | : 12        |
| Acq. Instrument | : 1260HPLC-DAD                                                             | Location   | : Vial 86   |
| Injection Date  | : 12/8/2016 4:19:51 AM                                                     | Inj        | : 1         |
|                 |                                                                            | Inj Volume | : 10.000 µl |
| Acq. Method     | : E:\DATA\GYQ\GYQ-GM\ME&YIDINGJI-EE 2016-12-07 22-06-14\DAD-0J(1-6)-97-3-1 |            |             |
|                 | .OML-10-210NM-75MIN.M                                                      |            |             |
| Last changed    | : 12/7/2016 10:06:16 PM by SYSTEM                                          |            |             |
| Analysis Method | : E:\DATA\GYQ\GYQ-GM\ME&YIDINGJI-EE 2016-12-07 22-06-14\DAD-0J(1-6)-97-3-1 |            |             |
|                 | .OML-10-210NM-75MIN.M (Sequence Method)                                    |            |             |
| Last changed    | : 6/10/2017 9:45:48 PM by SYSTEM                                           |            |             |
|                 | (modified after loading)                                                   |            |             |
| Additional Info | : Peak(s) manually integrated                                              |            |             |

=====

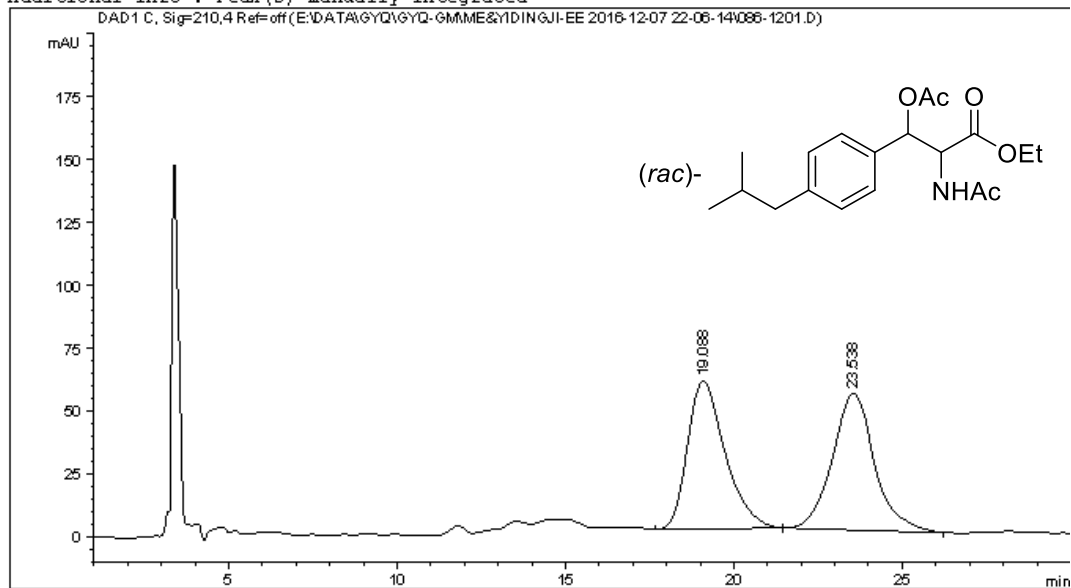

=====  
Area Percent Report  
=====

Sorted By : Signal  
Multiplier : 1.0000  
Dilution : 1.0000  
Do not use Multiplier & Dilution Factor with ISTDs

Signal 1: DAD1 C, Sig=210,4 Ref=off

| Peak # | RetTime [min] | Type | Width [min] | Area [mAU*s] | Height [mAU] | Area %  |
|--------|---------------|------|-------------|--------------|--------------|---------|
| 1      | 19.088        | BB   | 1.1227      | 4571.60693   | 58.95211     | 49.1674 |
| 2      | 23.538        | BB   | 1.1568      | 4726.43604   | 54.33568     | 50.8326 |

Totals : 9298.04297 113.28780

=====  
\*\*\* End of Report \*\*\*

Data File E:\DATA\GYQ\GYQ-GM\ME&YIDINGJI-EE 2016-12-07 22-06-14\087-1301.D  
Sample Name: yidingji-ee

=====

|                                               |                                                                            |            |             |
|-----------------------------------------------|----------------------------------------------------------------------------|------------|-------------|
| Acq. Operator                                 | : SYSTEM                                                                   | Seq. Line  | : 13        |
| Acq. Instrument                               | : 1260HPLC-DAD                                                             | Location   | : Vial 87   |
| Injection Date                                | : 12/8/2016 5:35:51 AM                                                     | Inj        | : 1         |
|                                               |                                                                            | Inj Volume | : 10.000 µl |
| Acq. Method                                   | : E:\DATA\GYQ\GYQ-GM\ME&YIDINGJI-EE 2016-12-07 22-06-14\DAD-0J(1-6)-97-3-1 |            |             |
|                                               | .OML-10-210NM-75MIN.M                                                      |            |             |
| Last changed                                  | : 12/7/2016 10:06:16 PM by SYSTEM                                          |            |             |
| Analysis Method                               | : E:\DATA\GYQ\GYQ-GM\ME&YIDINGJI-EE 2016-12-07 22-06-14\DAD-0J(1-6)-97-3-1 |            |             |
|                                               | .OML-10-210NM-75MIN.M (Sequence Method)                                    |            |             |
| Last changed                                  | : 6/10/2017 9:47:02 PM by SYSTEM                                           |            |             |
|                                               | (modified after loading)                                                   |            |             |
| Additional Info : Peak(s) manually integrated |                                                                            |            |             |

=====

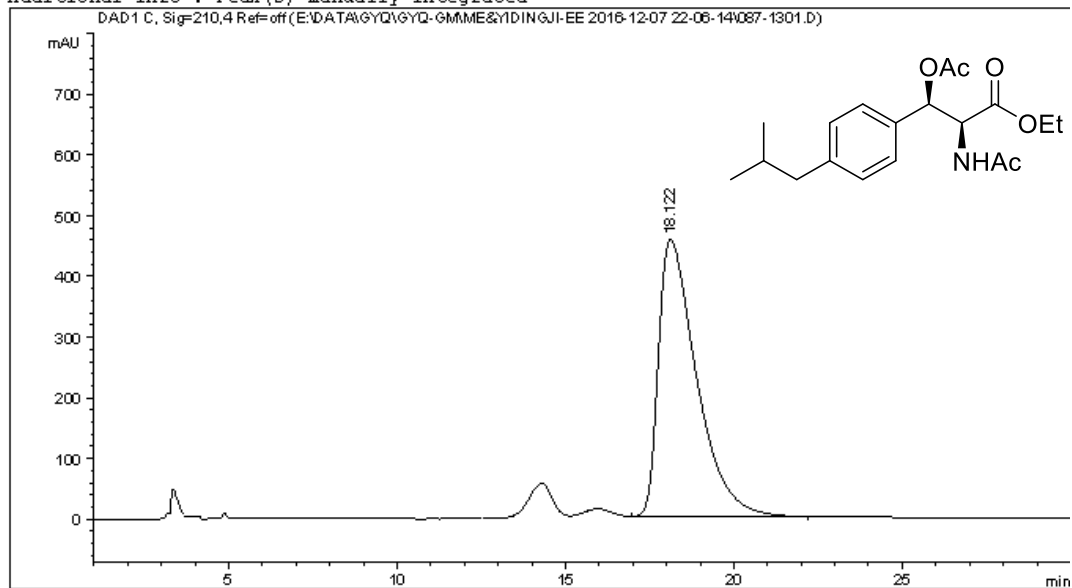

=====

Area Percent Report

=====

Sorted By : Signal  
Multiplier : 1.0000  
Dilution : 1.0000  
Do not use Multiplier & Dilution Factor with ISTDs

Signal 1: DAD1 C, Sig=210,4 Ref=off

| Peak # | RetTime [min] | Type | Width [min] | Area [mAU*s] | Height [mAU] | Area %   |
|--------|---------------|------|-------------|--------------|--------------|----------|
| 1      | 18.122        | BB   | 1.1764      | 3.58620e4    | 456.55618    | 100.0000 |

Totals : 3.58620e4 456.55618

=====

\*\*\* End of Report \*\*\*



Data File E:\DATA\GYQ\GYQ-GM\2-MEO-RAC-DAD-ODH 2016-10-23 20-33-55\024-0801.D  
Sample Name: 3-MeO-rac

=====

|                                               |                                                                                                                     |            |            |
|-----------------------------------------------|---------------------------------------------------------------------------------------------------------------------|------------|------------|
| Acq. Operator                                 | : SYSTEM                                                                                                            | Seq. Line  | : 8        |
| Acq. Instrument                               | : 1260HPLC-DAD                                                                                                      | Location   | : Vial 24  |
| Injection Date                                | : 10/24/2016 12:38:22 AM                                                                                            | Inj        | : 1        |
|                                               |                                                                                                                     | Inj Volume | : 5.000 µl |
| Acq. Method                                   | : E:\DATA\GYQ\GYQ-GM\2-MEO-RAC-DAD-ODH 2016-10-23 20-33-55\DAD-0J(1-6)-95-5-1.OML-5-210NM-50MIN.M                   |            |            |
| Last changed                                  | : 10/23/2016 10:10:49 PM by SYSTEM                                                                                  |            |            |
| Analysis Method                               | : E:\DATA\GYQ\GYQ-GM\2-MEO-RAC-DAD-ODH 2016-10-23 20-33-55\DAD-0J(1-6)-95-5-1.OML-5-210NM-50MIN.M (Sequence Method) |            |            |
| Last changed                                  | : 6/10/2017 9:49:21 PM by SYSTEM                                                                                    |            |            |
|                                               | (modified after loading)                                                                                            |            |            |
| Additional Info : Peak(s) manually integrated |                                                                                                                     |            |            |

=====

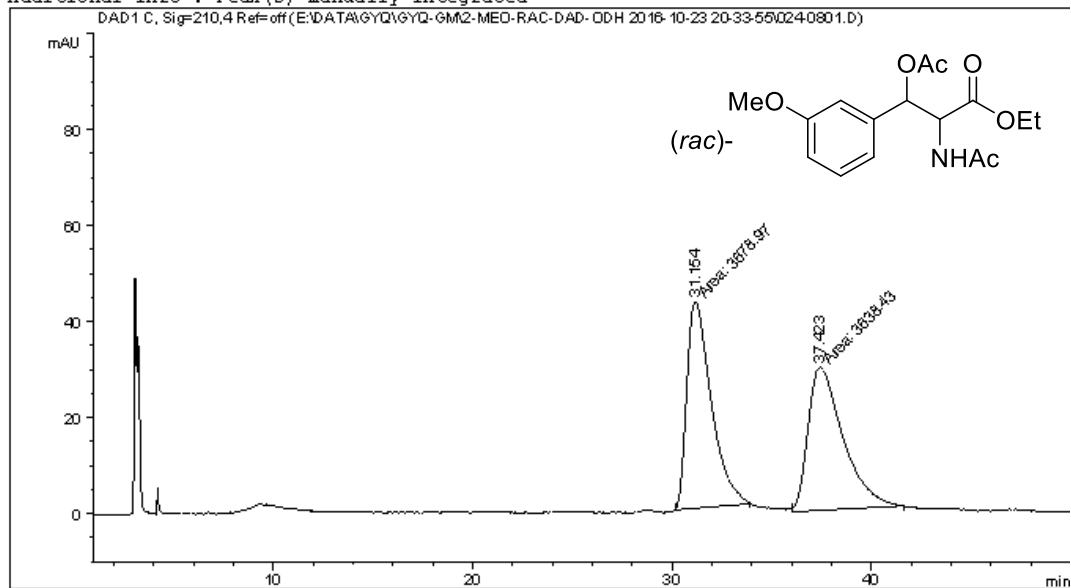

=====  
Area Percent Report  
=====

Sorted By : Signal  
Multiplier : 1.0000  
Dilution : 1.0000  
Do not use Multiplier & Dilution Factor with ISTDs

Signal 1: DAD1 C, Sig=210,4 Ref=off

| Peak # | RetTime [min] | Type | Width [min] | Area [mAU*s] | Height [mAU] | Area %  |
|--------|---------------|------|-------------|--------------|--------------|---------|
| 1      | 31.154        | MM   | 1.4238      | 3678.96729   | 43.06536     | 50.2770 |
| 2      | 37.423        | MM   | 2.0392      | 3638.43311   | 29.73787     | 49.7230 |

Totals : 7317.40039 72.80323

=====  
\*\*\* End of Report \*\*\*

Data File E:\DATA\GYQ\GYQ-GM\2-MEO-RAC-DAD-ODH 2016-10-23 20-33-55\025-0901.D  
Sample Name: 3-MeO-ee

=====

|                                               |                                                                                                                     |            |            |
|-----------------------------------------------|---------------------------------------------------------------------------------------------------------------------|------------|------------|
| Acq. Operator                                 | : SYSTEM                                                                                                            | Seq. Line  | : 9        |
| Acq. Instrument                               | : 1260HPLC-DAD                                                                                                      | Location   | : Vial 25  |
| Injection Date                                | : 10/24/2016 1:29:17 AM                                                                                             | Inj        | : 1        |
|                                               |                                                                                                                     | Inj Volume | : 5.000 µl |
| Acq. Method                                   | : E:\DATA\GYQ\GYQ-GM\2-MEO-RAC-DAD-ODH 2016-10-23 20-33-55\DAD-0J(1-6)-95-5-1.OML-5-210NM-50MIN.M                   |            |            |
| Last changed                                  | : 10/23/2016 10:10:49 PM by SYSTEM                                                                                  |            |            |
| Analysis Method                               | : E:\DATA\GYQ\GYQ-GM\2-MEO-RAC-DAD-ODH 2016-10-23 20-33-55\DAD-0J(1-6)-95-5-1.OML-5-210NM-50MIN.M (Sequence Method) |            |            |
| Last changed                                  | : 6/10/2017 9:50:49 PM by SYSTEM                                                                                    |            |            |
|                                               | (modified after loading)                                                                                            |            |            |
| Additional Info : Peak(s) manually integrated |                                                                                                                     |            |            |

=====

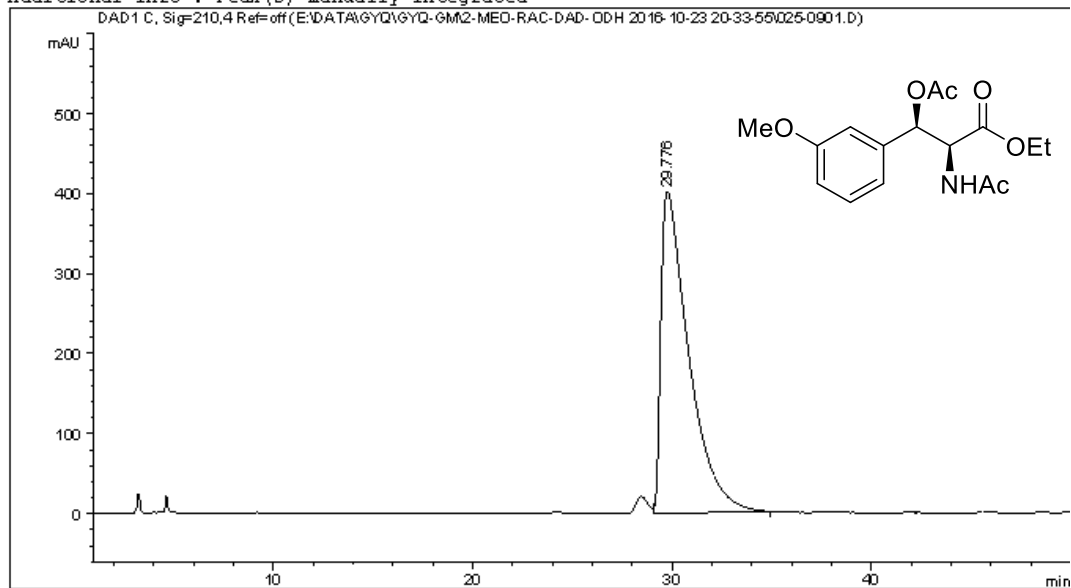

=====

Area Percent Report

=====

Sorted By : Signal  
Multiplier : 1.0000  
Dilution : 1.0000  
Do not use Multiplier & Dilution Factor with ISTDs

Signal 1: DAD1 C, Sig=210,4 Ref=off

| Peak # | RetTime [min] | Type | Width [min] | Area [mAU*s] | Height [mAU] | Area %   |
|--------|---------------|------|-------------|--------------|--------------|----------|
| 1      | 29.776        | VB   | 1.2468      | 3.88495e4    | 401.51578    | 100.0000 |

Totals : 3.88495e4 401.51578

=====

\*\*\* End of Report \*\*\*

Data File E:\DATA\GYQ\GYQ-GM\4-CL 2016-10-18 16-37-48\032-0701.D  
Sample Name: 3-F-rac

=====

|                                               |                                                                                                  |            |            |
|-----------------------------------------------|--------------------------------------------------------------------------------------------------|------------|------------|
| Acq. Operator                                 | : SYSTEM                                                                                         | Seq. Line  | : 7        |
| Acq. Instrument                               | : 1260HPLC-DAD                                                                                   | Location   | : Vial 32  |
| Injection Date                                | : 10/18/2016 8:14:45 PM                                                                          | Inj        | : 1        |
|                                               |                                                                                                  | Inj Volume | : 5.000 µl |
| Acq. Method                                   | : E:\DATA\GYQ\GYQ-GM\4-CL 2016-10-18 16-37-48\DAD-0D(1-2)-95-5-1ML-50MIN-210.M                   |            |            |
| Last changed                                  | : 10/18/2016 4:37:50 PM by SYSTEM                                                                |            |            |
| Analysis Method                               | : E:\DATA\GYQ\GYQ-GM\4-CL 2016-10-18 16-37-48\DAD-0D(1-2)-95-5-1ML-50MIN-210.M (Sequence Method) |            |            |
| Last changed                                  | : 6/10/2017 9:55:48 PM by SYSTEM                                                                 |            |            |
|                                               | (modified after loading)                                                                         |            |            |
| Additional Info : Peak(s) manually integrated |                                                                                                  |            |            |

=====

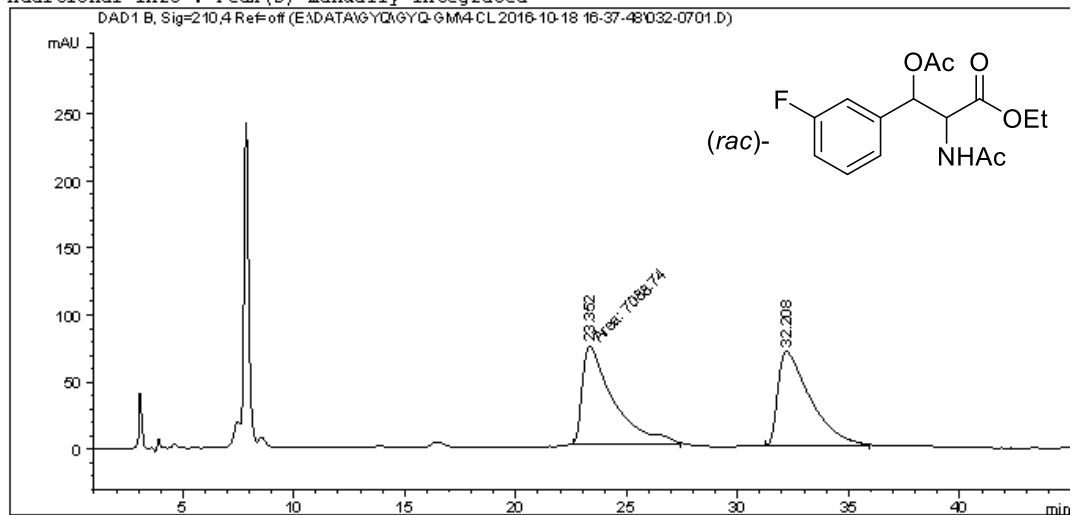

=====  
Area Percent Report  
=====

Sorted By : Signal  
Multiplier : 1.0000  
Dilution : 1.0000  
Do not use Multiplier & Dilution Factor with ISTDs

Signal 1: DAD1 B, Sig=210,4 Ref=off

| Peak # | RetTime [min] | Type | Width [min] | Area [mAU*s] | Height [mAU] | Area %  |
|--------|---------------|------|-------------|--------------|--------------|---------|
| 1      | 23.352        | MM   | 1.6241      | 7088.74121   | 72.74491     | 50.2422 |
| 2      | 32.208        | BB   | 1.1787      | 7020.39209   | 69.84410     | 49.7578 |

Totals : 1.41091e4 142.58901

=====  
\*\*\* End of Report \*\*\*

Data File E:\DATA\GYQ\GYQ-GM\2-F&4-F 2016-12-01 11-52-30\019-0501.D  
Sample Name: 4-F-EE

```
=====
Acq. Operator   : SYSTEM                      Seq. Line :    5
Acq. Instrument : 1260HPLC-VWD                Location  : Vial 19
Injection Date  : 12/1/2016 2:37:21 PM         Inj       :    1
                                           Inj Volume: 5.000 µl
Acq. Method     : E:\DATA\GYQ\GYQ-GM\2-F&4-F 2016-12-01 11-52-30\VWD-0J(1-2)-95-5-1.0ML-
                                           SUL-210NM-40MIN.M
Last changed    : 12/1/2016 11:52:30 AM by SYSTEM
Analysis Method : E:\DATA\GYQ\GYQ-GM\2-F&4-F 2016-12-01 11-52-30\VWD-0J(1-2)-95-5-1.0ML-
                                           SUL-210NM-40MIN.M (Sequence Method)
Last changed    : 6/10/2017 9:30:30 PM by SYSTEM
                                           (modified after loading)
Additional Info  : Peak(s) manually integrated
=====
```

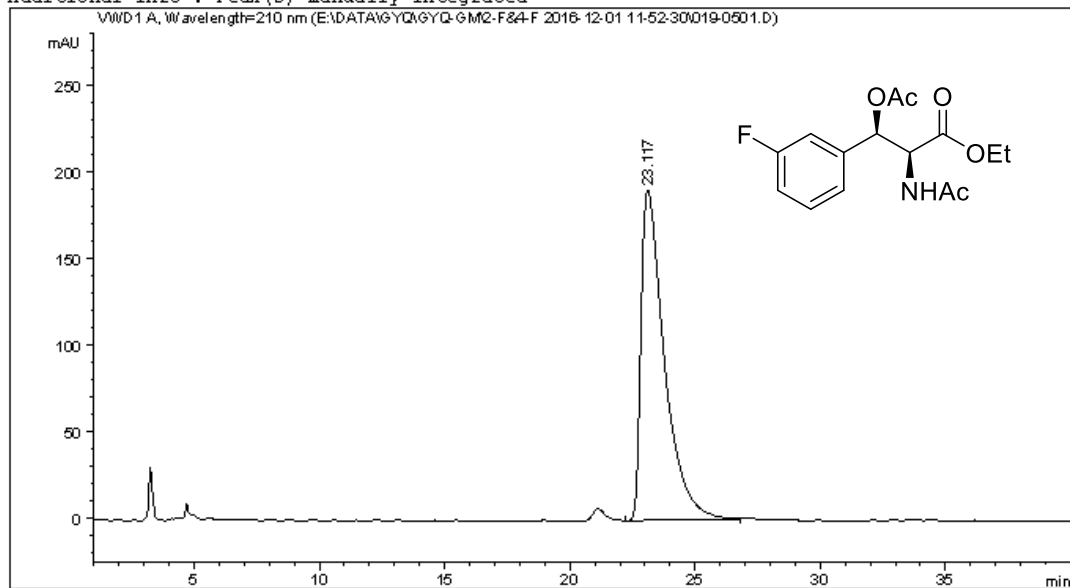

=====  
Area Percent Report  
=====

Sorted By : Signal  
Multiplier : 1.0000  
Dilution : 1.0000  
Do not use Multiplier & Dilution Factor with ISTDs

Signal 1: VWD1 A, Wavelength=210 nm

| Peak # | RetTime [min] | Type | Width [min] | Area [mAU*s] | Height [mAU] | Area %   |
|--------|---------------|------|-------------|--------------|--------------|----------|
| 1      | 23.117        | BB   | 0.9716      | 1.23525e4    | 190.71989    | 100.0000 |

Totals : 1.23525e4 190.71989

=====  
\*\*\* End of Report \*\*\*

Data File E:\DATA\GYQ\GYQ-GM\2-F&4-F 2016-12-01 11-52-30\016-0201.D  
Sample Name: 2-F-RAC

=====

|                 |                                                                                                             |            |            |
|-----------------|-------------------------------------------------------------------------------------------------------------|------------|------------|
| Acq. Operator   | : SYSTEM                                                                                                    | Seq. Line  | : 2        |
| Acq. Instrument | : 1260HPLC-VWD                                                                                              | Location   | : Vial 16  |
| Injection Date  | : 12/1/2016 12:15:02 PM                                                                                     | Inj        | : 1        |
|                 |                                                                                                             | Inj Volume | : 5.000 µl |
| Acq. Method     | : E:\DATA\GYQ\GYQ-GM\2-F&4-F 2016-12-01 11-52-30\VWD-0J(1-2)-95-5-1.0ML-3UL-210NM-60MIN.M                   |            |            |
| Last changed    | : 12/1/2016 11:52:30 AM by SYSTEM                                                                           |            |            |
| Analysis Method | : E:\DATA\GYQ\GYQ-GM\2-F&4-F 2016-12-01 11-52-30\VWD-0J(1-2)-95-5-1.0ML-3UL-210NM-60MIN.M (Sequence Method) |            |            |
| Last changed    | : 6/10/2017 9:33:13 PM by SYSTEM<br>(modified after loading)                                                |            |            |

Additional Info : Peak(s) manually integrated

=====

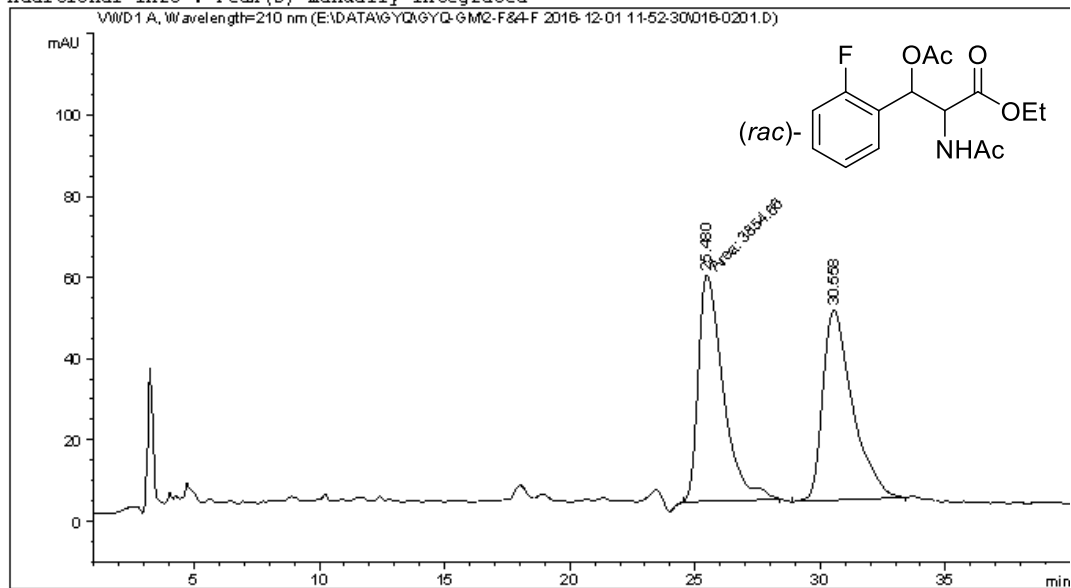

=====  
Area Percent Report  
=====

Sorted By : Signal  
Multiplier : 1.0000  
Dilution : 1.0000  
Do not use Multiplier & Dilution Factor with ISTDs

Signal 1: VWD1 A, Wavelength=210 nm

| Peak # | RetTime [min] | Type | Width [min] | Area [mAU*s] | Height [mAU] | Area %  |
|--------|---------------|------|-------------|--------------|--------------|---------|
| 1      | 25.480        | MM   | 1.1541      | 3854.65820   | 55.66693     | 49.8791 |
| 2      | 30.558        | BB   | 1.2099      | 3873.35205   | 46.73795     | 50.1209 |

Totals : 7728.01025 102.40487

=====  
\*\*\* End of Report \*\*\*

Data File E:\DATA\GYQ\GYQ-GM\2-F&4-F 2016-12-01 11-52-30\017-0301.D  
Sample Name: 2-F-EE

=====

|                 |                                                                                                             |            |            |
|-----------------|-------------------------------------------------------------------------------------------------------------|------------|------------|
| Acq. Operator   | : SYSTEM                                                                                                    | Seq. Line  | : 3        |
| Acq. Instrument | : 1260HPLC-VWD                                                                                              | Location   | : Vial 17  |
| Injection Date  | : 12/1/2016 1:15:49 PM                                                                                      | Inj        | : 1        |
|                 |                                                                                                             | Inj Volume | : 5.000 µl |
| Acq. Method     | : E:\DATA\GYQ\GYQ-GM\2-F&4-F 2016-12-01 11-52-30\VWD-0J(1-2)-95-5-1.0ML-5UL-210NM-40MIN.M                   |            |            |
| Last changed    | : 12/1/2016 11:52:30 AM by SYSTEM                                                                           |            |            |
| Analysis Method | : E:\DATA\GYQ\GYQ-GM\2-F&4-F 2016-12-01 11-52-30\VWD-0J(1-2)-95-5-1.0ML-5UL-210NM-40MIN.M (Sequence Method) |            |            |
| Last changed    | : 6/10/2017 9:32:28 PM by SYSTEM                                                                            |            |            |
| Additional Info | : Peak(s) manually integrated                                                                               |            |            |

=====

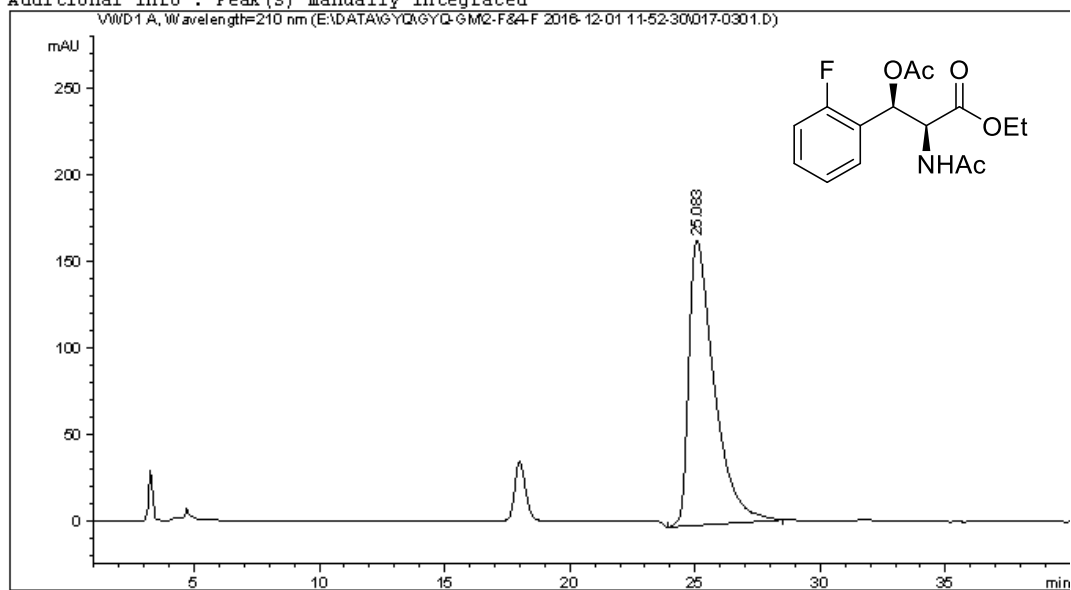

=====  
Area Percent Report  
=====

Sorted By : Signal  
Multiplier : 1.0000  
Dilution : 1.0000  
Do not use Multiplier & Dilution Factor with ISTDs

Signal 1: VWD1 A, Wavelength=210 nm

| Peak # | RetTime [min] | Type | Width [min] | Area [mAU*s] | Height [mAU] | Area %   |
|--------|---------------|------|-------------|--------------|--------------|----------|
| 1      | 25.083        | BB   | 1.0454      | 1.16220e4    | 164.27574    | 100.0000 |

Totals : 1.16220e4 164.27574

=====  
\*\*\* End of Report \*\*\*

Data File E:\DATA\GYQ\GYQ-GM\2-NAI-DAD-ODH 2016-11-02 21-45-56\004-1401.D  
Sample Name: 2-nai-rac

```

=====
Acq. Operator   : SYSTEM                      Seq. Line :   14
Acq. Instrument : 1260HPLC-DAD                Location  : Vial 4
Injection Date  : 11/3/2016 2:58:41 PM        Inj       :    1
                                           Inj Volume: 5.000 µl
Acq. Method     : E:\DATA\GYQ\GYQ-GM\2-NAI-DAD-ODH 2016-11-02 21-45-56\DAD-OD(1-2)-95-5-
                                           1ML-75MIN-210-254.M
Last changed    : 11/3/2016 4:09:32 PM by SYSTEM
                                           (modified after loading)
Analysis Method : E:\DATA\GYQ\GYQ-GM\2-NAI-DAD-ODH 2016-11-02 21-45-56\DAD-OD(1-2)-95-5-
                                           1ML-75MIN-210-254.M (Sequence Method)
Last changed    : 6/10/2017 10:03:39 PM by SYSTEM
                                           (modified after loading)
Additional Info : Peak(s) manually integrated
=====

```

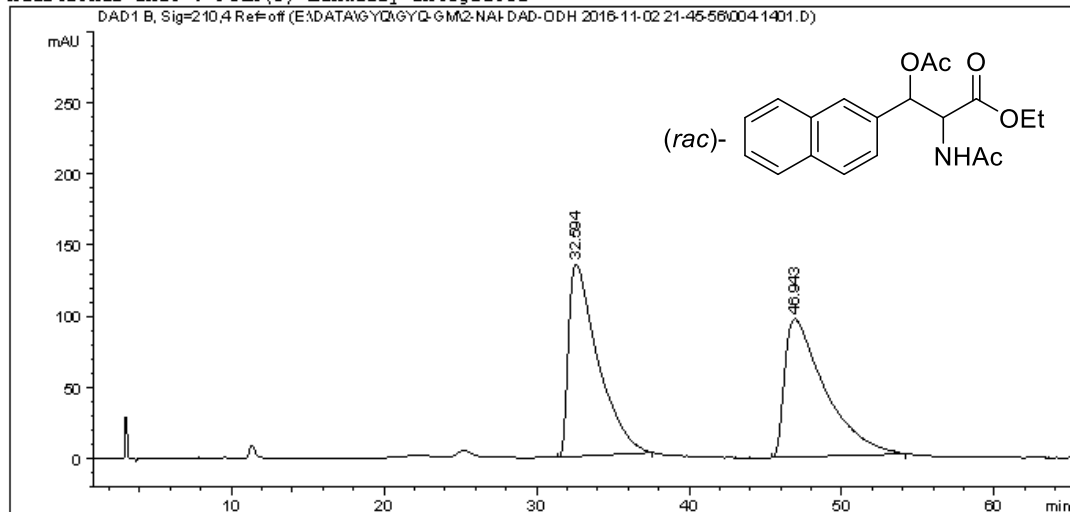

# Area Percent Report

```

Sorted By       : Signal
Multiplier      : 1.0000
Dilution        : 1.0000
Do not use Multiplier & Dilution Factor with ISTDs

```

Signal 1: DAD1 B, Sig=210,4 Ref=off

| Peak # | RetTime [min] | Type | Width [min] | Area [mAU*s] | Height [mAU] | Area %  |
|--------|---------------|------|-------------|--------------|--------------|---------|
| 1      | 32.594        | BB   | 1.5638      | 1.80568e4    | 135.23212    | 50.3901 |
| 2      | 46.943        | BB   | 2.1466      | 1.77773e4    | 96.89047     | 49.6099 |

Totals : 3.58341e4 232.12259

\*\*\* End of Report \*\*\*

Data File E:\DATA\GYQ\GYQ-GM\2-NAI-DAD-ODH 2016-11-02 21-45-56\005-1501.D  
Sample Name: 2-nai-ee

```
=====
Acq. Operator   : SYSTEM                      Seq. Line :   15
Acq. Instrument : 1260HPLC-DAD                Location  : Vial 5
Injection Date  : 11/3/2016 4:10:27 PM        Inj       :    1
                                           Inj Volume: 5.000 µl
Acq. Method     : E:\DATA\GYQ\GYQ-GM\2-NAI-DAD-ODH 2016-11-02 21-45-56\
DAD-OD(1-2)-95-5-1ML-75MIN-210-254.M
Last changed    : 11/3/2016 5:15:06 PM by SYSTEM
                  (modified after loading)
Analysis Method : E:\DATA\GYQ\GYQ-GM\2-NAI-DAD-ODH 2016-11-02 21-45-56\
DAD-OD(1-2)-95-5-1ML-75MIN-210-254.M (Sequence Method)
Last changed    : 6/10/2017 10:04:50 PM by SYSTEM
                  (modified after loading)
Additional Info : Peak(s) manually integrated
=====
```

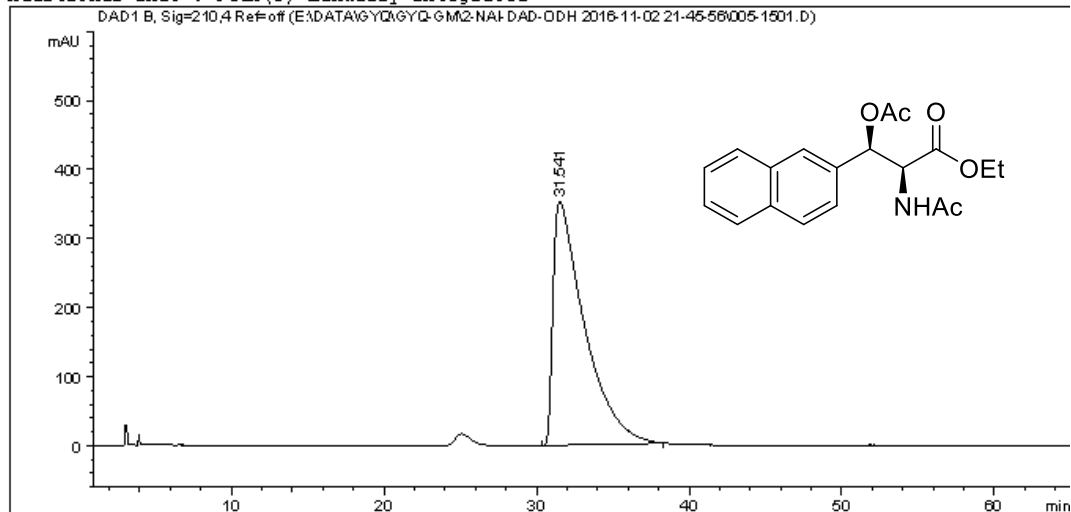

=====  
Area Percent Report  
=====

Sorted By : Signal  
Multiplier : 1.0000  
Dilution : 1.0000  
Do not use Multiplier & Dilution Factor with ISTDs

Signal 1: DAD1 B, Sig=210,4 Ref=off

| Peak # | RetTime [min] | Type | Width [min] | Area [mAU*s] | Height [mAU] | Area %   |
|--------|---------------|------|-------------|--------------|--------------|----------|
| 1      | 31.541        | BB   | 1.6780      | 5.03139e4    | 352.76291    | 100.0000 |

Totals : 5.03139e4 352.76291

=====  
\*\*\* End of Report \*\*\*



Data File E:\DATA\GYQ\GYQ-GM\DIOME-EE 2017-01-07 17-13-58\053-0201.D  
Sample Name: GYQ-DiOMe-rac

=====

|                 |                                                                                                           |            |            |
|-----------------|-----------------------------------------------------------------------------------------------------------|------------|------------|
| Acq. Operator   | : SYSTEM                                                                                                  | Seq. Line  | : 2        |
| Acq. Instrument | : 1260HPLC-VWD                                                                                            | Location   | : Vial 53  |
| Injection Date  | : 1/7/2017 5:30:36 PM                                                                                     | Inj        | : 1        |
|                 |                                                                                                           | Inj Volume | : 5.000 µl |
| Acq. Method     | : E:\DATA\GYQ\GYQ-GM\DIOME-EE 2017-01-07 17-13-58\VWD-0J(1-6)-80-20-1.OML-210NM-50MIN.M                   |            |            |
| Last changed    | : 1/7/2017 5:13:58 PM by SYSTEM                                                                           |            |            |
| Analysis Method | : E:\DATA\GYQ\GYQ-GM\DIOME-EE 2017-01-07 17-13-58\VWD-0J(1-6)-80-20-1.OML-210NM-50MIN.M (Sequence Method) |            |            |
| Last changed    | : 6/10/2017 10:06:45 PM by SYSTEM<br>(modified after loading)                                             |            |            |

Additional Info : Peak(s) manually integrated

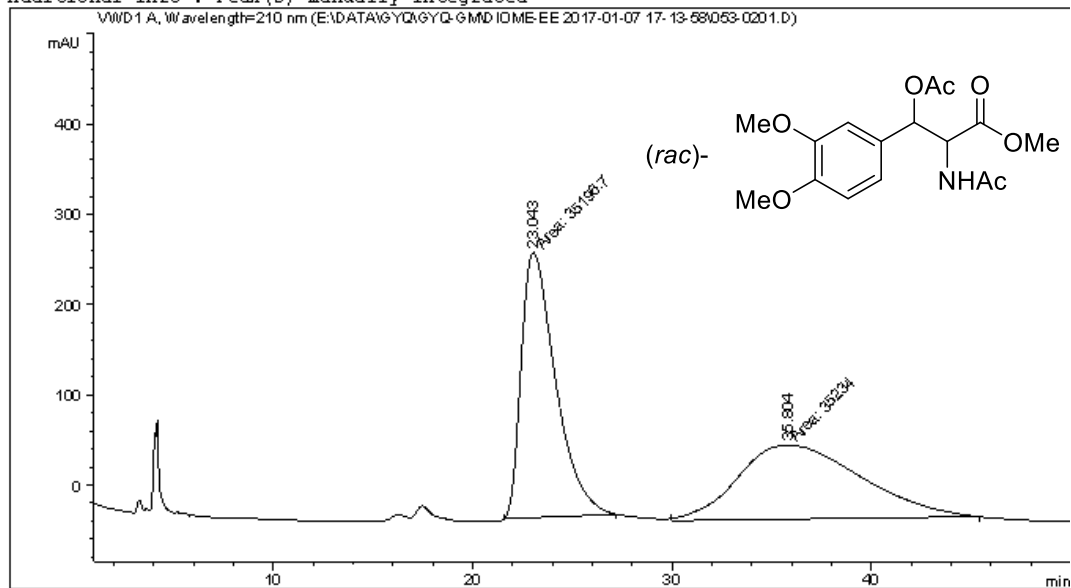

=====  
Area Percent Report  
=====

Sorted By : Signal  
Multiplier : 1.0000  
Dilution : 1.0000  
Do not use Multiplier & Dilution Factor with ISTDs

Signal 1: VWD1 A, Wavelength=210 nm

| Peak # | RetTime [min] | Type | Width [min] | Area [mAU*s] | Height [mAU] | Area %  |
|--------|---------------|------|-------------|--------------|--------------|---------|
| 1      | 23.043        | MM   | 1.9981      | 3.51967e4    | 293.58615    | 49.9735 |
| 2      | 35.804        | MM   | 7.1639      | 3.52340e4    | 81.97152     | 50.0265 |

Totals : 7.04308e4 375.55767

=====  
\*\*\* End of Report \*\*\*

Data File E:\DATA\GYQ\GYQ-GM\DIOME-EE 2017-01-07 17-13-58\054-0301.D  
Sample Name: GYQ-DiOMe-ee

```
=====
Acq. Operator   : SYSTEM                      Seq. Line :    3
Acq. Instrument : 1260HPLC-VWD                Location  : Vial 54
Injection Date  : 1/7/2017 6:21:24 PM          Inj       :    1
                                           Inj Volume: 5.000 µl
Acq. Method     : E:\DATA\GYQ\GYQ-GM\DIOME-EE 2017-01-07 17-13-58\VWD-0J(1-6)-80-20-1.OML-
210NM-50MIN.M
Last changed    : 1/7/2017 5:13:58 PM by SYSTEM
Analysis Method : E:\DATA\GYQ\GYQ-GM\DIOME-EE 2017-01-07 17-13-58\VWD-0J(1-6)-80-20-1.OML-
210NM-50MIN.M (Sequence Method)
Last changed    : 6/10/2017 10:11:50 PM by SYSTEM
Additional Info : Peak(s) manually integrated
=====
```

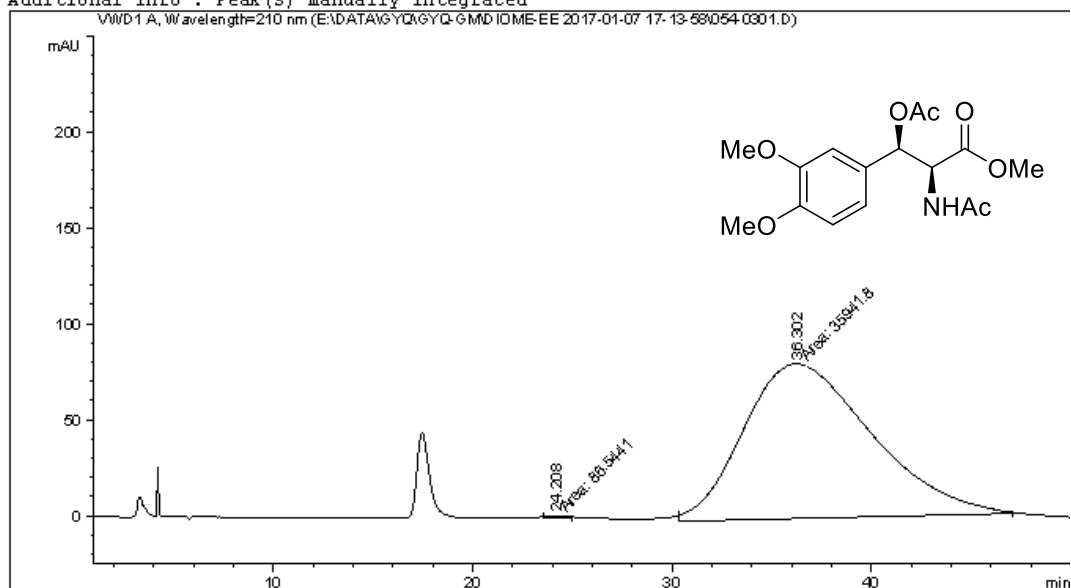

# Area Percent Report

```
Sorted By      : Signal
Multiplier     : 1.0000
Dilution      : 1.0000
Do not use Multiplier & Dilution Factor with ISTDs
```

Signal 1: VWD1 A, Wavelength=210 nm

| Peak # | RetTime [min] | Type | Width [min] | Area [mAU*s] | Height [mAU] | Area %  |
|--------|---------------|------|-------------|--------------|--------------|---------|
| 1      | 24.208        | MM   | 1.1890      | 86.54407     | 1.21313      | 0.2402  |
| 2      | 36.302        | MM   | 7.4595      | 3.59418e4    | 80.30405     | 99.7598 |

Totals : 3.60284e4 81.51717

\*\*\* End of Report \*\*\*

Data File E:\DATA\GYQ\GYQ-GM\GYQ-DIOBN-OD 2017-05-10 14-53-04\063-0501.D  
Sample Name: GYQ-DIOBN-RAC

=====

|                 |                                                                                                                 |            |            |
|-----------------|-----------------------------------------------------------------------------------------------------------------|------------|------------|
| Acq. Operator   | : SYSTEM                                                                                                        | Seq. Line  | : 5        |
| Acq. Instrument | : 1260HPLC-DAD                                                                                                  | Location   | : Vial 63  |
| Injection Date  | : 5/10/2017 5:47:55 PM                                                                                          | Inj        | : 1        |
|                 |                                                                                                                 | Inj Volume | : 5.000 µl |
| Acq. Method     | : E:\DATA\GYQ\GYQ-GM\GYQ-DIOBN-OD 2017-05-10 14-53-04\DAD-OD (1-2)-80-20-1ML-5UL- ALL-65MIN.M                   |            |            |
| Last changed    | : 5/10/2017 5:08:19 PM by SYSTEM                                                                                |            |            |
| Analysis Method | : E:\DATA\GYQ\GYQ-GM\GYQ-DIOBN-OD 2017-05-10 14-53-04\DAD-OD (1-2)-80-20-1ML-5UL- ALL-65MIN.M (Sequence Method) |            |            |
| Last changed    | : 6/11/2017 8:08:23 AM by SYSTEM                                                                                |            |            |
|                 | (modified after loading)                                                                                        |            |            |

Additional Info : Peak(s) manually integrated

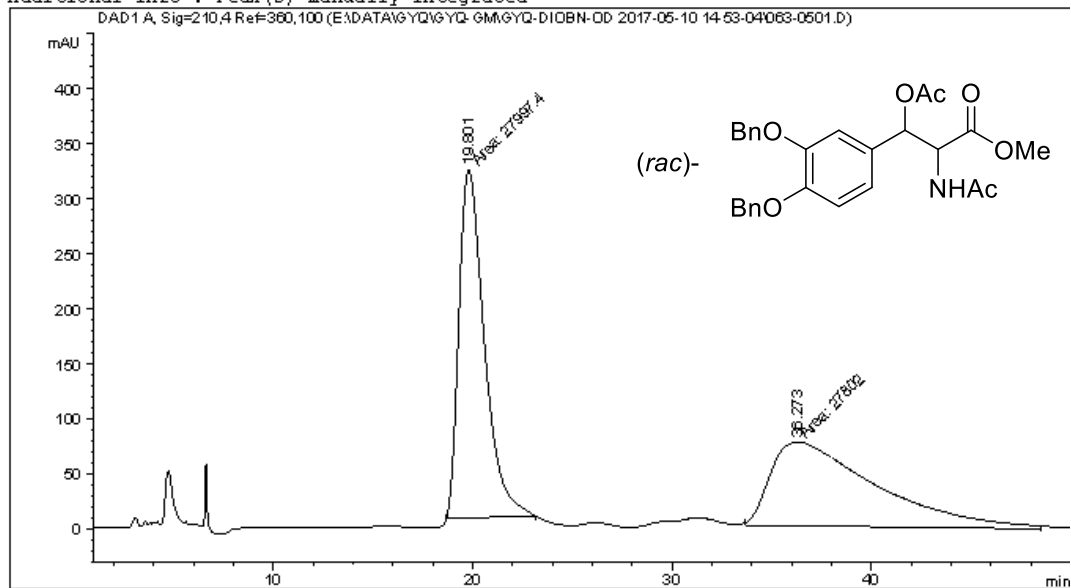

=====  
Area Percent Report  
=====

Sorted By : Signal  
Multiplier : 1.0000  
Dilution : 1.0000  
Do not use Multiplier & Dilution Factor with ISTDs

Signal 1: DAD1 A, Sig=210,4 Ref=360,100

| Peak # | RetTime [min] | Type | Width [min] | Area [mAU*s] | Height [mAU] | Area %  |
|--------|---------------|------|-------------|--------------|--------------|---------|
| 1      | 19.801        | MM   | 1.4744      | 2.79974e4    | 316.48984    | 50.1751 |
| 2      | 36.273        | MM   | 6.0796      | 2.78020e4    | 76.21697     | 49.8249 |

Totals : 5.57993e4 392.70681

=====  
\*\*\* End of Report \*\*\*

Data File E:\DATA\GYQ\GYQ-GM\GYQ-DIOBN-OD-2 2017-06-10 22-47-09\052-0301.D  
Sample Name: GYQ-DIOBN-EE

=====

|                 |                                                                                                                  |            |            |
|-----------------|------------------------------------------------------------------------------------------------------------------|------------|------------|
| Acq. Operator   | : SYSTEM                                                                                                         | Seq. Line  | : 3        |
| Acq. Instrument | : 1260HPLC-DAD                                                                                                   | Location   | : Vial 52  |
| Injection Date  | : 6/11/2017 12:04:17 AM                                                                                          | Inj        | : 1        |
|                 |                                                                                                                  | Inj Volume | : 5.000 µl |
| Acq. Method     | : E:\DATA\GYQ\GYQ-GM\GYQ-DIOBN-OD-2 2017-06-10 22-47-09\DAD-OD(1-2)-80-20-1ML-5UL- ALL-55MIN.M                   |            |            |
| Last changed    | : 6/10/2017 10:47:10 PM by SYSTEM                                                                                |            |            |
| Analysis Method | : E:\DATA\GYQ\GYQ-GM\GYQ-DIOBN-OD-2 2017-06-10 22-47-09\DAD-OD(1-2)-80-20-1ML-5UL- ALL-55MIN.M (Sequence Method) |            |            |
| Last changed    | : 6/11/2017 8:03:37 AM by SYSTEM<br>(modified after loading)                                                     |            |            |

Additional Info : Peak(s) manually integrated

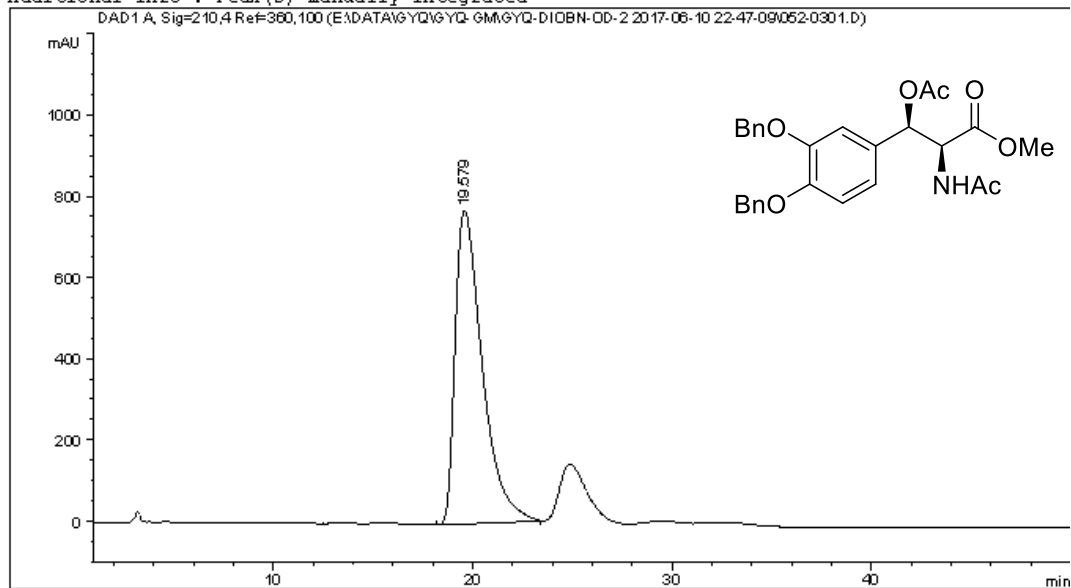

=====  
Area Percent Report  
=====

Sorted By : Signal  
Multiplier : 1.0000  
Dilution : 1.0000  
Do not use Multiplier & Dilution Factor with ISTDs

Signal 1: DAD1 A, Sig=210,4 Ref=360,100

| Peak # | RetTime [min] | Type | Width [min] | Area [mAU*s] | Height [mAU] | Area %   |
|--------|---------------|------|-------------|--------------|--------------|----------|
| 1      | 19.579        | BV   | 1.1123      | 7.29634e4    | 770.80939    | 100.0000 |

Totals : 7.29634e4 770.80939

=====  
\*\*\* End of Report \*\*\*

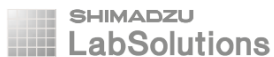

# Analysis Report

## <Sample Information>

Sample Name : gyq-cyclo-rac  
 Sample ID : L/RhRu,2/2,0.15,i-Pr/MeOH  
 Data Filename : gyq-cyclo-rac-1.gcd  
 Method Filename : gamma dex-225-250-100(0)-2-160(20)-260-50min.gcm  
 Batch Filename : gyq-cyclo.gcb  
 Vial # : 1  
 Injection Volume : 1 uL  
 Date Acquired : 2016-11-1 16:55:03  
 Date Processed : 2016-11-1 19:32:58

Sample Type : Unknown  
 Acquired by : System Administrator  
 Processed by : System Administrator

## <Chromatogram>

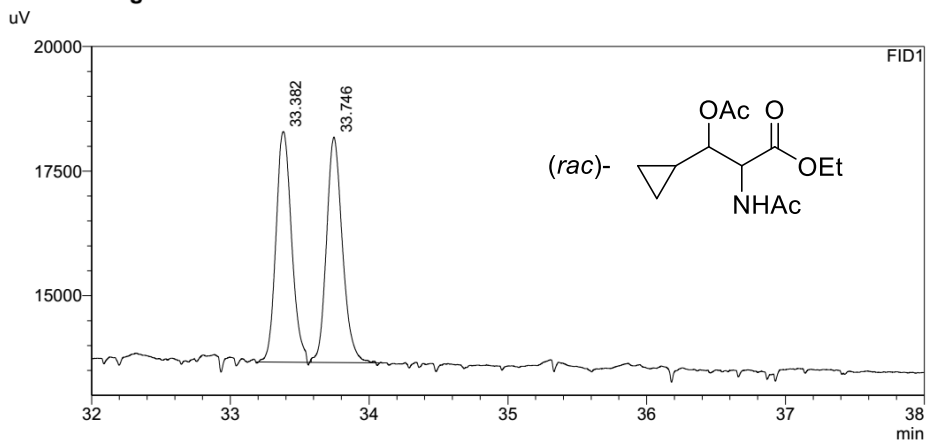

## <Peak Table>

| Peak# | Ret. Time | Area  | Height | Conc.  | Unit | Mark | Name |
|-------|-----------|-------|--------|--------|------|------|------|
| 1     | 33.382    | 36228 | 4620   | 50.079 |      | M    |      |
| 2     | 33.746    | 36114 | 4519   | 49.921 |      | V M  |      |
| Total |           | 72342 | 9139   |        |      |      |      |

D:\DATA FILE\gyq\data\gyq-cyclo\gyq-cyclo-rac-1.gcd

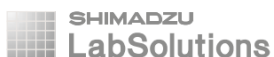

# Analysis Report

## <Sample Information>

Sample Name : gyq-cyclo-ee  
Sample ID : L/Rh,2/2,0.15,i-Pr/TFE  
Data Filename : gyq-cyclo-ee.gcd  
Method Filename : gamma dex-225-250-100(0)-2-160(20)-260-50min.gcm  
Batch Filename : gyq-cyclo-ee.gcb  
Vial # : 2  
Injection Volume : 1 uL  
Date Acquired : 2016-11-2 16:47:55  
Date Processed : 2016-11-3 11:26:04  
Sample Type : Unknown  
Acquired by : System Administrator  
Processed by : System Administrator

## <Chromatogram>

uV

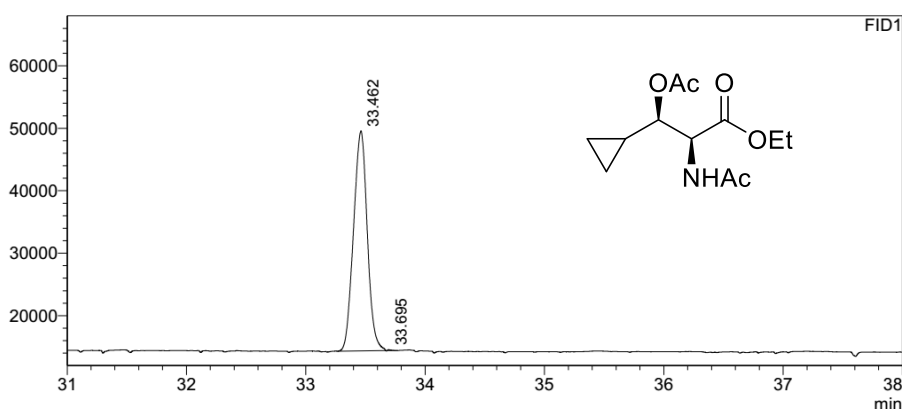

## <Peak Table>

FID1

| Peak# | Ret. Time | Area   | Height | Conc.  | Unit | Mark | Name |
|-------|-----------|--------|--------|--------|------|------|------|
| 1     | 33.462    | 282372 | 35203  | 99.940 |      | M    |      |
| 2     | 33.695    | 170    | 125    | 0.060  |      | M    |      |
| Total |           | 282542 | 35327  |        |      |      |      |

D:\DATA FILE\gyq\data\gyq-cyclo\gyq-cyclo-ee.gcd

Data File E:\DATA\GYQ\GYQ-GM\ME&YIDINGJI-EE 2016-12-07 22-06-14\084-0901.D  
Sample Name: Me-rac

=====

|                 |                                                                            |            |            |
|-----------------|----------------------------------------------------------------------------|------------|------------|
| Acq. Operator   | : SYSTEM                                                                   | Seq. Line  | : 9        |
| Acq. Instrument | : 1260HPLC-DAD                                                             | Location   | : Vial 84  |
| Injection Date  | : 12/8/2016 2:16:41 AM                                                     | Inj        | : 1        |
|                 |                                                                            | Inj Volume | : 5.000 µl |
| Acq. Method     | : E:\DATA\GYQ\GYQ-GM\ME&YIDINGJI-EE 2016-12-07 22-06-14\DAD-0J(1-6)-95-5-1 |            |            |
|                 | .OML-5-210NM-50MIN.M                                                       |            |            |
| Last changed    | : 12/7/2016 10:06:16 PM by SYSTEM                                          |            |            |
| Analysis Method | : E:\DATA\GYQ\GYQ-GM\ME&YIDINGJI-EE 2016-12-07 22-06-14\DAD-0J(1-6)-95-5-1 |            |            |
|                 | .OML-5-210NM-50MIN.M (Sequence Method)                                     |            |            |
| Last changed    | : 6/10/2017 9:41:25 PM by SYSTEM                                           |            |            |
|                 | (modified after loading)                                                   |            |            |
| Additional Info | : Peak(s) manually integrated                                              |            |            |

=====

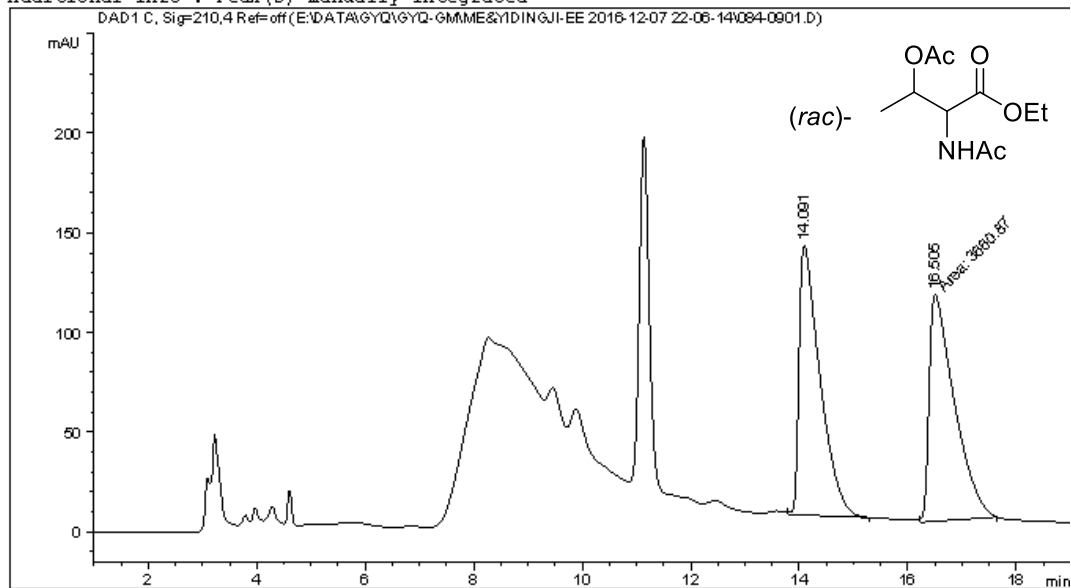

=====  
Area Percent Report  
=====

Sorted By : Signal  
Multiplier : 1.0000  
Dilution : 1.0000  
Do not use Multiplier & Dilution Factor with ISTDs

Signal 1: DAD1 C, Sig=210,4 Ref=off

| Peak # | RetTime [min] | Type | Width [min] | Area [mAU*s] | Height [mAU] | Area %  |
|--------|---------------|------|-------------|--------------|--------------|---------|
| 1      | 14.091        | VB   | 0.3868      | 3606.98047   | 135.41585    | 49.6293 |
| 2      | 16.505        | MM   | 0.5364      | 3660.87134   | 113.74592    | 50.3707 |

Totals : 7267.85181 249.16177

=====  
\*\*\* End of Report \*\*\*

Data File E:\DATA\GYQ\GYQ-GM\ME&YIDINGJI-EE 2016-12-07 22-06-14\085-1001.D  
Sample Name: Me-EE

=====

|                                               |                                                                            |            |            |
|-----------------------------------------------|----------------------------------------------------------------------------|------------|------------|
| Acq. Operator                                 | : SYSTEM                                                                   | Seq. Line  | : 10       |
| Acq. Instrument                               | : 1260HPLC-DAD                                                             | Location   | : Vial 85  |
| Injection Date                                | : 12/8/2016 3:07:45 AM                                                     | Inj        | : 1        |
|                                               |                                                                            | Inj Volume | : 5.000 µl |
| Acq. Method                                   | : E:\DATA\GYQ\GYQ-GM\ME&YIDINGJI-EE 2016-12-07 22-06-14\DAD-0J(1-6)-95-5-1 |            |            |
|                                               | .OML-5-210NM-50MIN.M                                                       |            |            |
| Last changed                                  | : 12/7/2016 10:06:16 PM by SYSTEM                                          |            |            |
| Analysis Method                               | : E:\DATA\GYQ\GYQ-GM\ME&YIDINGJI-EE 2016-12-07 22-06-14\DAD-0J(1-6)-95-5-1 |            |            |
|                                               | .OML-5-210NM-50MIN.M (Sequence Method)                                     |            |            |
| Last changed                                  | : 6/10/2017 9:43:20 PM by SYSTEM                                           |            |            |
|                                               | (modified after loading)                                                   |            |            |
| Additional Info : Peak(s) manually integrated |                                                                            |            |            |

=====

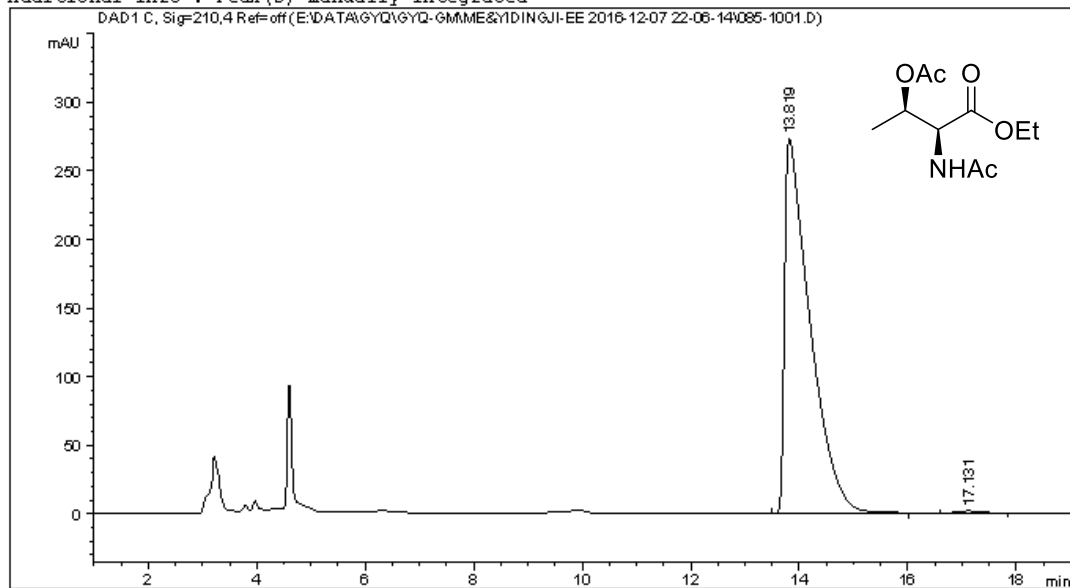

=====  
Area Percent Report  
=====

Sorted By : Signal  
Multiplier : 1.0000  
Dilution : 1.0000  
Do not use Multiplier & Dilution Factor with ISTDs

Signal 1: DAD1 C, Sig=210,4 Ref=off

| Peak # | RetTime [min] | Type | Width [min] | Area [mAU*s] | Height [mAU] | Area %  |
|--------|---------------|------|-------------|--------------|--------------|---------|
| 1      | 13.819        | BB   | 0.4619      | 8835.72461   | 272.76071    | 99.5346 |
| 2      | 17.131        | BB   | 0.3341      | 41.31002     | 1.49612      | 0.4654  |

Totals : 8877.03463 274.25683

=====  
\*\*\* End of Report \*\*\*
